# Supplementary material for: Indole C6 Functionalization of Tryprostatin B Using Prenyltransferase CdpNPT
Source: PubMed Central journal article supplement (PMC7906295; doi:10.3390/catal10111247), 2020-10-28
Supplement: NIHMS1669452-supplement-Supplementary_Material.pdf [file NIHMS1669452-supplement-Supplementary_Material.pdf]

*Supplementary Materials*

# Indole C6 Functionalization of Tryprostatin B Using Prenyltransferase CdpNPT

**Eric D. Gardner**<sup>1</sup>, **Dustin A. Dimas**<sup>1</sup>, **Matthew C. Finneran**<sup>1, †</sup>, **Sara M. Brown**<sup>1</sup>, **Anthony W. Burgett**<sup>2</sup> and **Shanteri Singh**<sup>1,\*</sup>

<sup>1</sup> Department of Chemistry and Biochemistry, University of Oklahoma; Norman, OK 73019, USA; ericgardner@ou.edu (E.D.G.); Dustin.Dimas-1@ou.edu (D.A.D.); mcfinner@umich.edu (M.C.F.); Sara.M.Brown-1@ou.edu (S.M.B.)

<sup>2</sup> Department of Pharmaceutical Sciences, University of Oklahoma; Oklahoma City, OK 73117, USA; Anthony-Burgett@ouhsc.edu

\* Correspondence: Shanteri.singh@ou.edu

† Neuroscience Graduate Program, University of Michigan Medical School, Ann Arbor, MI 48109, USA

## Table of contents

|                                                                              |         |
|------------------------------------------------------------------------------|---------|
| 1. Figure S1: Analytical Scale CdpNPT Screening HPLC Traces.....             | S2      |
| 2. Table S1: Raw HPLC data for analytical scale TPS reactions.....           | S3      |
| 3. Figure S2: Cytotoxicity GI50 dose-response curves.....                    | S4      |
| 4. Table S2: HRMS data of positive reactions in TPS enzyme screening.....    | S5      |
| 5. Figure S3: Representative NMR correlations for structural assignment..... | S6      |
| 6. Table S3: NMR assignments of all purified TPS analogs.....                | S6-S9   |
| 7. NMR spectra of TPS analogs.....                                           | S10-S50 |
| a. NMR spectra for <b>TPS-A</b> .....                                        | S10     |
| b. NMR spectra for <b>TPS-B</b> .....                                        | S11     |
| c. NMR spectra for <b>TPS-2</b> .....                                        | S12-S16 |
| d. NMR spectra for <b>TPS-7</b> .....                                        | S17-S20 |
| e. NMR spectra for <b>TPS-16</b> .....                                       | S21-S23 |
| f. NMR spectra for <b>TPS-24</b> .....                                       | S24-S27 |
| g. NMR spectra for <b>TPS-25</b> .....                                       | S28-S30 |
| h. NMR spectra for <b>TPS-46</b> .....                                       | S31-S34 |
| i. NMR spectra for <b>TPS-52</b> .....                                       | S35-S37 |
| j. NMR spectra for <b>TPS-58</b> .....                                       | S38-S41 |
| k. NMR spectra for <b>TPS-61</b> .....                                       | S42-S43 |
| l. NMR spectra for <b>TPS-62</b> .....                                       | S44-S46 |
| m. NMR spectra for <b>TPS-65</b> .....                                       | S47-S50 |
| 8. Raw HRMS data of TPS analogs.....                                         | S51-S77 |



## Analytical Scale CdpNPT Screening HPLC Traces

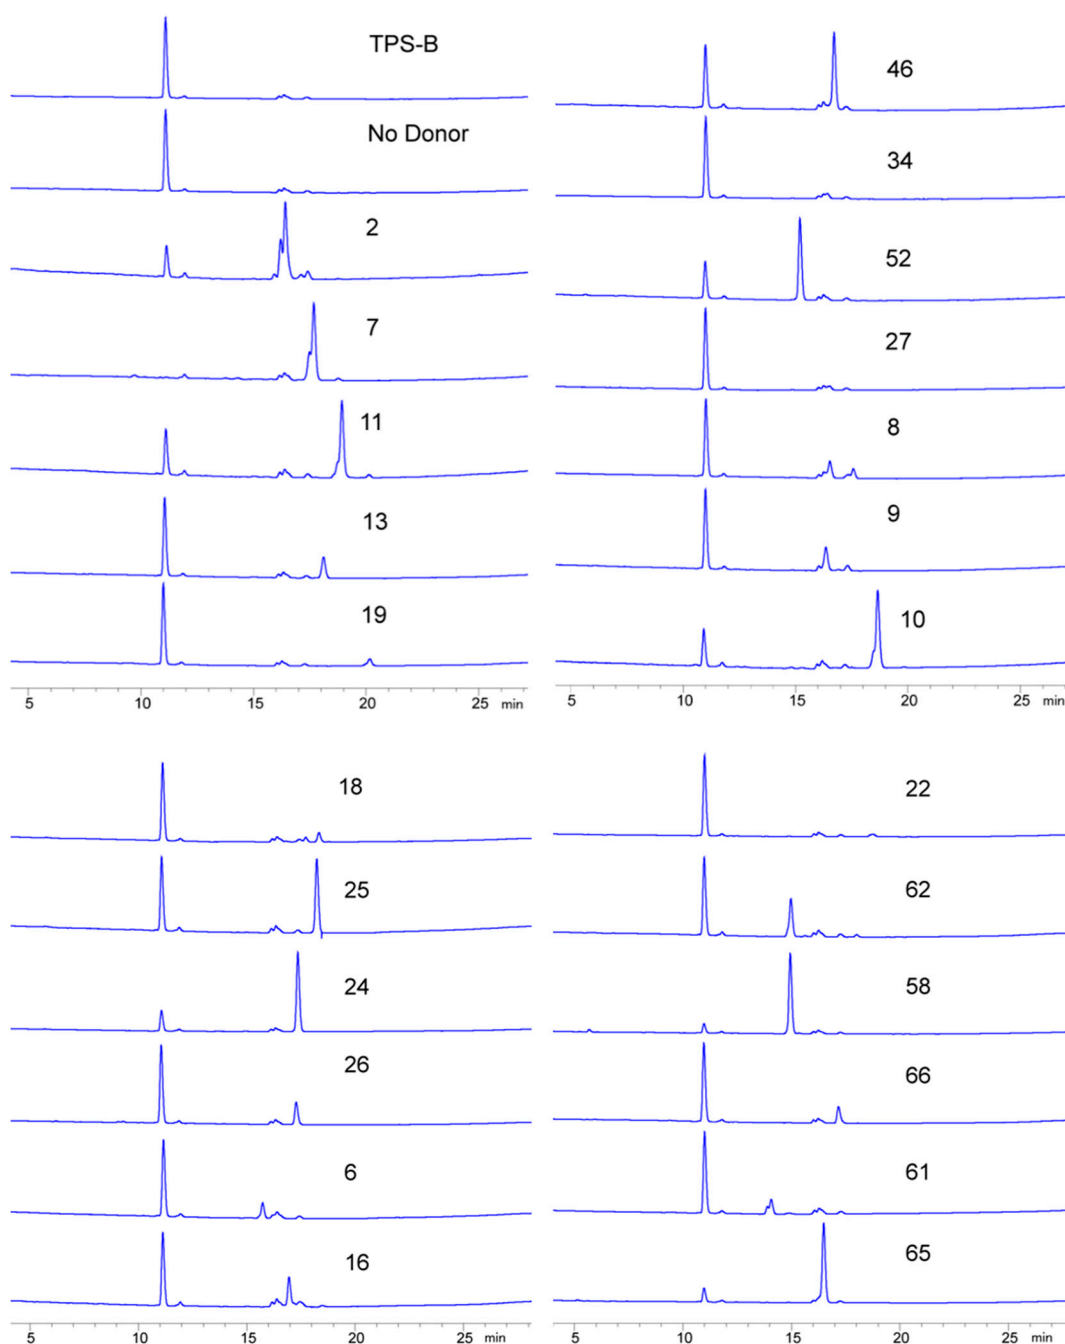

**Figure S1.** HPLC traces of analytical scale reactions containing TPS-B and CdpNPT under standard reaction conditions. Numerical labels indicate the alkyl-PP used in that reaction. TPS-B standard and enzymatic control reaction without the donor are indicated. The TPS-B used in these screenings is ~95% pure based on HPLC.

**Table S1.** Calculated percent turnover determined by HPLC in duplicate. Percent turnover was calculated by dividing the sum of all TPS-B and product peak areas by the peak area of remaining TPS-B.

| <b>OPP #</b> | <b>Trial 1 %<br/>Turnover</b> | <b>Trial 2 %<br/>Turnover</b> | <b>Mean %<br/>Turnover</b> | <b>Std<br/>Dev.</b> |
|--------------|-------------------------------|-------------------------------|----------------------------|---------------------|
| 2            | 80.93                         | 85.40                         | 83.17                      | 2.23                |
| 6            | 18.32                         | 21.34                         | 19.83                      | 1.51                |
| 7            | 99.15                         | 99.95                         | 99.55                      | 0.40                |
| 8            | 30.72                         | 32.12                         | 31.42                      | 0.70                |
| 9            | 28.13                         | 31.64                         | 29.88                      | 1.76                |
| 10           | 74.84                         | 76.86                         | 75.85                      | 1.01                |
| 11           | 71.88                         | 78.25                         | 75.06                      | 3.19                |
| 13           | 25.83                         | 30.50                         | 28.16                      | 2.33                |
| 16           | 35.52                         | 35.28                         | 35.40                      | 0.12                |
| 18           | 12.45                         | 13.51                         | 12.98                      | 0.53                |
| 19           | 12.63                         | 14.44                         | 13.54                      | 0.90                |
| 22           | 5.60                          | 6.34                          | 5.97                       | 0.37                |
| 24           | 80.40                         | 52.77                         | 66.59                      | 13.81               |
| 25           | 52.97                         | 58.86                         | 55.91                      | 2.95                |
| 26           | 24.63                         | 26.63                         | 25.63                      | 1.00                |
| 27           | 7.36                          | 8.00                          | 7.68                       | 0.32                |
| 34           | 7.45                          | 8.79                          | 8.12                       | 0.67                |
| 46           | 57.66                         | 64.90                         | 61.28                      | 3.62                |
| 52           | 69.94                         | 75.40                         | 72.67                      | 2.73                |
| 58           | 89.96                         | 92.27                         | 91.11                      | 1.15                |
| 61           | 16.45                         | 18.73                         | 17.59                      | 1.14                |
| 62           | 36.29                         | 38.85                         | 37.57                      | 1.28                |
| 65           | 87.13                         | 90.40                         | 88.76                      | 1.64                |
| 66           | 20.38                         | 24.08                         | 22.23                      | 1.85                |

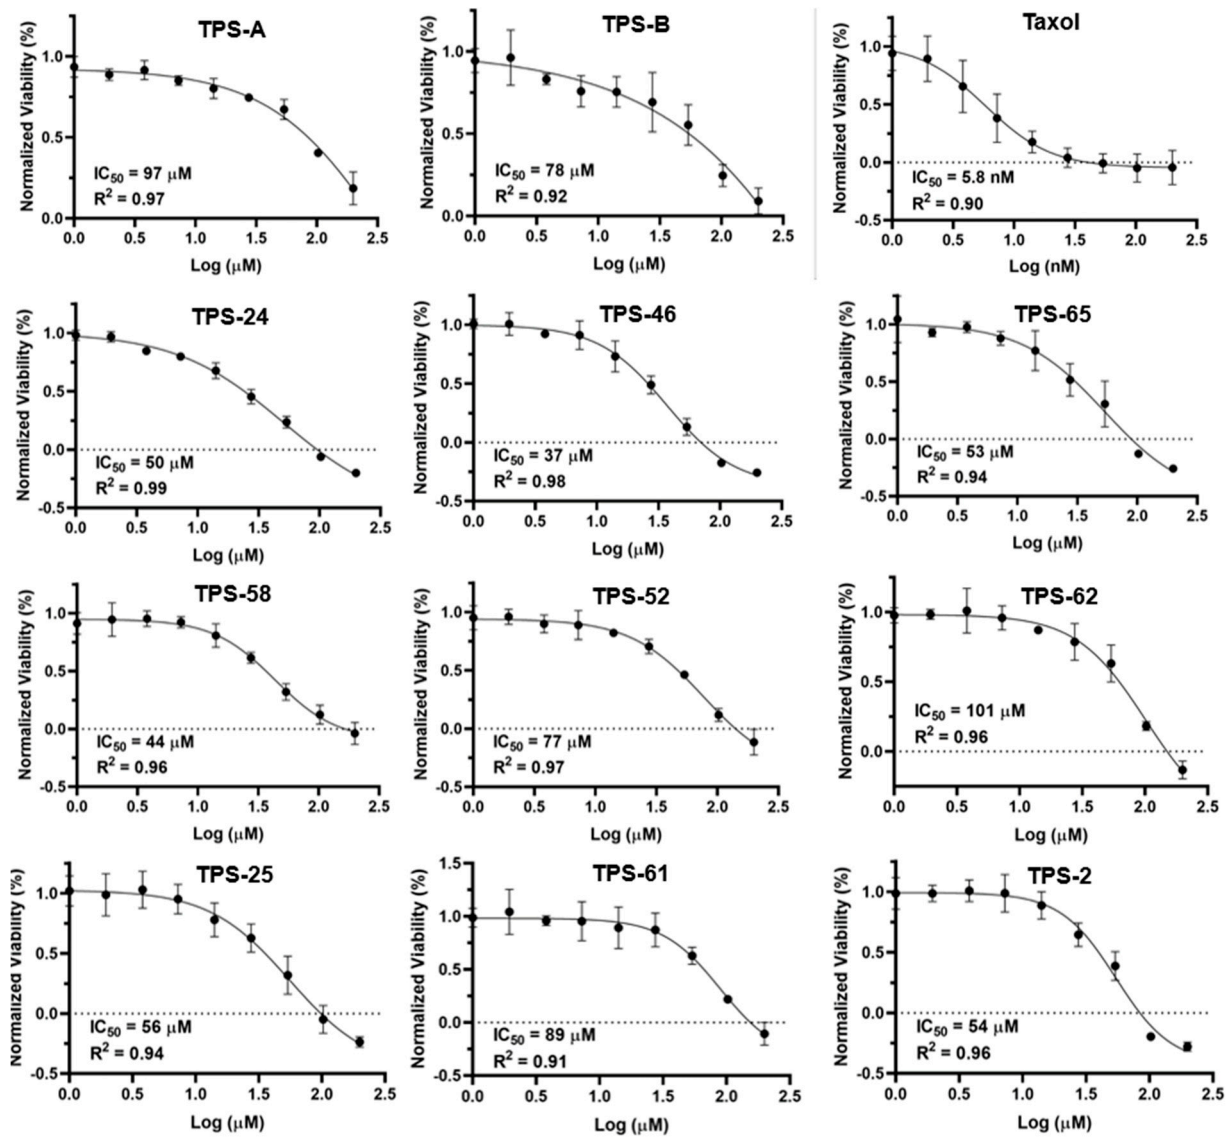

**Figure S2.** Cytotoxicity assay results for TPS analogs run in triplicate against K563 leukemia cells, with TPS-A, TPS-B, and Taxol as positive controls.

**Table S2.** HRMS data of the TPS analogs produced by CdpNPT and their corresponding alkyl donor

| <b>TPSB analog</b> | <b>Formula</b>                                                                     | <b>Calculated Mass</b> | <b>Observed Mass</b> |
|--------------------|------------------------------------------------------------------------------------|------------------------|----------------------|
| TPS-A              | C <sub>22</sub> H <sub>27</sub> N <sub>3</sub> O <sub>3</sub> [M+H] <sup>+</sup>   | 382.2125               | 382.2133             |
| TPS-B              | C <sub>21</sub> H <sub>25</sub> N <sub>3</sub> O <sub>2</sub> [M+H] <sup>+</sup>   | 352.20194              | 352.203              |
| TPS-2              | C <sub>26</sub> H <sub>33</sub> N <sub>3</sub> O <sub>2</sub> [M+H] <sup>+</sup>   | 420.26453              | 420.2659             |
| TPS-6              | C <sub>26</sub> H <sub>31</sub> N <sub>3</sub> O <sub>2</sub> [M+H] <sup>+</sup>   | 418.241627             | 418.2498             |
| TPS-7              | C <sub>27</sub> H <sub>35</sub> N <sub>3</sub> O <sub>2</sub> [M+H] <sup>+</sup>   | 434.272927             | 434.2819             |
| TPS-8              | C <sub>27</sub> H <sub>33</sub> N <sub>3</sub> O <sub>2</sub> [M+H] <sup>+</sup>   | 432.257277             | 432.265              |
| TPS-9              | C <sub>27</sub> H <sub>33</sub> N <sub>3</sub> O <sub>2</sub> [M+H] <sup>+</sup>   | 432.257277             | 432.2652             |
| TPS-10             | C <sub>28</sub> H <sub>37</sub> N <sub>3</sub> O <sub>2</sub> [M+H] <sup>+</sup>   | 448.288577             | 448.2971             |
| TPS-11             | C <sub>28</sub> H <sub>37</sub> N <sub>3</sub> O <sub>2</sub> [M+H] <sup>+</sup>   | 448.288577             | 448.2964             |
| TPS-13             | C <sub>28</sub> H <sub>35</sub> N <sub>3</sub> O <sub>2</sub> [M+H] <sup>+</sup>   | 446.272927             | 446.2809             |
| TPS-16             | C <sub>27</sub> H <sub>33</sub> N <sub>3</sub> O <sub>2</sub> [M+H] <sup>+</sup>   | 432.257277             | 432.2653             |
| TPS-18             | C <sub>28</sub> H <sub>35</sub> N <sub>3</sub> O <sub>2</sub> [M+H] <sup>+</sup>   | 446.272927             | 446.2810             |
| TPS-19             | C <sub>29</sub> H <sub>39</sub> N <sub>3</sub> O <sub>2</sub> [M+H] <sup>+</sup>   | 462.304226             | 462.3118             |
| TPS-22             | C <sub>29</sub> H <sub>37</sub> N <sub>3</sub> O <sub>2</sub> [M+H] <sup>+</sup>   | 460.288577             | 460.2964             |
| TPS-24             | C <sub>30</sub> H <sub>33</sub> N <sub>3</sub> O <sub>2</sub> [M+H] <sup>+</sup>   | 468.26453              | 468.2651             |
| TPS-25             | C <sub>31</sub> H <sub>35</sub> N <sub>3</sub> O <sub>2</sub> [M+H] <sup>+</sup>   | 482.28018              | 482.2802             |
| TPS-26             | C <sub>31</sub> H <sub>35</sub> N <sub>3</sub> O <sub>3</sub> [M+H] <sup>+</sup>   | 498.267842             | 498.2758             |
| TPS-27             | C <sub>29</sub> H <sub>35</sub> N <sub>3</sub> O <sub>2</sub> [M+H] <sup>+</sup>   | 458.272927             | 458.2814             |
| TPS-34             | C <sub>27</sub> H <sub>34</sub> N <sub>6</sub> O <sub>2</sub> [M+H] <sup>+</sup>   | 475.274324             | 475.2823             |
| TPS-46             | C <sub>29</sub> H <sub>33</sub> N <sub>3</sub> O <sub>2</sub> [M+H] <sup>+</sup>   | 456.26453              | 456.2655             |
| TPS-52             | C <sub>29</sub> H <sub>33</sub> N <sub>3</sub> O <sub>3</sub> [M+H] <sup>+</sup>   | 472.25945              | 472.2602             |
| TPS-58             | C <sub>29</sub> H <sub>31</sub> N <sub>3</sub> O <sub>4</sub> [M+H] <sup>+</sup>   | 486.23871              | 486.2389             |
| TPS-61-P1          | C <sub>26</sub> H <sub>29</sub> N <sub>3</sub> O <sub>3</sub> [M+H] <sup>+</sup>   | 432.22815              | 432.2292             |
| TPS-61-P2          | C <sub>26</sub> H <sub>29</sub> N <sub>3</sub> O <sub>3</sub> [M+H] <sup>+</sup>   | 432.22815              | 432.2294             |
| TPS-62             | C <sub>26</sub> H <sub>29</sub> N <sub>3</sub> O <sub>2</sub> S [M+H] <sup>+</sup> | 448.20531              | 448.2061             |
| TPS-65             | C <sub>30</sub> H <sub>31</sub> N <sub>3</sub> O <sub>3</sub> [M+H] <sup>+</sup>   | 482.2438               | 482.2442             |
| TPS-66             | C <sub>30</sub> H <sub>31</sub> N <sub>3</sub> O <sub>2</sub> S [M+H] <sup>+</sup> | 498.213699             | 498.2216             |

Table S3. Tryprostatin Analog NMR Assignment Table

| Segment   | Position | $\delta$ C (in ppm), type | $\delta$ H (in ppm) |
|-----------|----------|---------------------------|---------------------|
| L-Trp     | NH       |                           | 5.62 (s)            |
|           | $\alpha$ | 54.5, CH                  | 4.33 (dd)           |
|           | $\beta$  | 25.6, CH <sub>2</sub>     | 2.93 (m), 3.66 (d)  |
|           | 1        |                           | 7.98 (s)            |
|           | 2        | 136.5, C                  |                     |
|           | 3        | 104.5, C                  |                     |
|           | 3a       | 126.8, C                  |                     |
|           | 4        | 117.9, CH                 | 7.4 (d)             |
|           | 5        | 121.3, CH                 | 7.04 (d)            |
|           | 6        | 131.0, C                  |                     |
|           | 7        | 111.1, CH                 | 7.21 (s)            |
|           | 7a       | 136.1, C                  |                     |
|           | C=O      |                           |                     |
|           | Proline  | $\alpha$                  | 59.3, CH            |
| $\beta$   |          | 28.4, CH <sub>2</sub>     | 2.02 (m), 2.32 (dt) |
| $\gamma$  |          | 22.7, CH <sub>2</sub>     | 1.89 (m), 2.02 (m)  |
| $\delta$  |          | 45.4, CH <sub>2</sub>     | 3.58 (m), 3.65 (m)  |
| C=O       |          | 165.8, C                  |                     |
| C2-Prenyl | 1'       | 25.1, CH <sub>2</sub>     | 3.44 (qd)           |
|           | 2'       | 119.8, CH                 | 5.28 (m)            |
|           | 3'       | 135.5, C                  |                     |
|           | 4'       | 18.0, CH <sub>3</sub>     | 1.73 (s)            |
|           | 5'       | 25.8, CH <sub>3</sub>     | 1.76 (s)            |
| C6-Sub    | 1''      | 35.2, CH <sub>2</sub>     | 4.18 (s)            |
|           | 2''      | 158.6, C                  |                     |
|           | 3''      | 103.3, CH                 | 6.36 (s)            |
|           | 3a''     | 128.9, C                  |                     |
|           | 4''      | 111.0, CH                 | 7.38 (d)            |
|           | 5''      | 123.4, CH                 | 7.18 (td)           |
|           | 6''      | 122.6, CH                 | 7.15 (td)           |
|           | 7''      | 120.5, CH                 | 7.43 (d)            |
| 7a''      | 155.0, C |                           |                     |

**Figure S3:** Representative NMR correlations used to assign TPS analogs



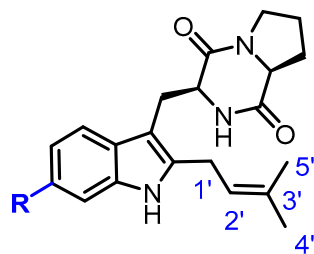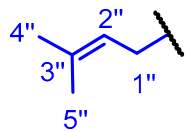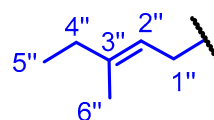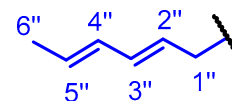

| Segment   | Position | TPS-2                 |                     | TPS-7                 |                     | TPS-16                |                     |
|-----------|----------|-----------------------|---------------------|-----------------------|---------------------|-----------------------|---------------------|
|           |          | $\delta C$ , type     | $\delta H$          | $\delta C$ , type     | $\delta H$          | $\delta C$ , type     | $\delta H$          |
| L-Trp     | NH       |                       | 5.61 (s)            |                       | 5.61 (s)            |                       | 5.61 (s)            |
|           | $\alpha$ | 54.6, CH              | 4.36 (m)            | 54.6, CH              | 4.34 (dd)           | 54.6, CH              | 4.35 (dd)           |
|           | $\beta$  | 25.5 CH <sub>2</sub>  | 2.93 (dd), 3.66 (m) | 25.6, CH <sub>2</sub> | 2.92 (dd), 3.64 (m) | 25.7, CH <sub>2</sub> | 2.93 (dd), 3.65 (m) |
|           | 1        |                       | 7.82 (s)            |                       | 7.81 (s)            |                       |                     |
|           | 2        |                       |                     |                       |                     |                       |                     |
|           | 3        |                       |                     |                       |                     |                       |                     |
|           | 3a       |                       |                     |                       |                     |                       |                     |
|           | 4        | 117.7, CH             | 7.37 (d)            | 117.6, CH             | 7.37 (d)            | 117.6, CH             | 7.38 (d)            |
|           | 5        | 121, CH               | 6.94 (d)            | 121.0, CH             | 6.94 (d)            | 121.1, CH             | 6.94 (d)            |
|           | 6        |                       |                     |                       |                     |                       |                     |
|           | 7        | 110.1, CH             | 7.12 (s)            | 110.1, CH             | 7.11 (s)            | 110.5, CH             | 7.13                |
| 7a        |          |                       |                     |                       |                     |                       |                     |
| C=O       |          |                       |                     |                       |                     |                       |                     |
| Proline   | $\alpha$ | 59.3, CH              | 4.05 (t)            | 59.6, CH              | 4.05 (t)            | 59.3, CH              | 4.06 (t)            |
|           | $\beta$  | 28.4, CH <sub>2</sub> | 2.05 (m), 2.35 (m)  | 28.3, CH <sub>2</sub> | 2.04 (m), 2.33 (m)  | 28.4, CH <sub>2</sub> | 2.05 (m), 2.35 (m)  |
|           | $\gamma$ | 22.7, CH <sub>2</sub> | 1.92 (m), 2.05 (m)  | 22.6, CH <sub>2</sub> | 1.91 (m), 2.04 (m)  | 22.9, CH <sub>2</sub> | 1.92 (m), 2.05 (m)  |
|           | $\delta$ | 45.5, CH <sub>2</sub> | 3.59 (m), 3.70 (m)  | 45.4, CH <sub>2</sub> | 3.59 (m), 3.67 (m)  | 45.4, CH <sub>2</sub> | 3.59 (m), 3.68 (m)  |
|           | C=O      |                       |                     |                       |                     |                       |                     |
| C2-Prenyl | 1'       | 25.2, CH <sub>2</sub> | 3.46 (d)            | 25.1, CH <sub>2</sub> | 3.45 (m)            | 25.2, CH <sub>2</sub> | 3.46 (m)            |
|           | 2'       | 119.8, CH             | 5.31 (t)            | 119.8, CH             | 5.29 (t)            | 119.6, CH             | 5.31 (t)            |
|           | 3'       |                       |                     |                       |                     |                       |                     |
|           | 4'       | 17.8, CH <sub>3</sub> | 1.75 (s)            | 18.0, CH <sub>3</sub> | 1.74 (s)            | 18.0, CH <sub>3</sub> | 1.75 (s)            |
|           | 5'       | 25.7, CH <sub>3</sub> | 1.76 (s)            | 25.7, CH <sub>3</sub> | 1.78 (s)            | 25.8, CH <sub>3</sub> | 1.79 (s)            |
| C6-Sub    | 1''      | 36.5, CH <sub>2</sub> | 3.42 (d)            | 34.3, CH <sub>2</sub> | 3.44 (m)            | 39.1, CH <sub>2</sub> | 3.48 (m)            |
|           | 2''      | 124.2, CH             | 5.37 (t)            | 122.3, CH             | 5.36                | 131.0, CH             | 5.72 (dt)           |
|           | 3''      |                       |                     |                       |                     | 131.4, CH             | 6.06 (m)            |
|           | 4''      | 17.8, CH <sub>3</sub> | 1.75 (s)            | 32.4, CH <sub>2</sub> | 2.05 (q)            | 131.4, CH             | 6.06 (m)            |
|           | 5''      | 25.7, CH <sub>3</sub> | 1.79 (s)            | 12.7, CH <sub>3</sub> | 1.02 (t)            | 127.7, CH             | 5.63 (m)            |
|           | 6''      |                       |                     | 16.0, CH <sub>3</sub> | 1.73 (s)            | 18.0, CH <sub>3</sub> | 1.73 (d)            |

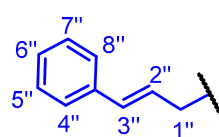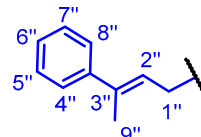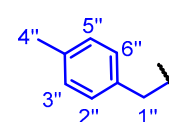

| Segment   | Position | TPS-24                |                     | TPS-25                |                     | TPS-46                |                     |
|-----------|----------|-----------------------|---------------------|-----------------------|---------------------|-----------------------|---------------------|
|           |          | $\delta C$ , type     | $\delta H$          | $\delta C$ , type     | $\delta H$          | $\delta C$ , type     | $\delta H$          |
| L-Trp     | NH       |                       | 5.62 (s)            |                       | 5.5 (s)             |                       | 5.6 (s)             |
|           | $\alpha$ | 54.5, CH              | 4.35 (dd)           | 54.7, CH              | 4.36 (dd)           | 54.5, CH              | 4.34 (dd)           |
|           | $\beta$  | 25.7, CH <sub>2</sub> | 2.92 (m), 3.66 (m)  | 25.7, CH <sub>2</sub> | 2.93 (dd), 3.64 (m) | 25.7, CH <sub>2</sub> | 2.91 (m), 3.65 (m)  |
|           | 1        |                       | 7.95 (s)            |                       | 7.83 (s)            |                       | 7.87 (s)            |
|           | 2        | 135.9, C              |                     |                       |                     | 136.0, C              |                     |
|           | 3        | 104.4, C              |                     |                       |                     | 104.4, C              |                     |
|           | 3a       | 126.5, C              |                     |                       |                     | 126.3, C              |                     |
|           | 4        | 117.5, CH             | 7.40 (d)            | 117.8, CH             | 7.39 (d)            | 117.6, CH             | 7.36 (d)            |
|           | 5        | 120.9, CH             | 6.99 (d)            | 121.1, CH             | 6.99 (dd)           | 121.3, CH             | 6.95 (d)            |
|           | 6        | 134.1, C              |                     |                       |                     | 135.7, C              |                     |
|           | 7        | 110.5, CH             | 7.17 (s)            | 110.3, CH             | 7.17 (s)            | 110.9, CH             | 7.06 (s)            |
| 7a        | 135.9, C |                       |                     |                       |                     |                       |                     |
| C=O       |          |                       |                     |                       |                     |                       |                     |
| Proline   | $\alpha$ | 59.2, CH              | 4.04 (t)            | 59.3, CH              | 4.05 (t)            | 59.3, CH              | 4.04 (t)            |
|           | $\beta$  | 28.4, CH <sub>2</sub> | 2.02 (m), 2.32 (dt) | 28.4, CH <sub>2</sub> | 2.03 (m), 2.33 (dt) | 28.3, CH <sub>2</sub> | 2.02 (m), 2.32 (dt) |
|           | $\gamma$ | 22.8, CH <sub>2</sub> | 1.89 (m), 2.02 (m)  | 22.7, CH <sub>2</sub> | 1.91 (m), 2.03 (m)  | 22.6, CH <sub>2</sub> | 1.90 (m), 2.02 (m)  |
|           | $\delta$ | 45.4, CH <sub>2</sub> | 3.58 (m), 3.66 (m)  | 45.5, CH <sub>2</sub> | 3.58 (m), 3.67 (m)  | 45.4, CH <sub>2</sub> | 3.58 (m), 3.66 (m)  |
|           | C=O      | 165.9, C              |                     |                       |                     | 165.9, C              |                     |
| C2-Prenyl | 1'       | 25.2, CH <sub>2</sub> | 3.44 (qd)           | 25.2, CH <sub>2</sub> | 3.45 (m)            | 25.0, CH <sub>2</sub> | 3.43 (qd)           |
|           | 2'       | 119.6, CH             | 5.29 (t)            | 119.9, CH             | 5.29 (t)            | 119.8, CH             | 5.26 (t)            |
|           | 3'       | 135.4, C              |                     |                       |                     | 135.4, C              |                     |
|           | 4'       | 18.0, CH <sub>3</sub> | 1.73 (s)            | 18.0, CH <sub>3</sub> | 1.74 (s)            | 17.9, C               | 1.72 (s)            |
|           | 5'       | 25.8, CH <sub>3</sub> | 1.76 (s)            | 25.8, CH <sub>3</sub> | 1.78 (s)            | 25.7                  | 1.76 (s)            |
| C6-Sub    | 1''      | 39.5, CH <sub>2</sub> | 3.62 (d)            | 35.2, CH <sub>2</sub> | 3.65 (d)            | 41.7, CH <sub>2</sub> | 4.02 (s)            |
|           | 2''      | 130.2, CH             | 6.44 (m)            | 127.4, CH             | 6.02 (t)            | 128.9, CH             | 7.08 (s)            |
|           | 3''      | 129.2, CH             | 6.4 (m)             |                       |                     | 128.9, CH             | 7.08 (s)            |
|           | 4''      | 137.7, C              |                     | 125.8, CH             | 7.41 (m)            | 21.0, CH <sub>3</sub> | 2.30 (s)            |
|           | 5''      | 125.9, CH             | 7.35 (d)            | 128.2, CH             | 7.29 (t)            | 128.9, CH             | 7.08 (s)            |
|           | 6''      | 128.2, CH             | 7.27 (t)            | 126.7, CH             | 7.21 (t)            | 128.9, CH             | 7.08 (s)            |
|           | 7''      | 126.8, CH             | 7.18 (t)            | 128.2, CH             | 7.29 (t)            |                       |                     |
|           | 8''      | 128.2, CH             | 7.27 (t)            | 125.8, CH             | 7.41 (m)            |                       |                     |
|           | 9''      | 125.9, CH             | 7.35 (d)            | 16.0, CH <sub>3</sub> | 2.16 (s)            |                       |                     |

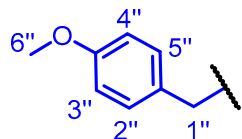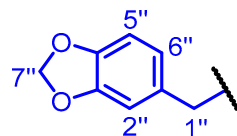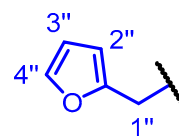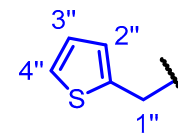

| Segment   | Position  | TPS-52                |                     | TPS-58                 |                     | TPS-61             | TPS-62              | $\delta C$ , type     |
|-----------|-----------|-----------------------|---------------------|------------------------|---------------------|--------------------|---------------------|-----------------------|
|           |           | $\delta C$ , type     | $\delta H$          | $\delta C$ , type      | $\delta H$          | $\delta H$         | $\delta H$          |                       |
| L-Trp     | NH        |                       | 5.62 (s)            |                        |                     | 5.60 (s)           | 5.61 (s)            |                       |
|           | $\alpha$  | 54.5, CH              | 4.33 (dd)           | 54.5, CH               | 4.33 (dd)           | 4.35 (d)           | 4.36 (dd)           | 54.6, CH              |
|           | $\beta$   | 25.0, CH <sub>2</sub> | 2.91 (dd), 3.64 (m) | 25.7, CH <sub>2</sub>  | 2.91 (m), 3.63 (d)  | 2.93 (m), 3.66 (m) | 2.93 (dd), 3.63 (m) | 25.5, CH <sub>2</sub> |
|           | 1         |                       | 7.82 (s)            |                        | 7.91 (s)            | 7.86 (s)           | 7.85 (s)            |                       |
|           | 2         |                       |                     | 136.0, C               |                     |                    |                     |                       |
|           | 3         |                       |                     | 104.5, C               |                     |                    |                     |                       |
|           | 3a        |                       |                     | 126.3, C               |                     |                    |                     |                       |
|           | 4         | 117.7, CH             | 7.37 (d)            | 117.5, CH              | 7.37 (d)            | 7.40 (d)           | 7.40 (d)            | 117.7, CH             |
|           | 5         | 121.2, CH             | 6.95 (d)            | 121.1, CH              | 6.93 (dd)           | 7.00 (d)           | 7.02 (dd)           | 121.1, CH             |
|           | 6         |                       |                     | 135.6, C               |                     |                    |                     |                       |
| 7         | 110.6, CH | 7.05 (s)              | 110.7, CH           | 7.07 (s)               | 7.16 (s)            | 7.16 (s)           | 110.7, CH           |                       |
| 7a        |           |                       | 136.1, C            |                        |                     |                    |                     |                       |
|           | C=O       |                       |                     |                        |                     |                    |                     |                       |
| Proline   | $\alpha$  | 59.7, CH              | 4.04 (t)            | 59.3, CH               | 4.04 (t)            | 4.05 (s)           | 4.05 (t)            | 59.3, CH              |
|           | $\beta$   | 28.5, CH <sub>2</sub> | 2.03 (m), 2.32 (m)  | 28.4, CH <sub>2</sub>  | 2.02 (m), 2.32 (dt) | 2.04 (m), 2.33 (m) | 2.03 (m), 2.31 (m)  | 28.5, CH <sub>2</sub> |
|           | $\gamma$  | 22.6, CH <sub>2</sub> | 1.90 (m), 2.03 (m)  | 22.7, CH <sub>2</sub>  | 1.89 (m), 2.02 (m)  | 1.90 (m), 2.33 (m) | 1.89 (m), 2.01 (m)  | 22.8, CH <sub>2</sub> |
|           | $\delta$  | 45.4, CH <sub>2</sub> | 3.58 (m), 3.66 (m)  | 45.4, CH <sub>2</sub>  | 3.58 (m), 3.66 (m)  | 3.60 (m), 3.66 (m) | 3.58 (t), 3.67 (m)  | 45.4, CH <sub>2</sub> |
|           |           | C=O                   |                     |                        | 165.9, C            |                    |                     |                       |
| C2-Prenyl | 1'        | 25.2, CH <sub>2</sub> | 3.43 (m)            | 25.2, CH <sub>2</sub>  | 3.43 (qd)           | 3.45 (m)           | 3.44 (t)            | 25.0, CH <sub>2</sub> |
|           | 2'        | 119.5, CH             | 5.28 (t)            | 119.8, CH              | 5.27 (m)            | 5.29 (t)           | 5.30 (t)            | 119.7, CH             |
|           | 3'        |                       |                     | 135.5, C               |                     |                    |                     |                       |
|           | 4'        | 18.1, CH <sub>3</sub> | 1.73 (s)            | 18.1, CH <sub>3</sub>  | 1.73 (s)            | 1.74 (s)           | 1.74 (s)            | 17.7, CH <sub>3</sub> |
|           | 5'        | 25.7, CH <sub>3</sub> | 1.76 (s)            | 25.9, CH <sub>3</sub>  | 1.76 (s)            | 1.78 (s)           | 1.78 (s)            | 25.8, CH <sub>3</sub> |
| C6-Sub    | 1''       | 41.1, CH <sub>2</sub> | 4.00 (s)            | 41.8, CH               | 3.96 (s)            | 4.05 (s)           | 4.23 (s)            | 36.3, CH <sub>2</sub> |
|           | 2''       | 129.7, CH             | 7.11 (d)            | 109.2, CH              | 6.66 (m)            | 6.00 (d)           | 6.81 (dd)           | 125.1, CH             |
|           | 3''       | 113.8, CH             | 6.81 (d)            | 145.7, C               |                     | 6.28 (d)           | 6.92 (dd)           | 126.8, CH             |
|           | 4''       | 113.8, CH             | 6.81 (d)            | 147.5, C               |                     | 7.32 (s)           | 7.13 (dd)           | 123.9, CH             |
|           | 5''       | 129.7, CH             | 7.11 (d)            | 108.0, CH              | 6.71 (d)            |                    |                     |                       |
|           | 6''       | 55.2, CH <sub>3</sub> | 3.77 (s)            | 121.5, CH              | 6.66 (m)            |                    |                     |                       |
|           | 7''       |                       |                     | 100.8, CH <sub>2</sub> | 5.88 (s)            |                    |                     |                       |

# NMR Spectra for Tryprostatin Analogs:

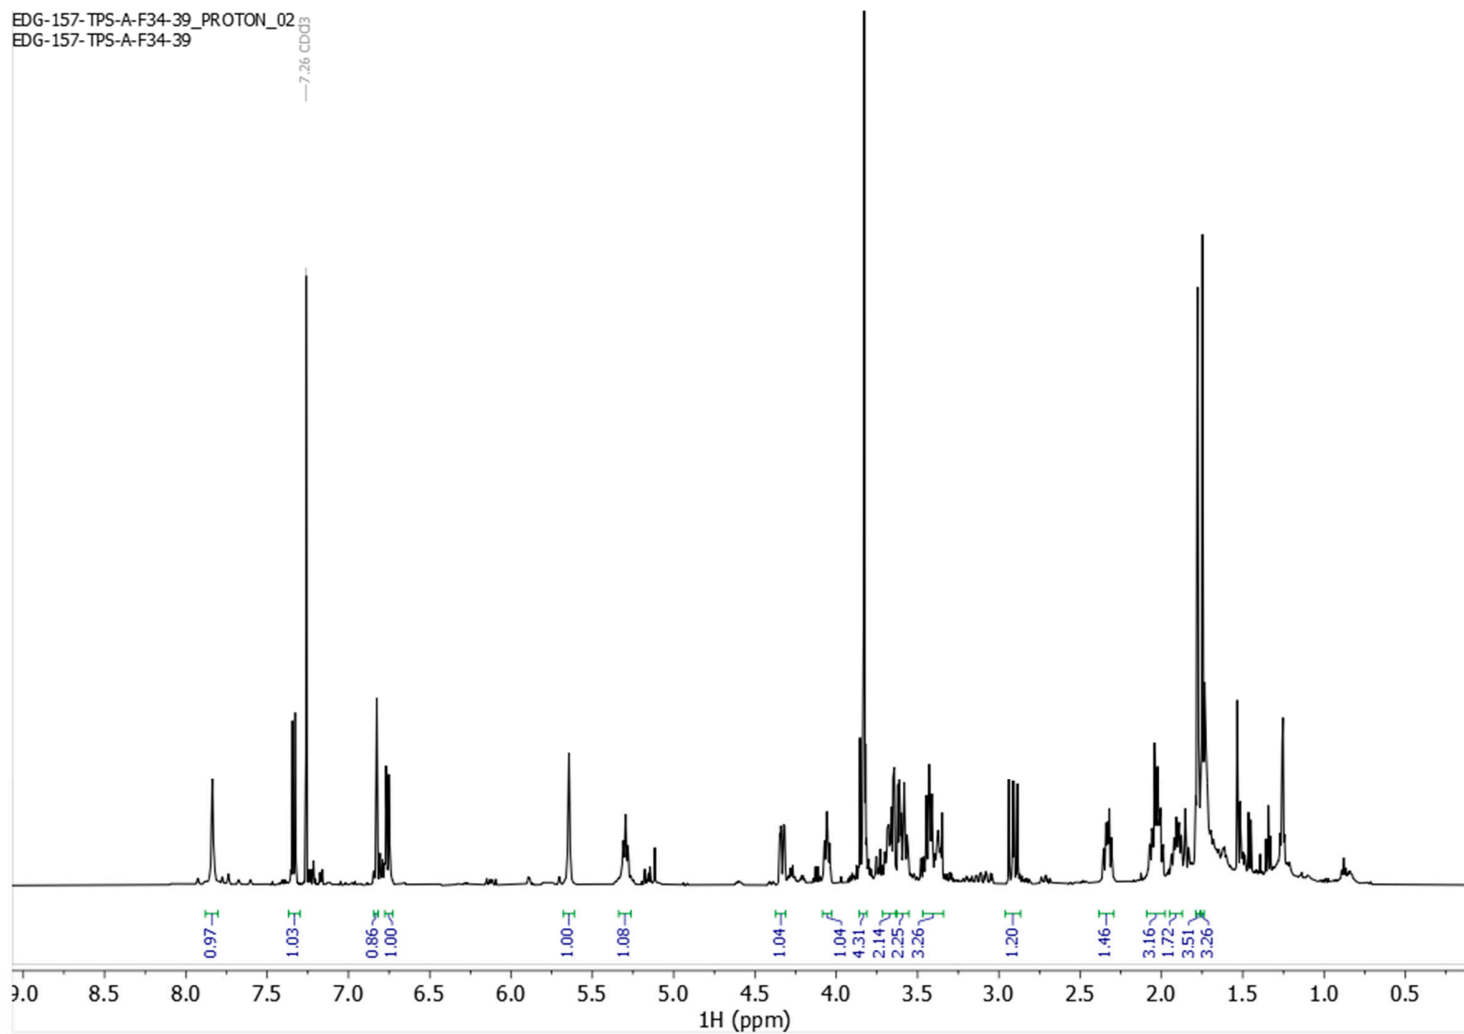

<sup>1</sup>H NMR spectrum (500 MHz) of TPS-A in CDCl<sub>3</sub>

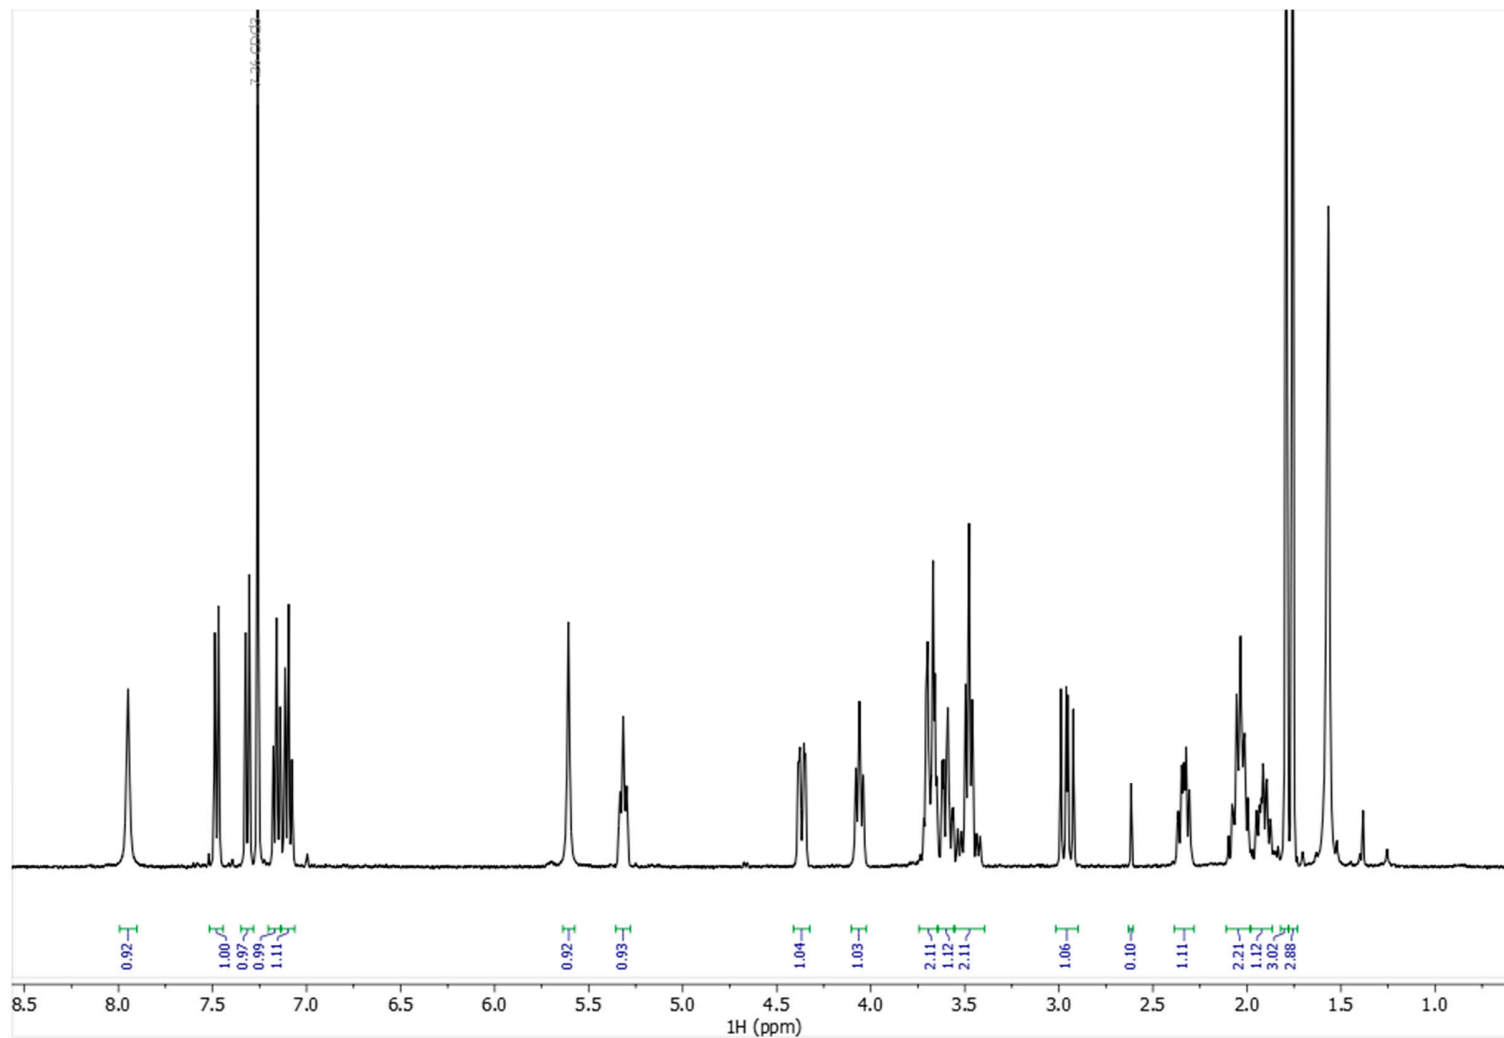

$^1\text{H}$  NMR spectrum (400 MHz) of **TPS-B** in  $\text{CDCl}_3$

EDG-TPS-2-F55-Major\_PROTON\_01  
EDG-TPS-2-F55-Major

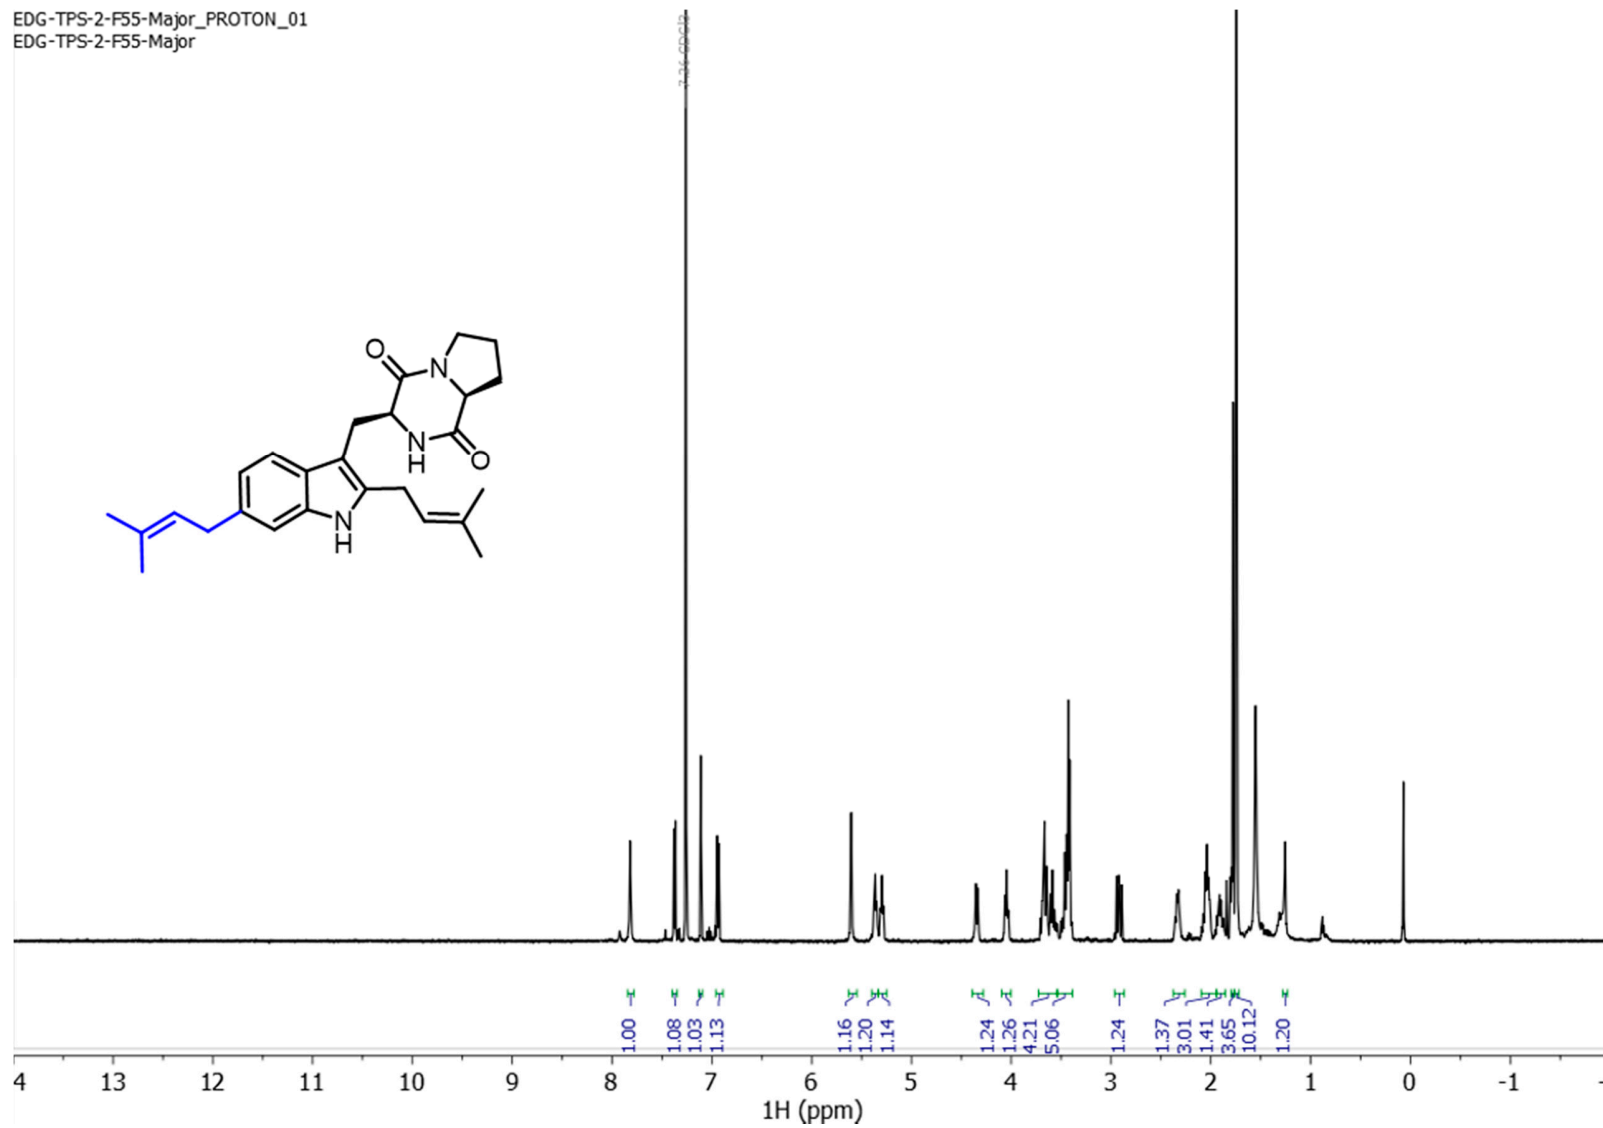

<sup>1</sup>H NMR spectrum (500 MHz) of TPS-2-C6 in CDCl<sub>3</sub>

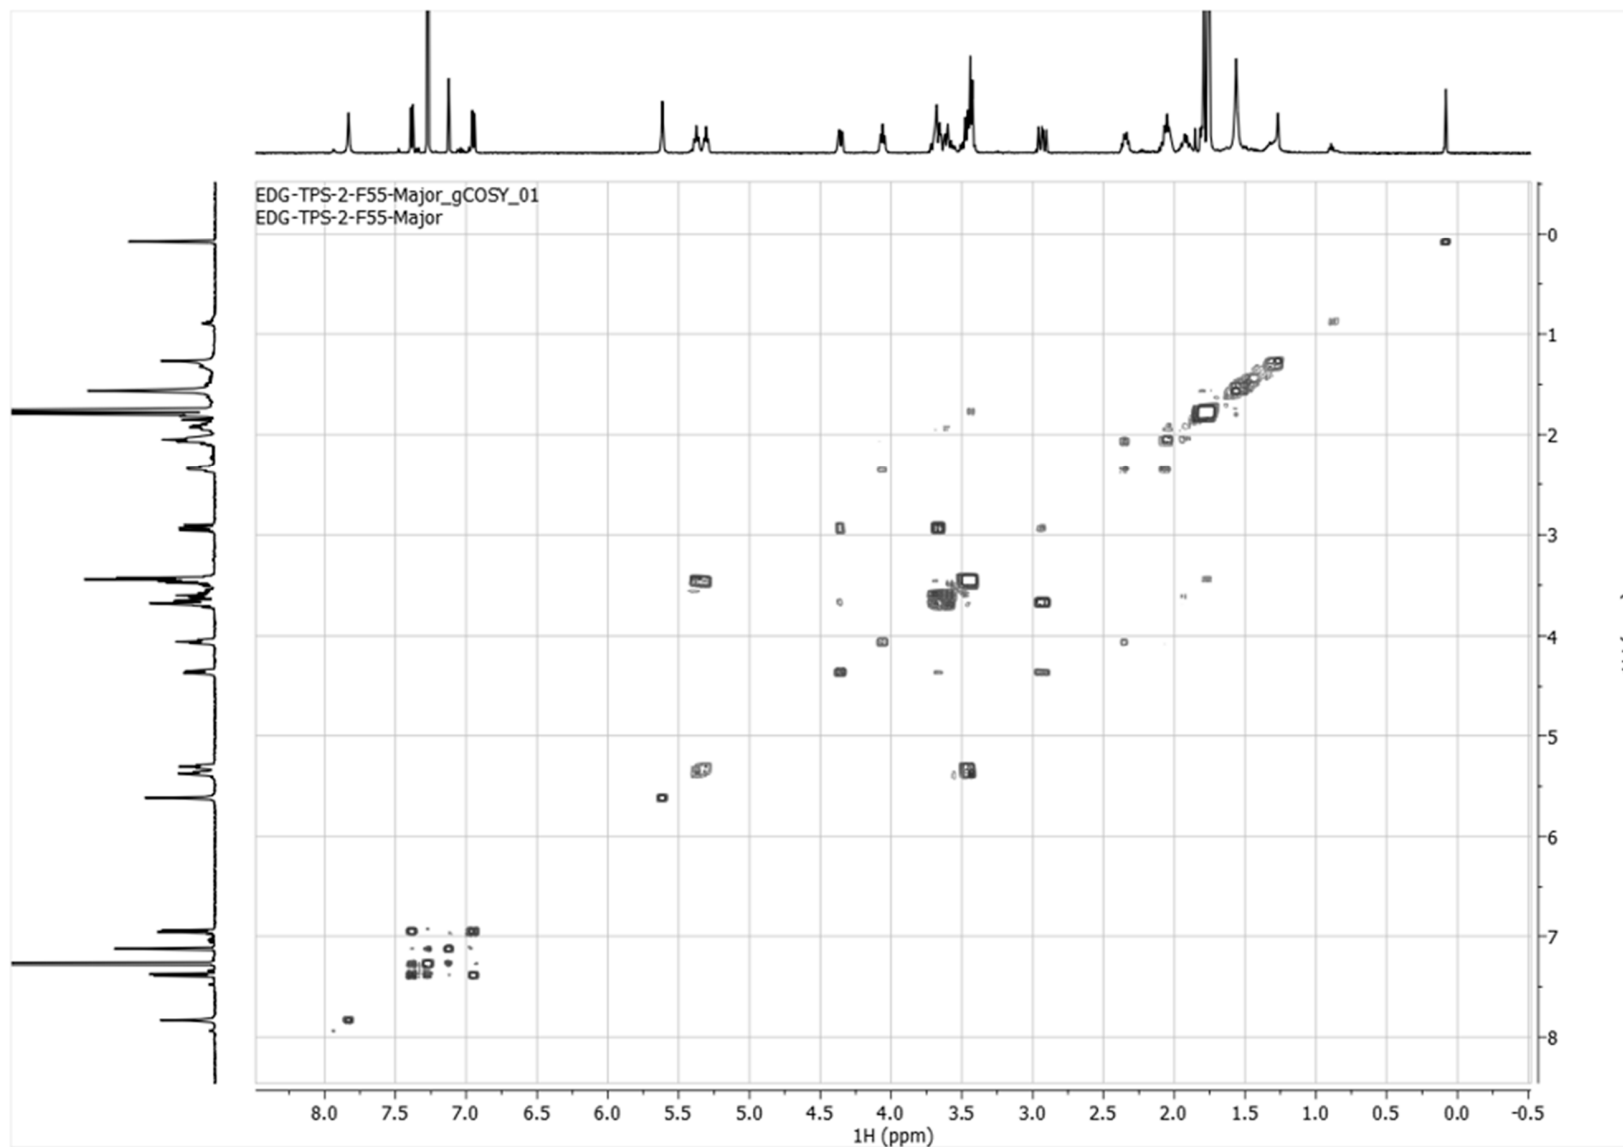

COSY NMR spectrum (500 MHz) of TPS-2-C6 in CDCl<sub>3</sub>

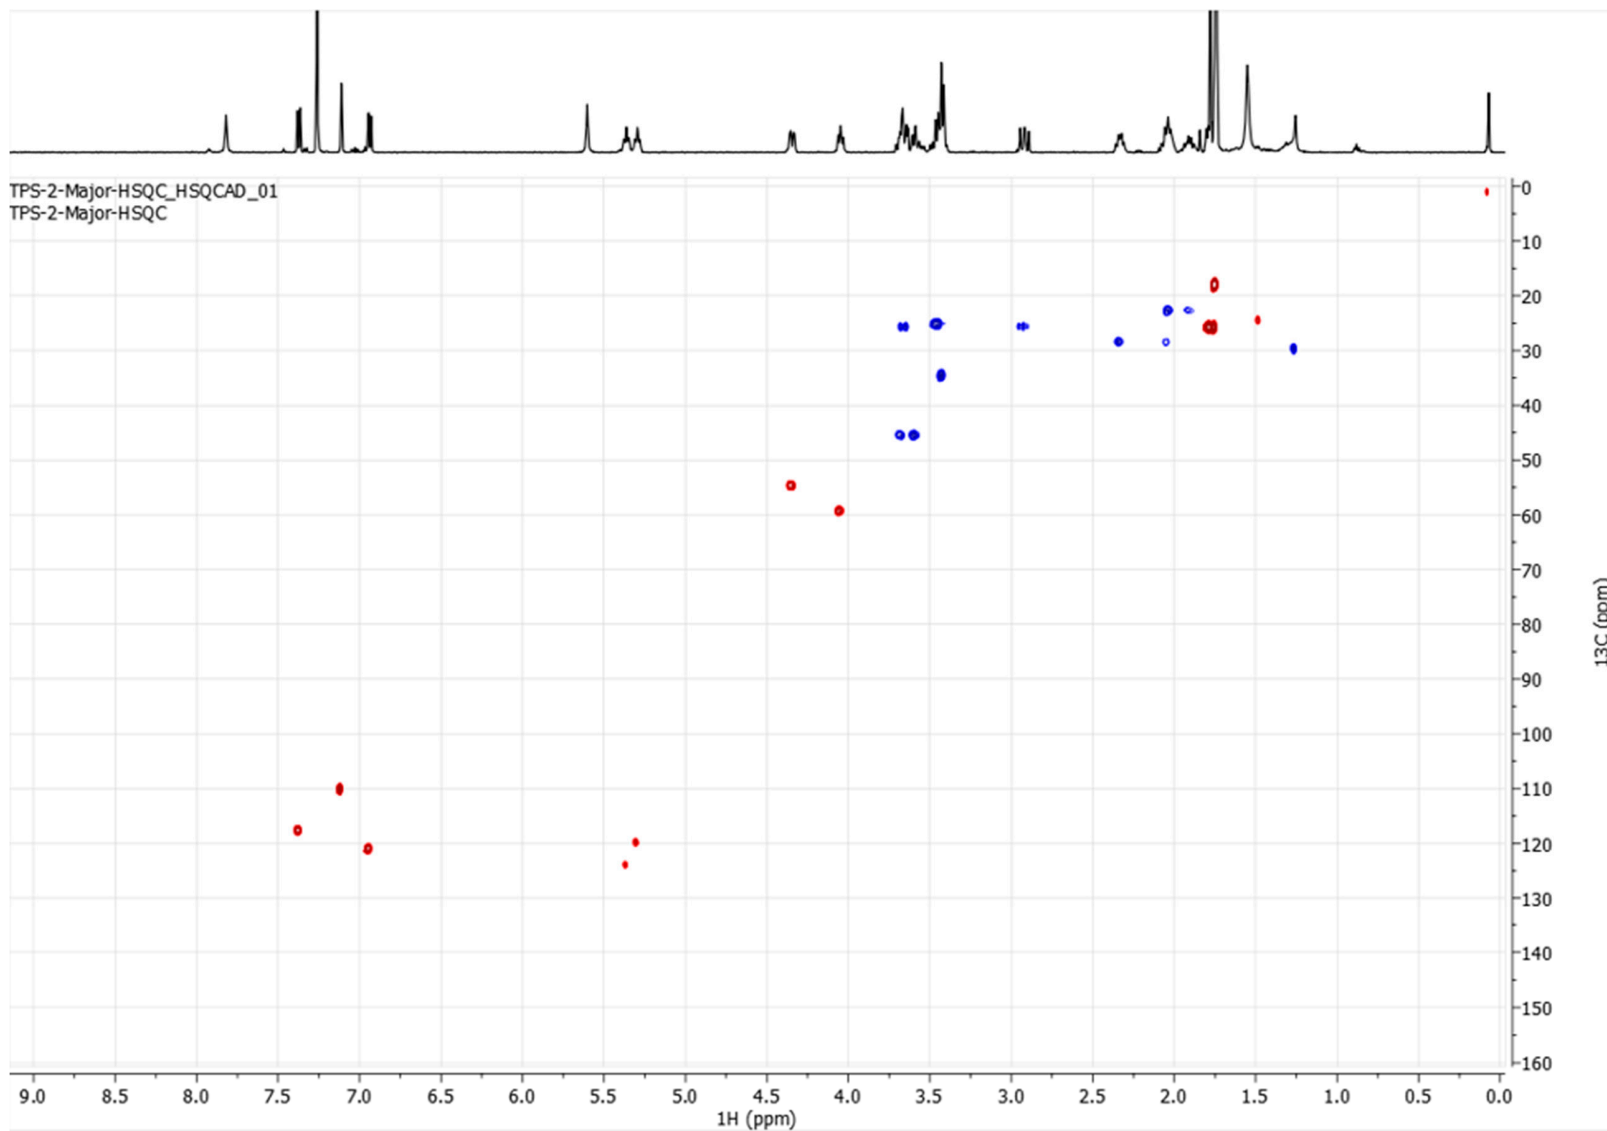

HSQC NMR spectrum (500 MHz) of TPS-2-C6 in  $\text{CDCl}_3$



TPS-2-F22\_minor\_PROTON\_02  
TPS-2-F22\_minor

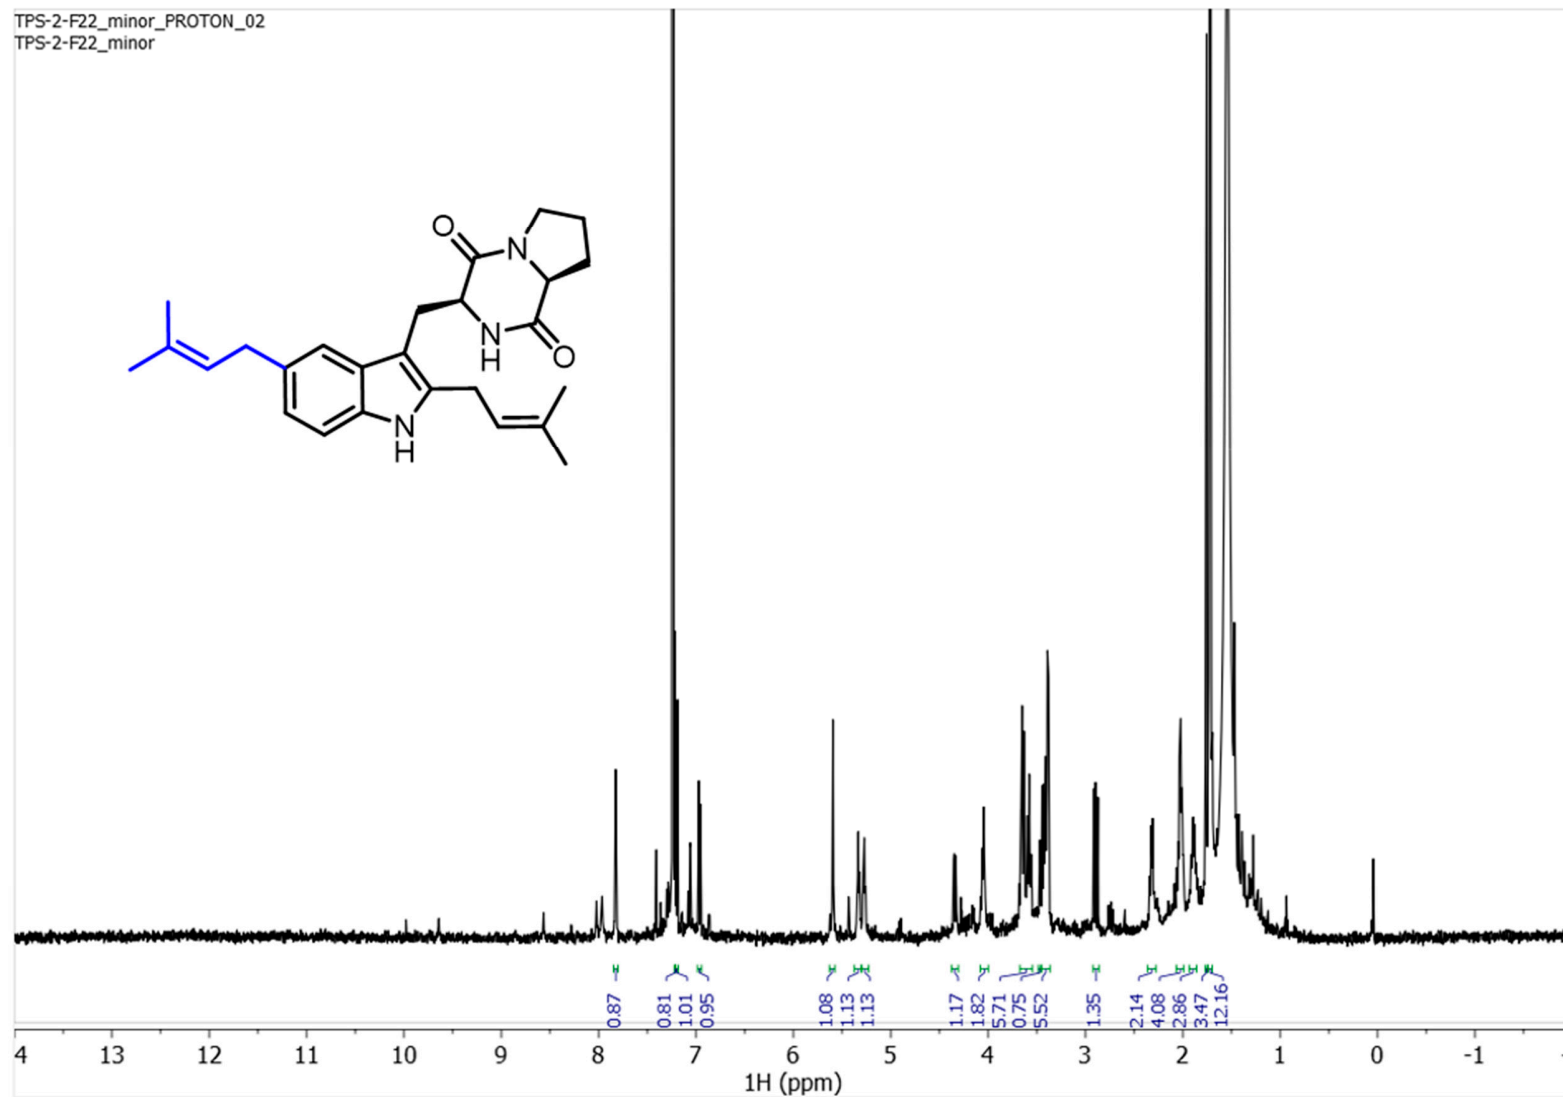

$^1\text{H}$  NMR spectrum (500 MHz) of TPS-2-C5 in  $\text{CDCl}_3$

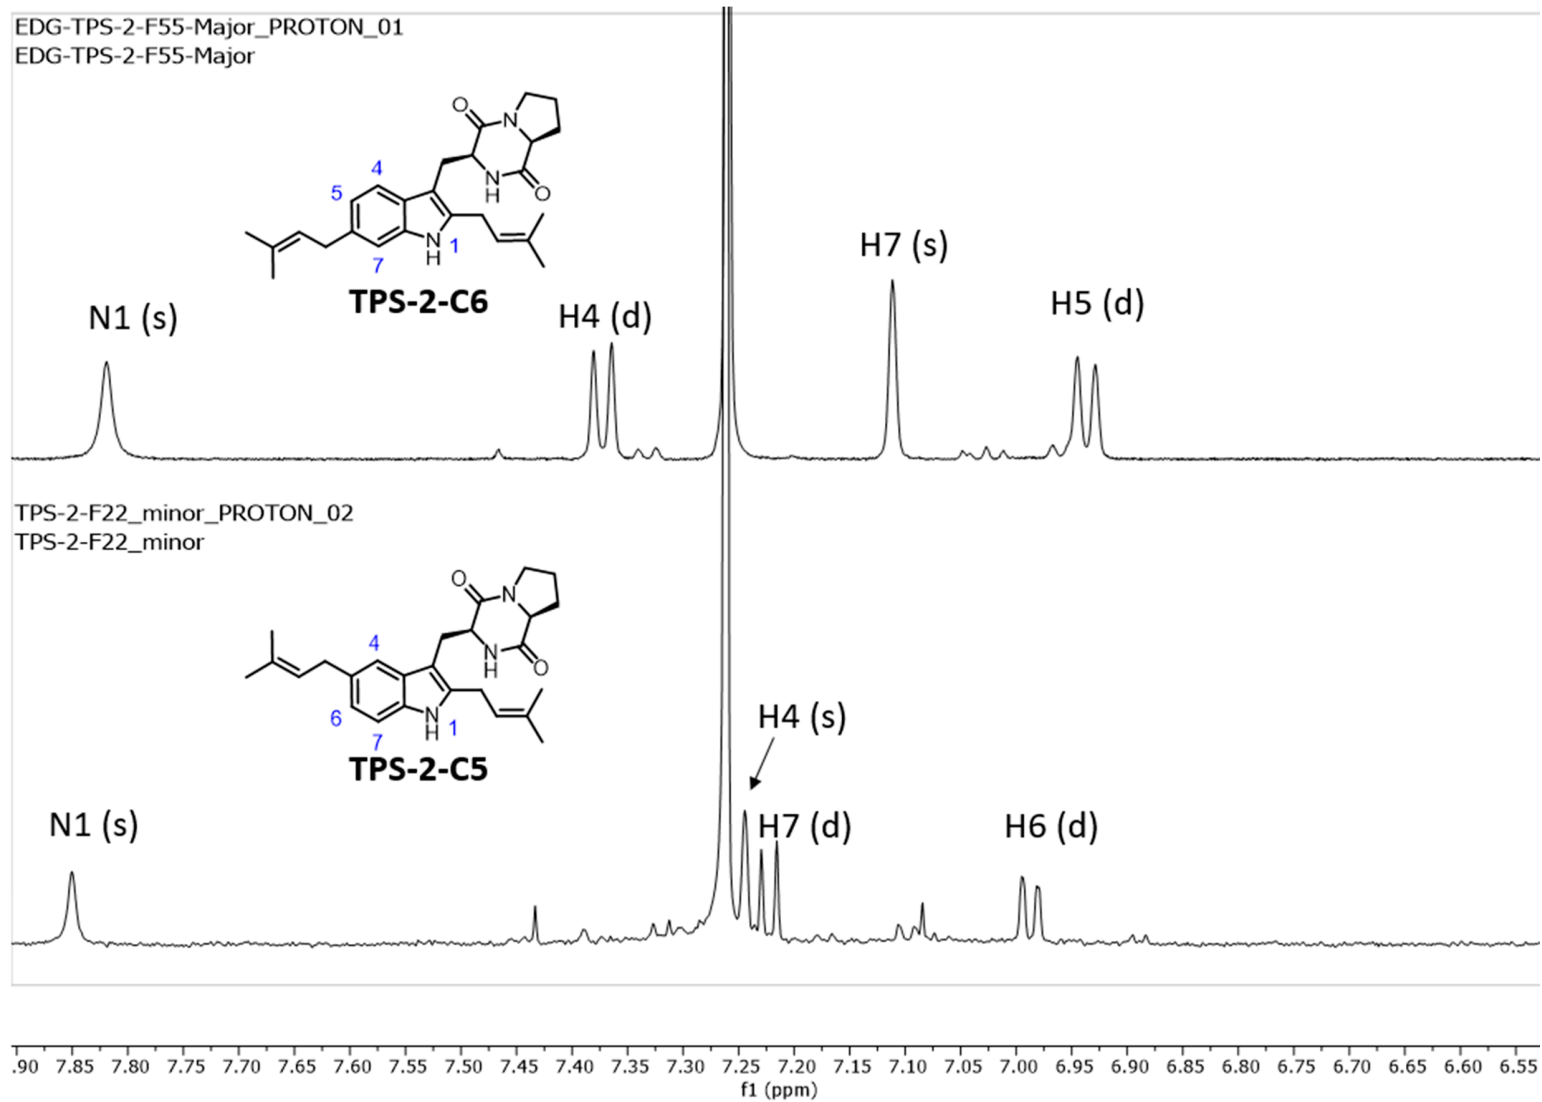

Stacked  $^1\text{H}$  NMR Spectra (500 MHz) of isolated **TPS-2** regioisomers in  $\text{CDCl}_3$

EDG-TPS-3-F52\_PROTON\_01  
EDG-TPS-3-F52

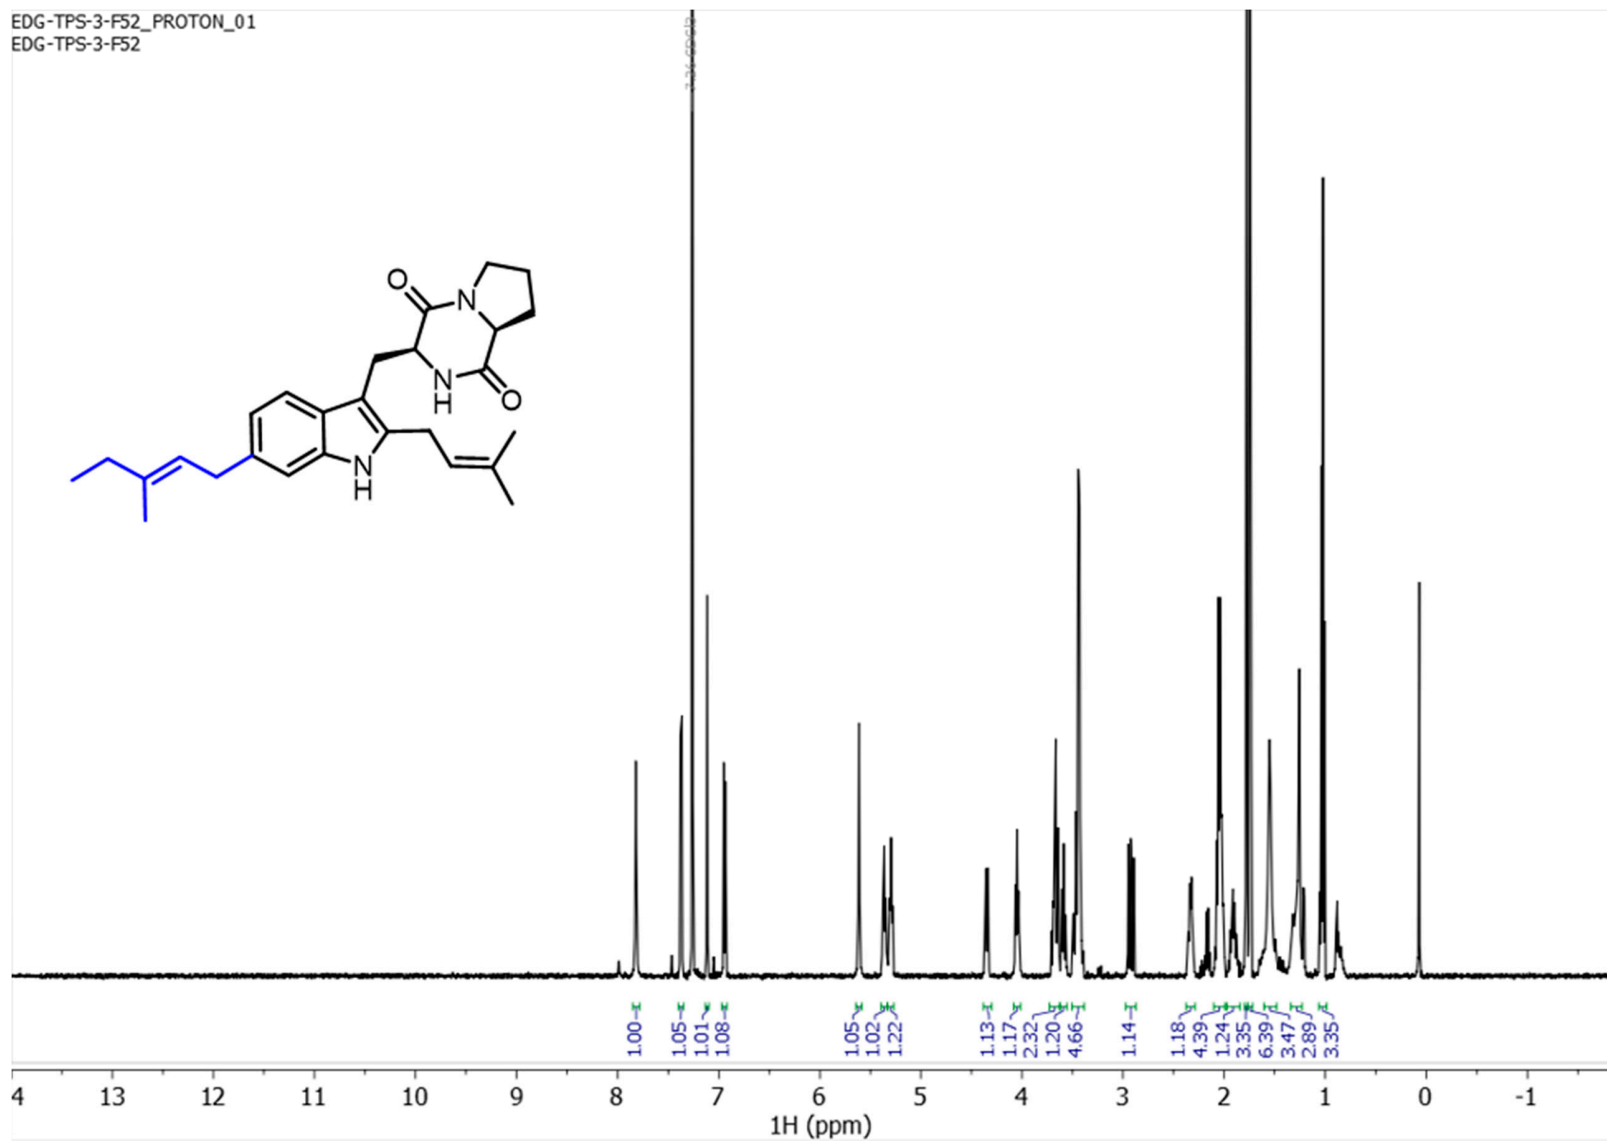

<sup>1</sup>H NMR spectrum (500 MHz) of TPS-7 in CDCl<sub>3</sub>

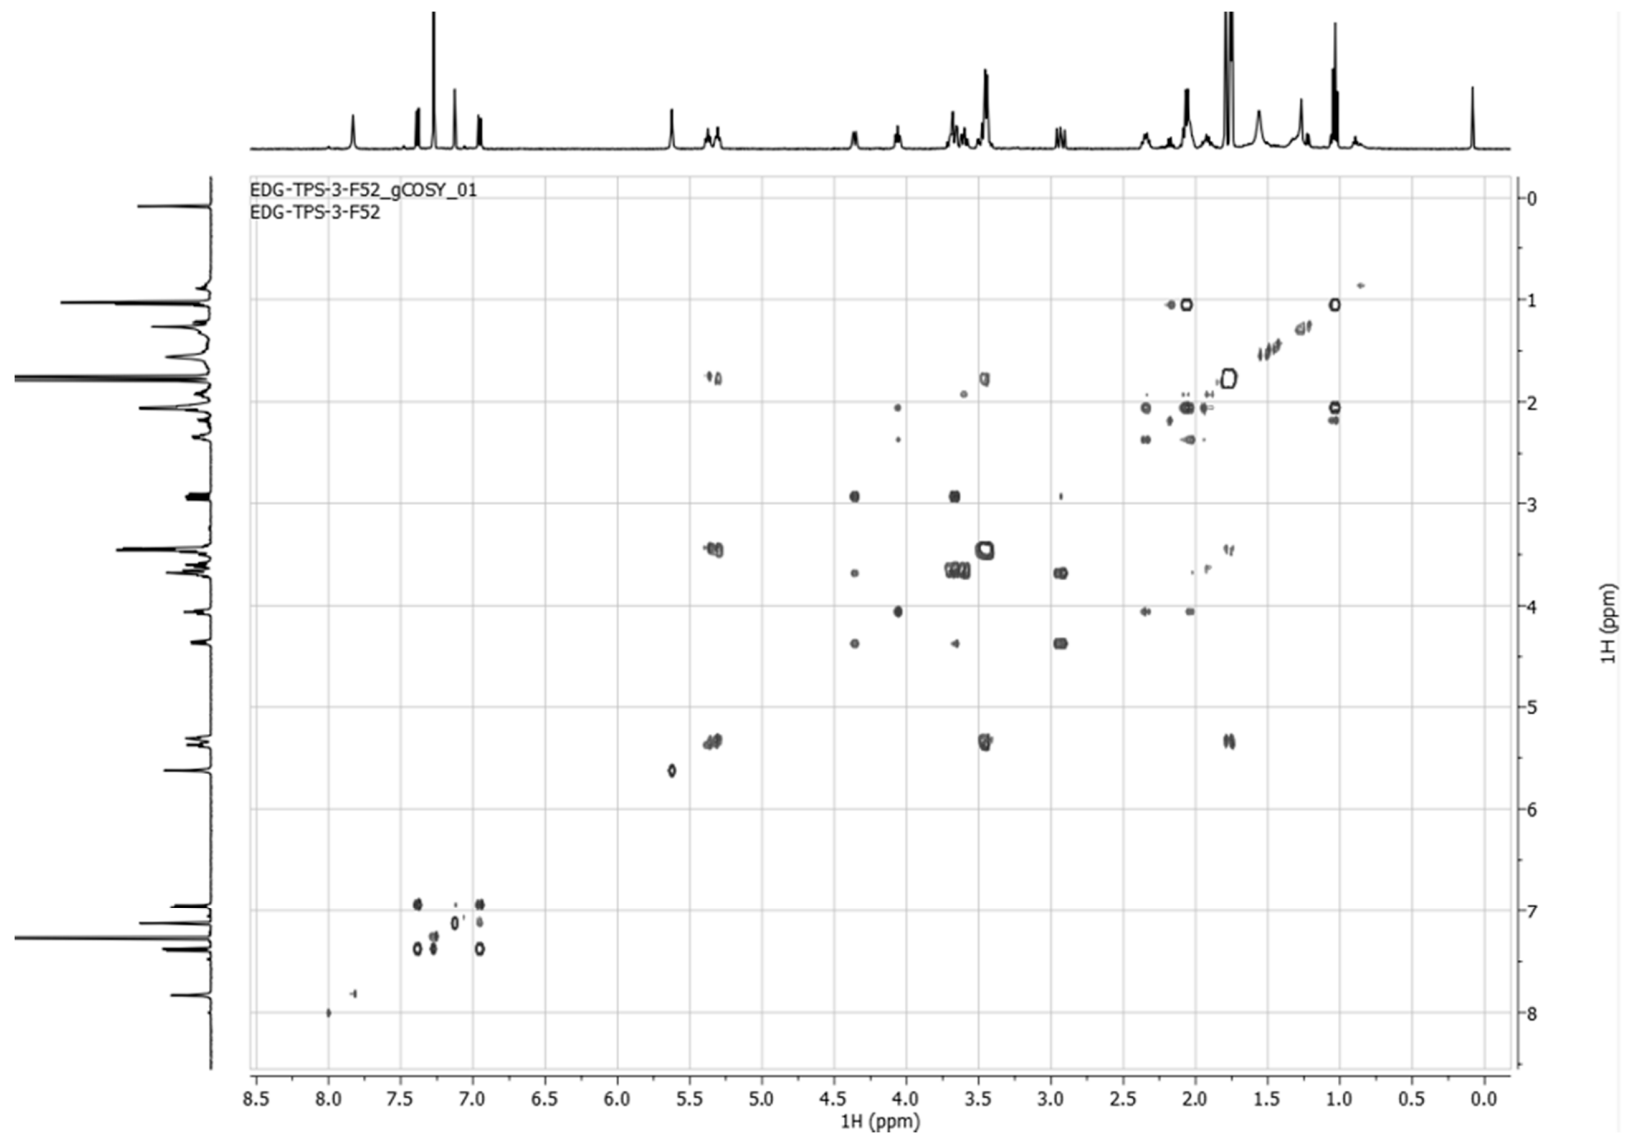

COSY spectrum (500 MHz) of **TPS-7** in  $\text{CDCl}_3$

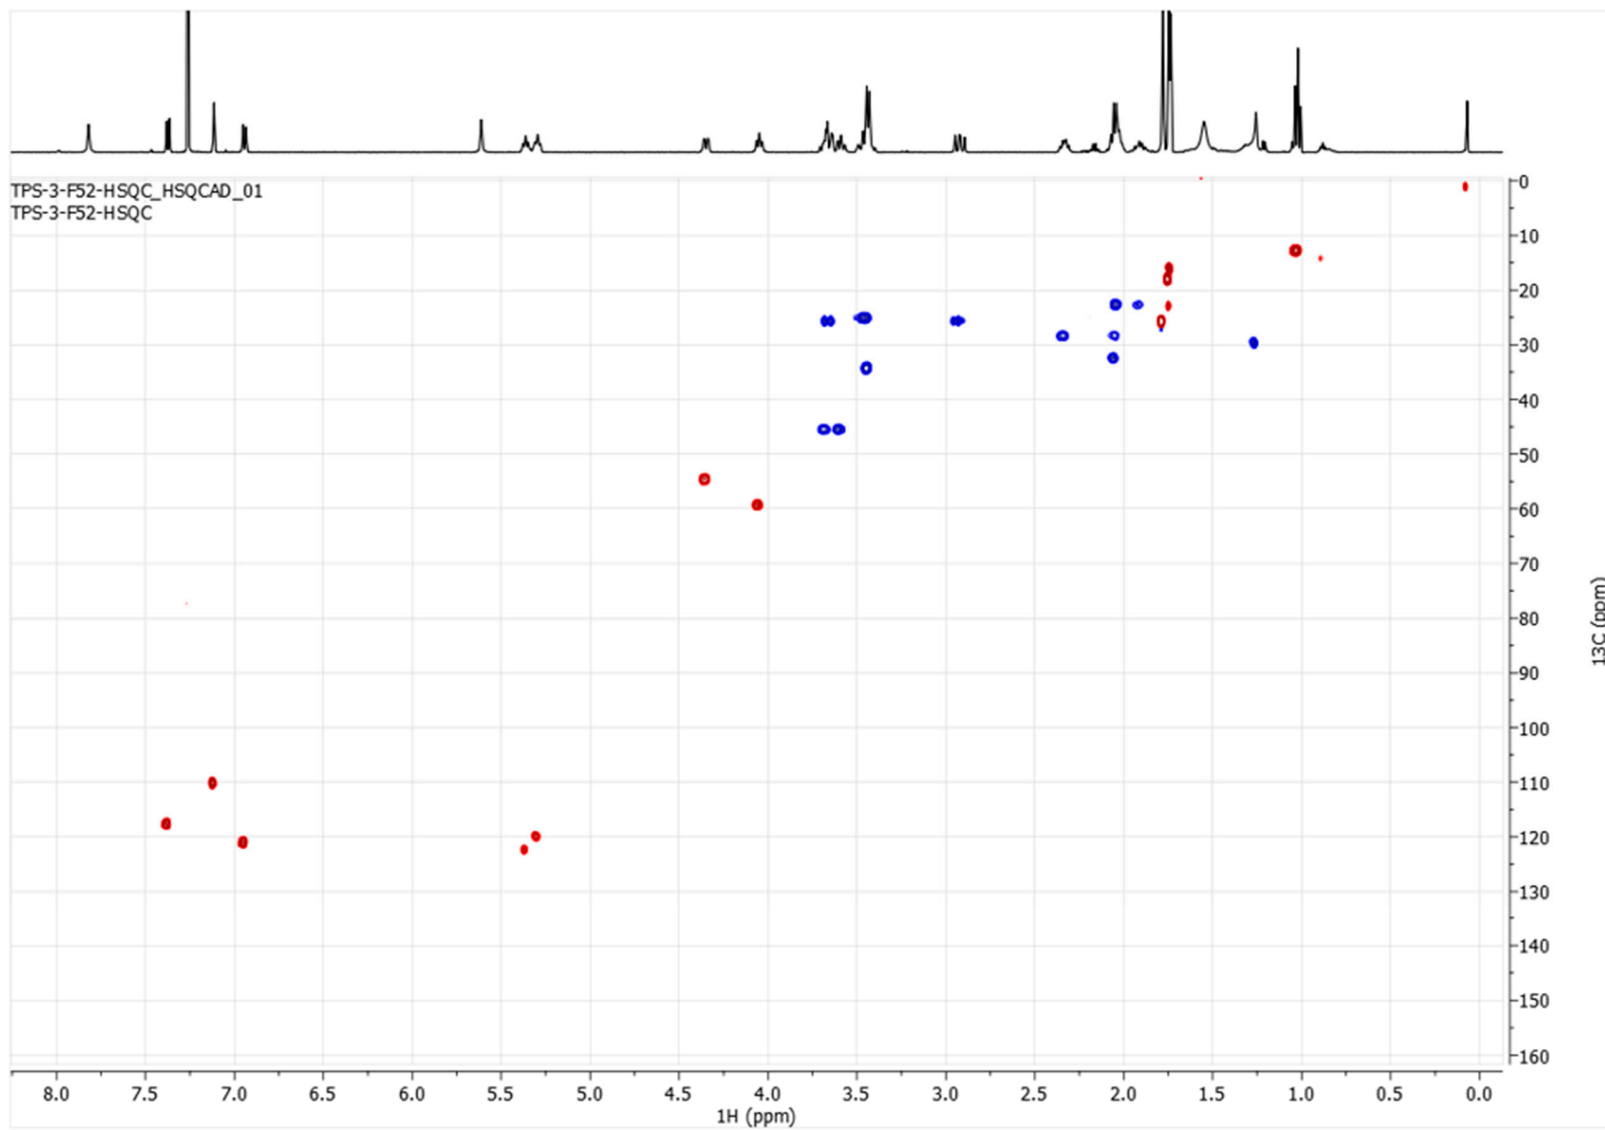

HSQC NMR spectrum (500 MHz) of **TPS-7** in  $\text{CDCl}_3$

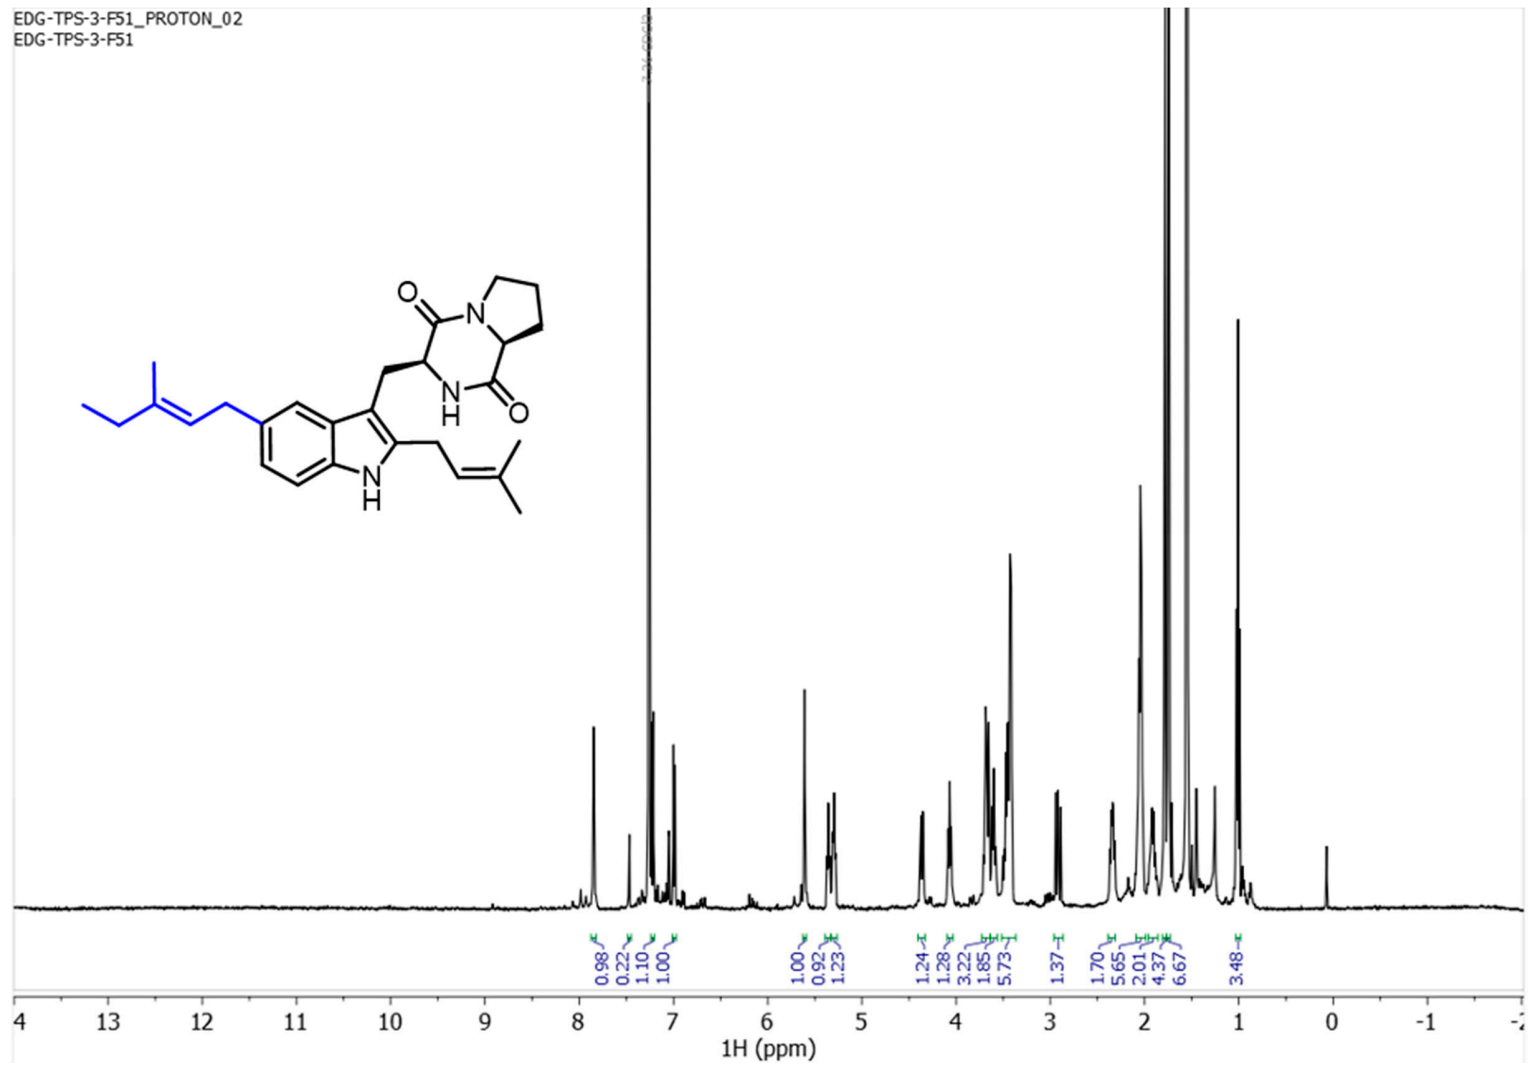

<sup>1</sup>H NMR spectrum (500 MHz) of TPS-7-C5 (minor product) in CDCl<sub>3</sub>.

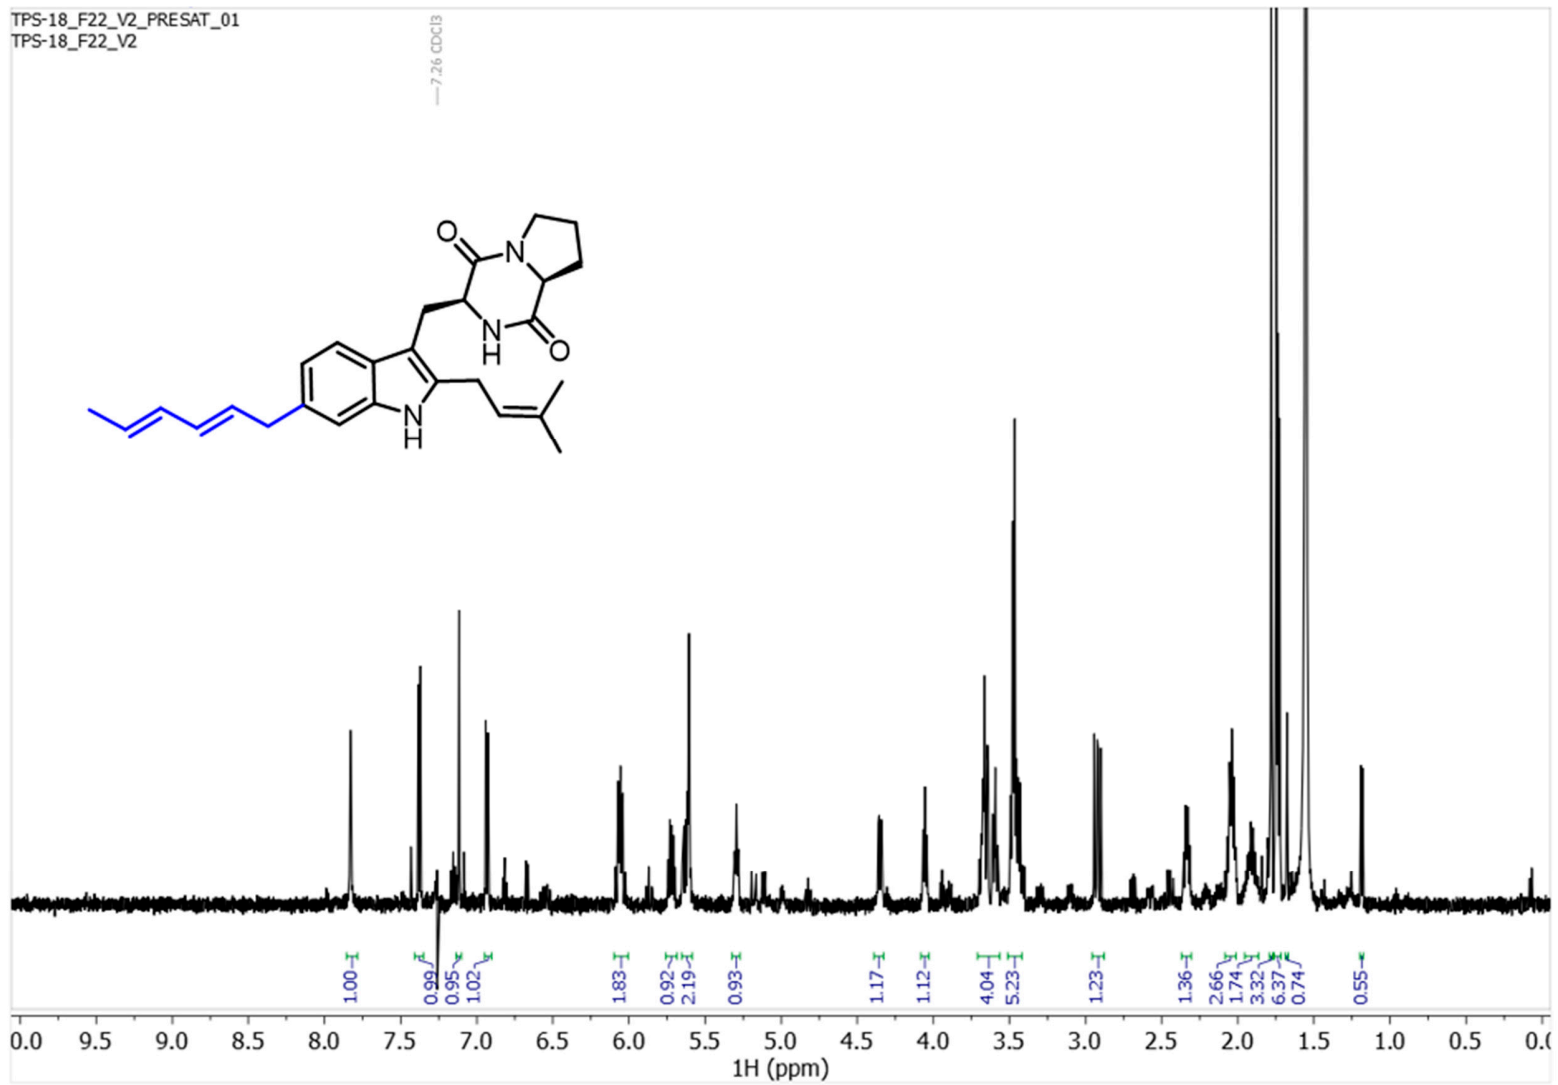

<sup>1</sup>H PRESAT NMR spectrum (500 MHz) of TPS-16 in CDCl<sub>3</sub>

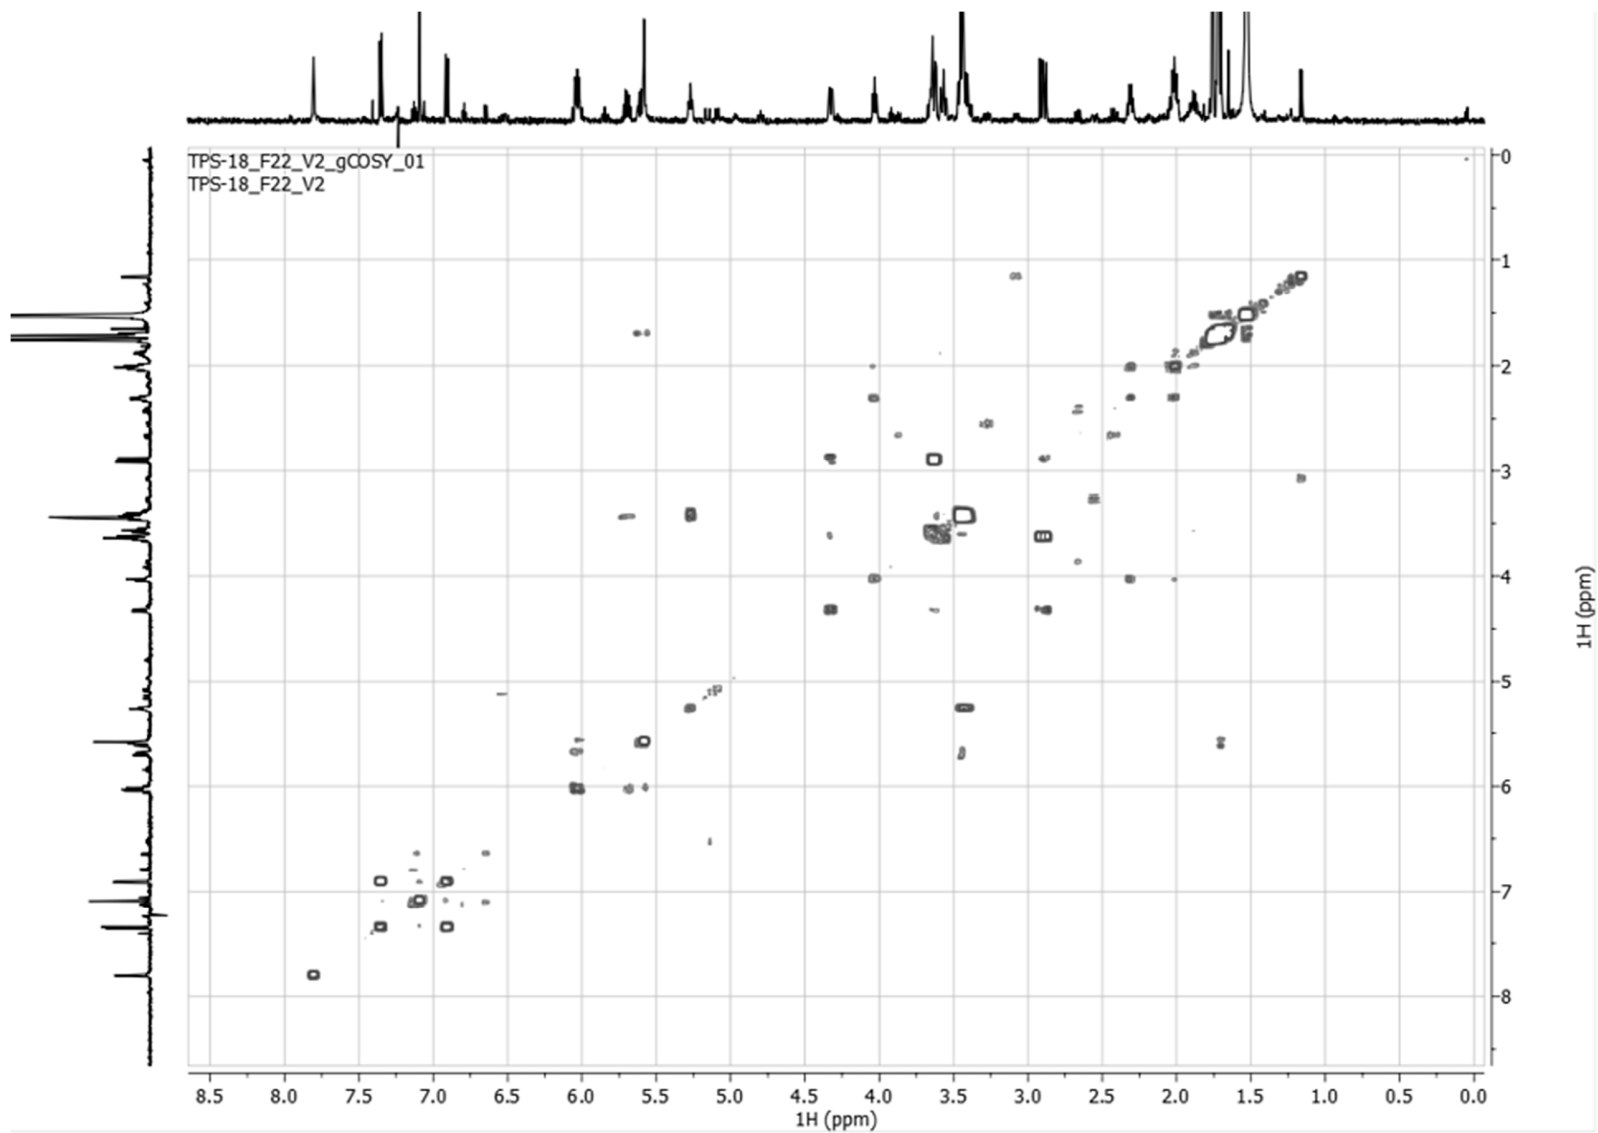

COSY NMR spectrum (500 MHz) of **TPS-16** in  $\text{CDCl}_3$



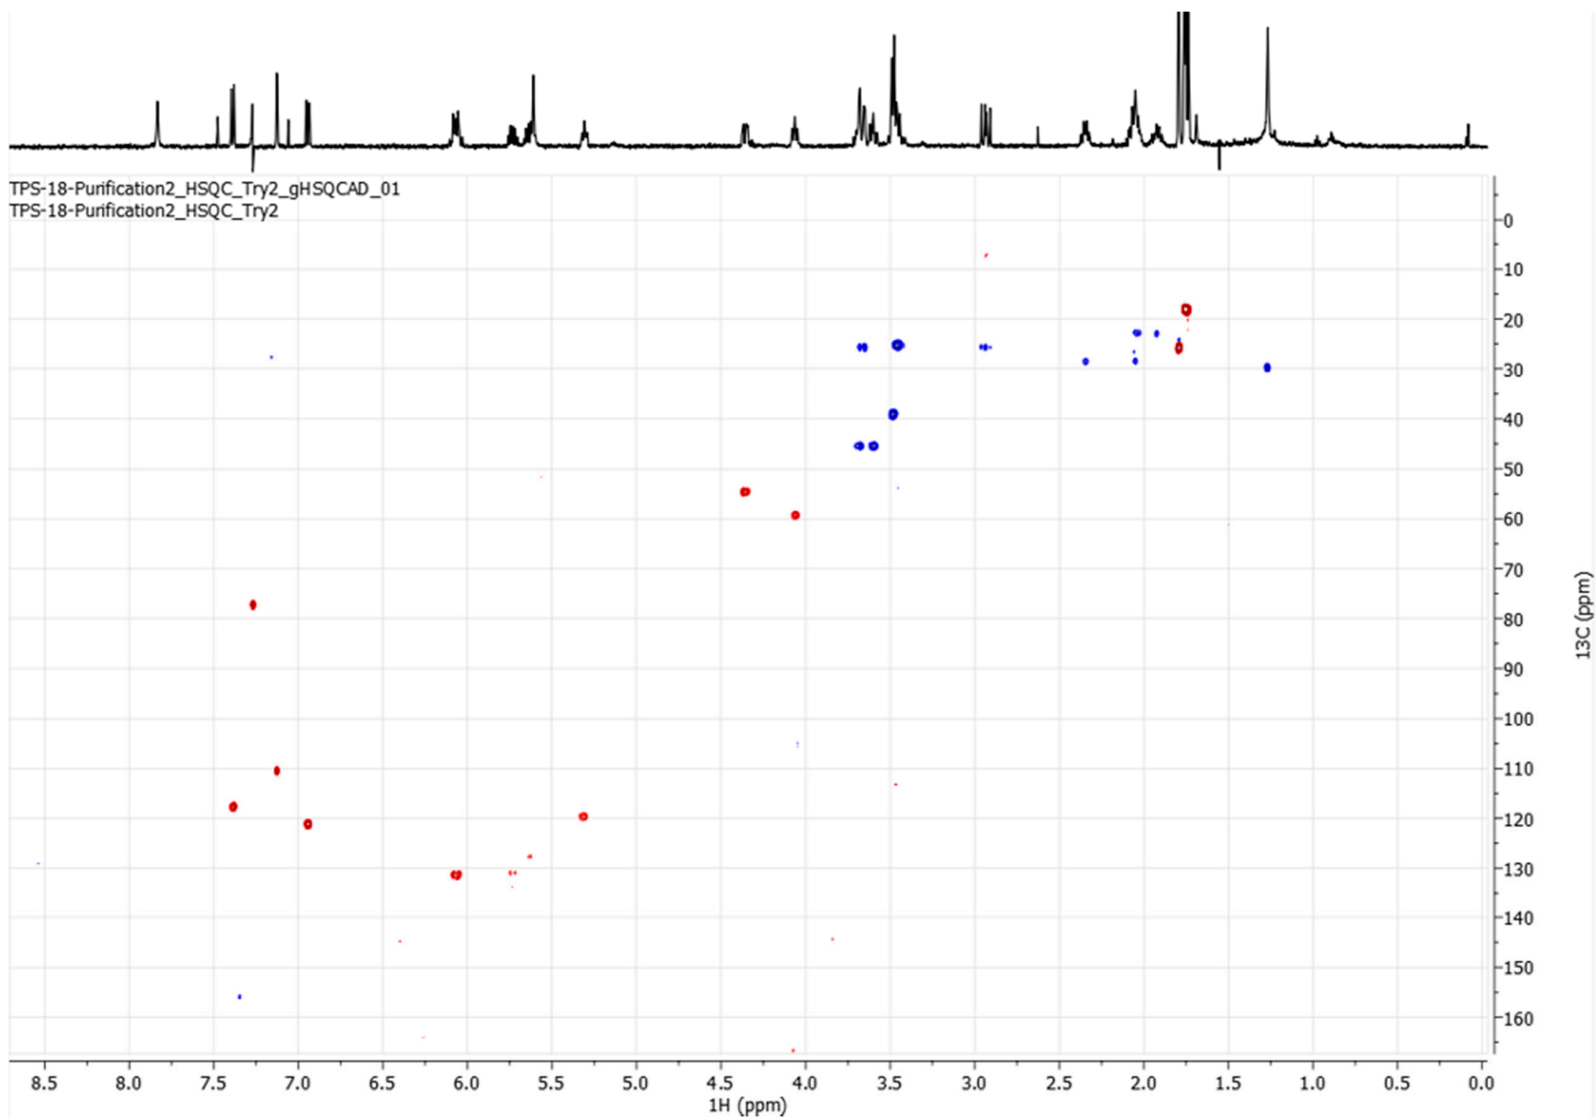

HSQC NMR spectrum (500 MHz) of **TPS-16** in  $\text{CDCl}_3$

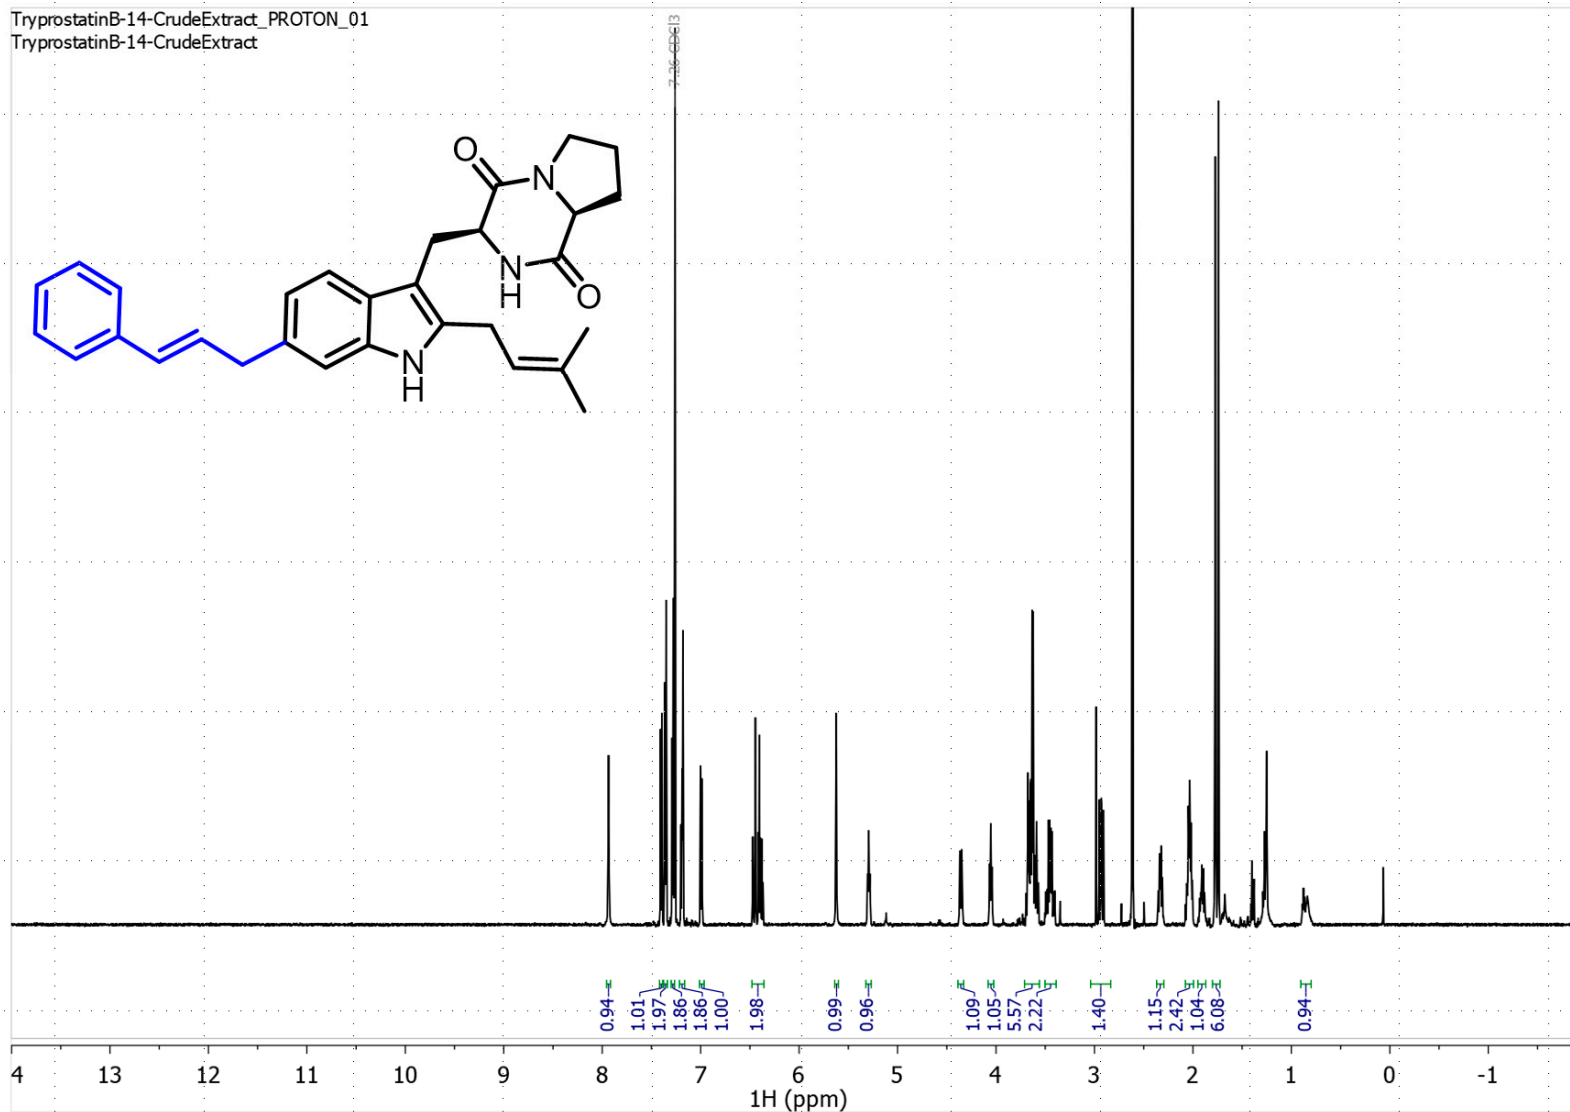

<sup>1</sup>H NMR spectrum (600 MHz) of TPS-24 in CDCl<sub>3</sub>

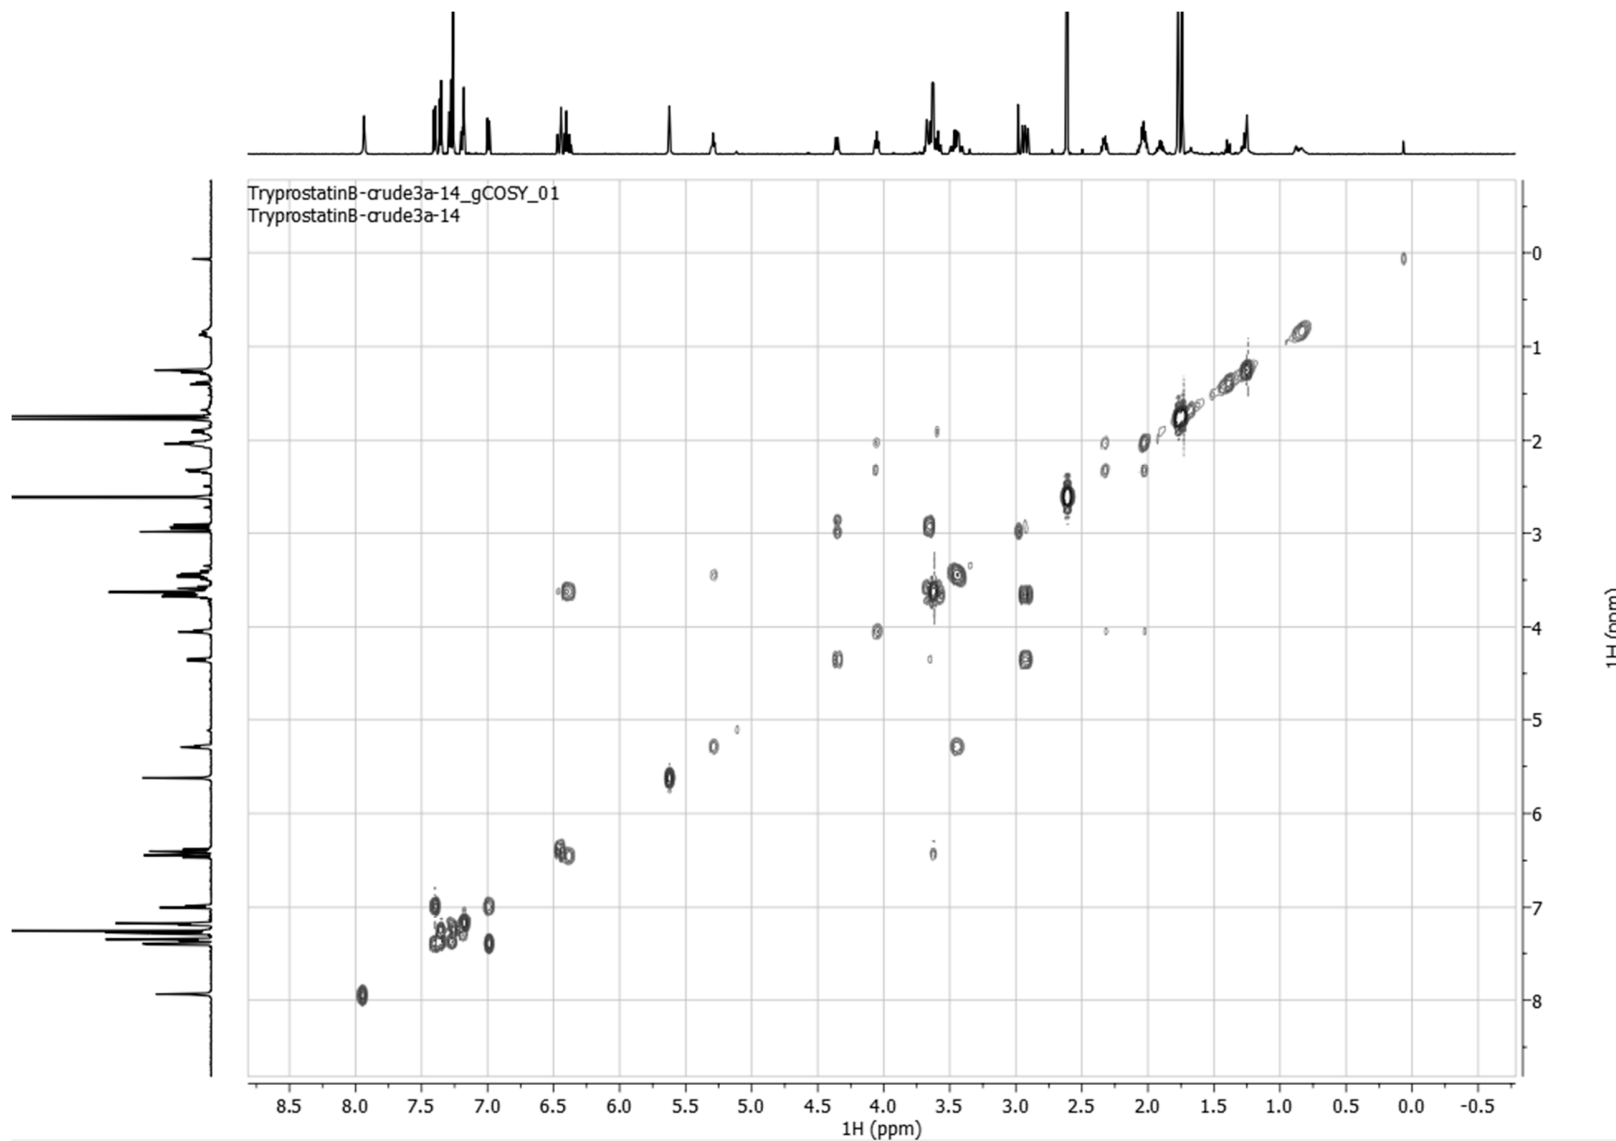

COSY NMR spectrum (600 MHz) of **TPS-24** in  $\text{CDCl}_3$

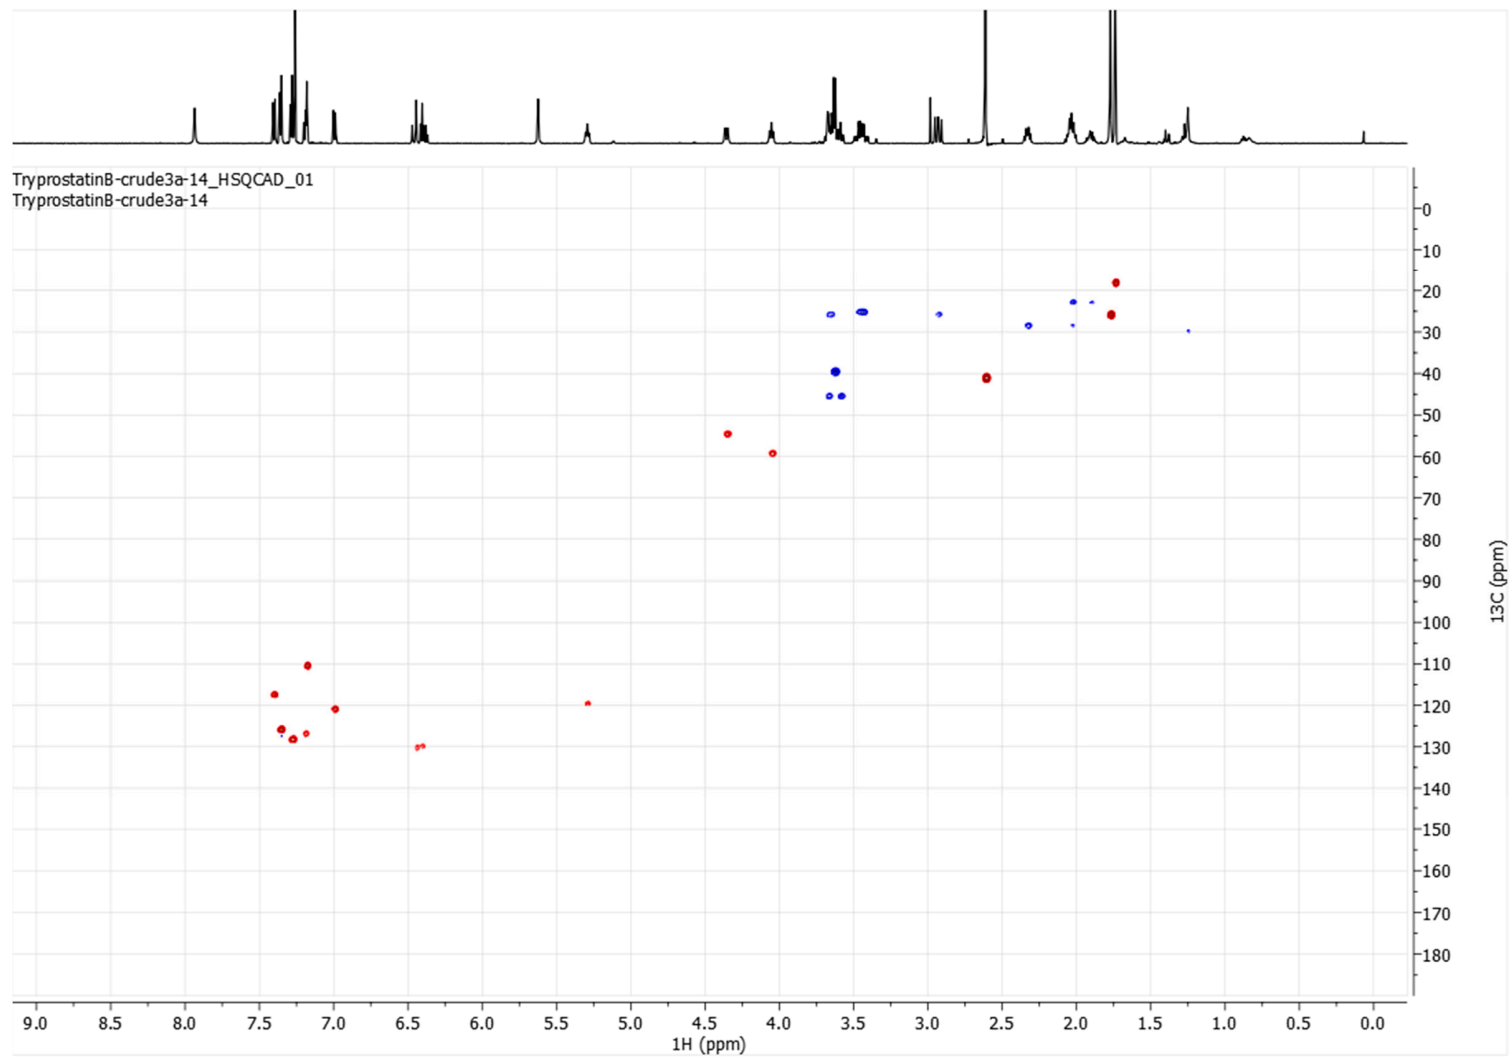

HSQC NMR spectrum (600 MHz) of **TPS-24** in CDCl<sub>3</sub>

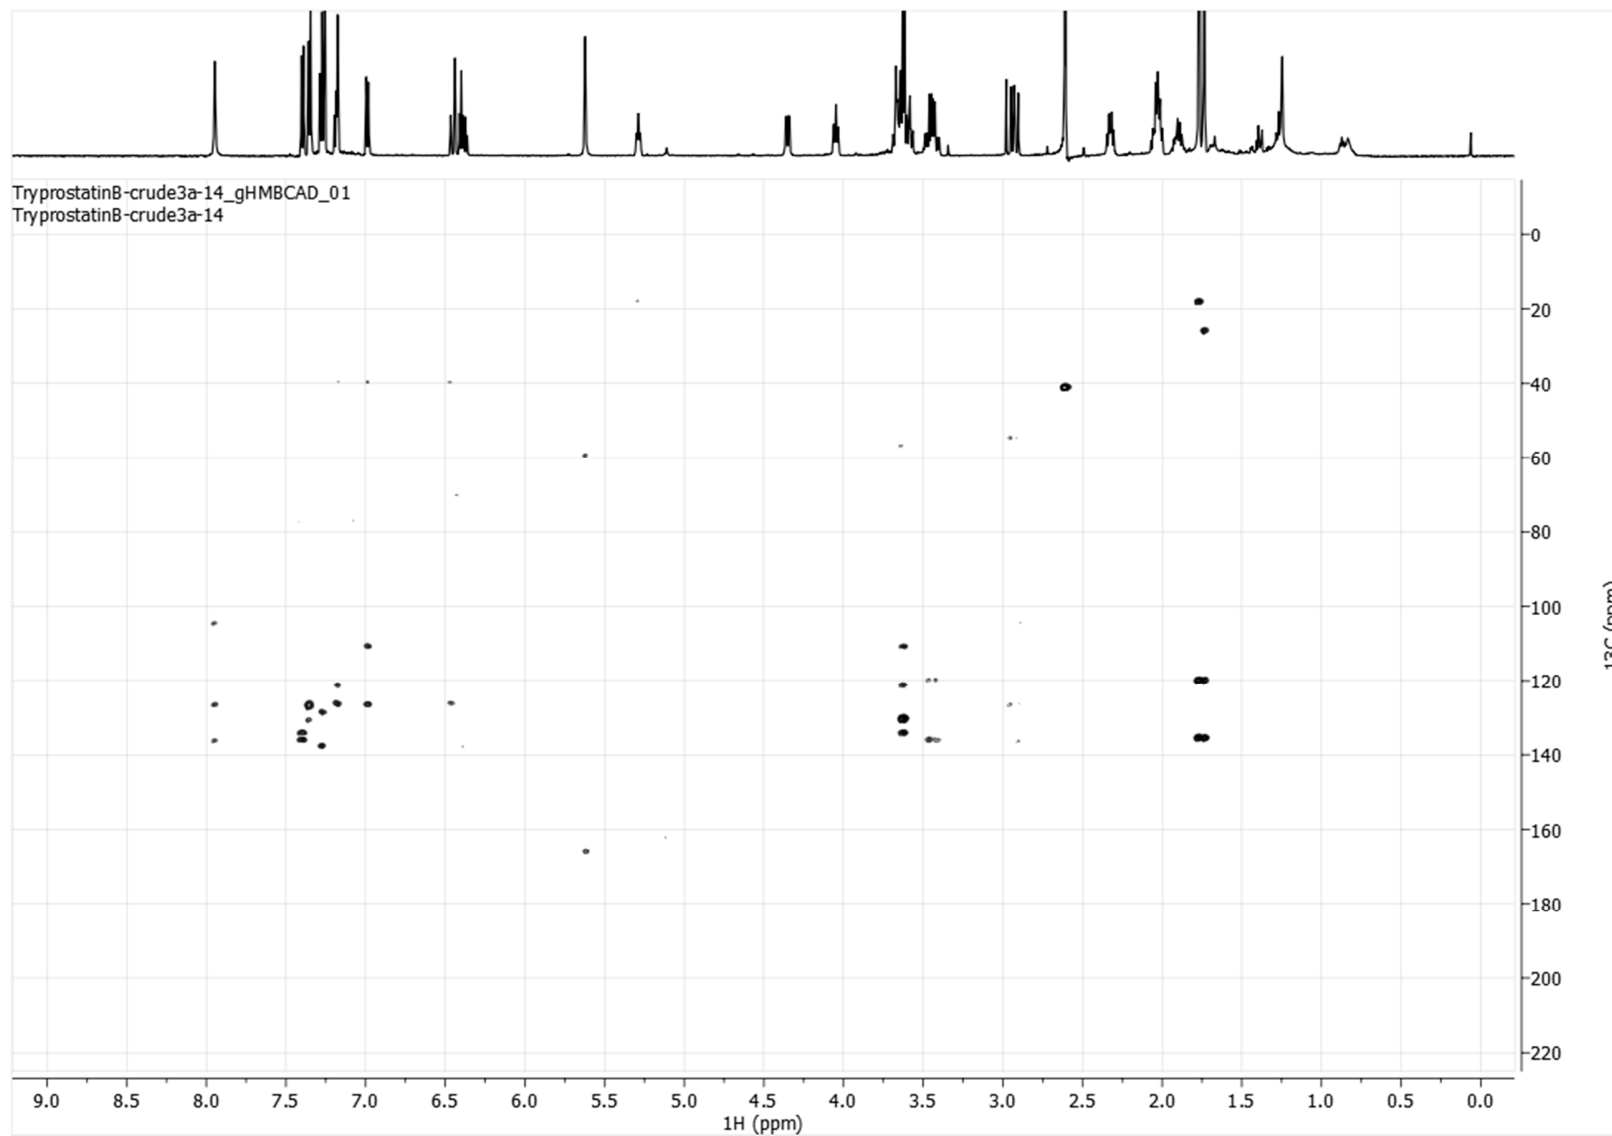

HMBC NMR spectrum (600 MHz) of **TPS-24** in  $\text{CDCl}_3$

TPS-B\_7-OPP\_PROTON\_GOOD  
TPS-B\_7-OPP

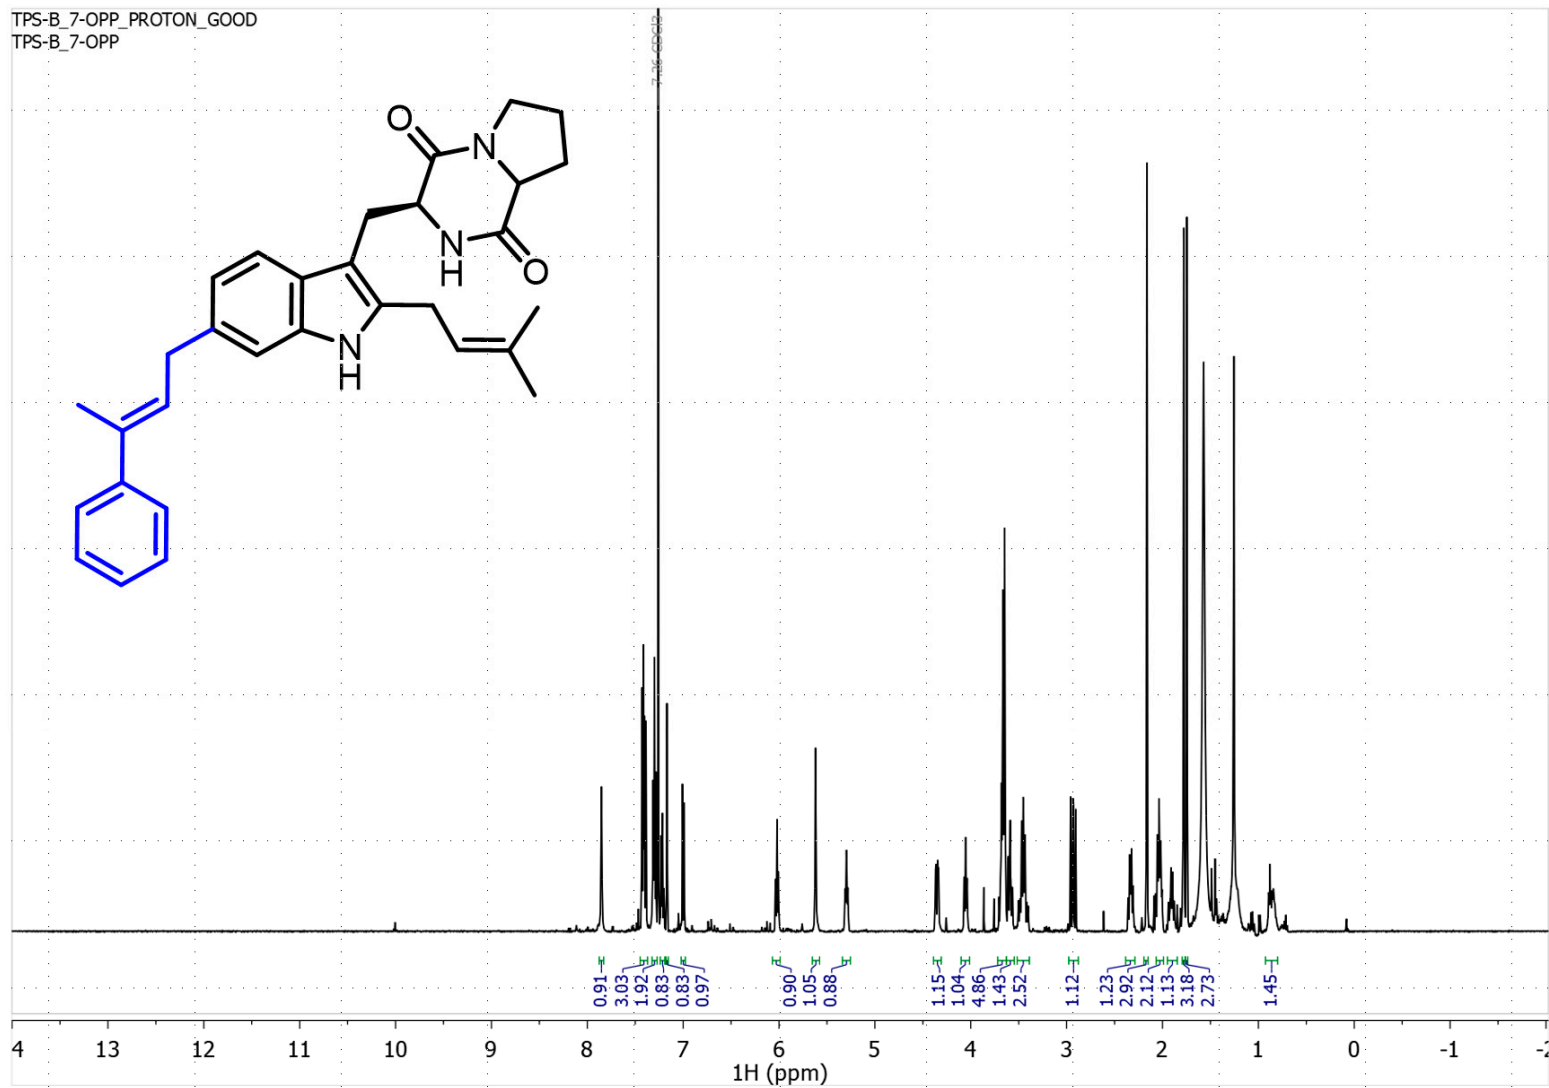

<sup>1</sup>H NMR spectrum (500 MHz) of TPS-25 in CDCl<sub>3</sub>

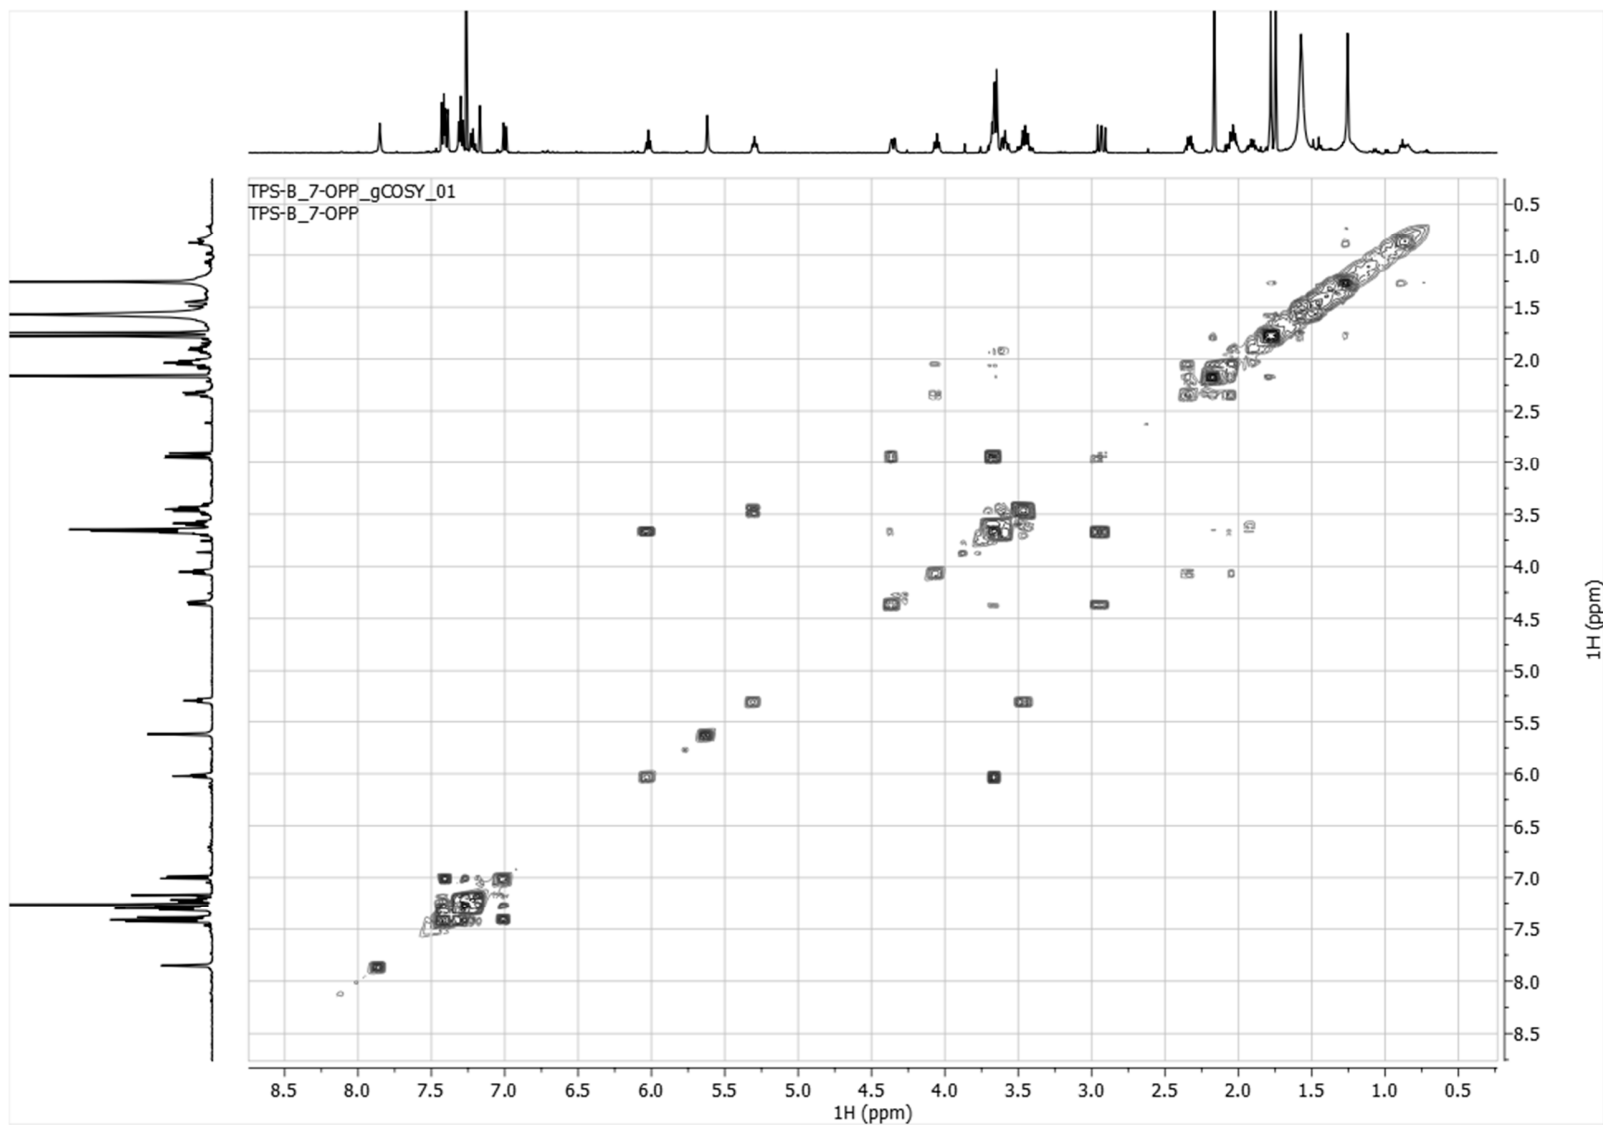

COSY NMR spectrum (500 MHz) of **TPS-25** in  $\text{CDCl}_3$

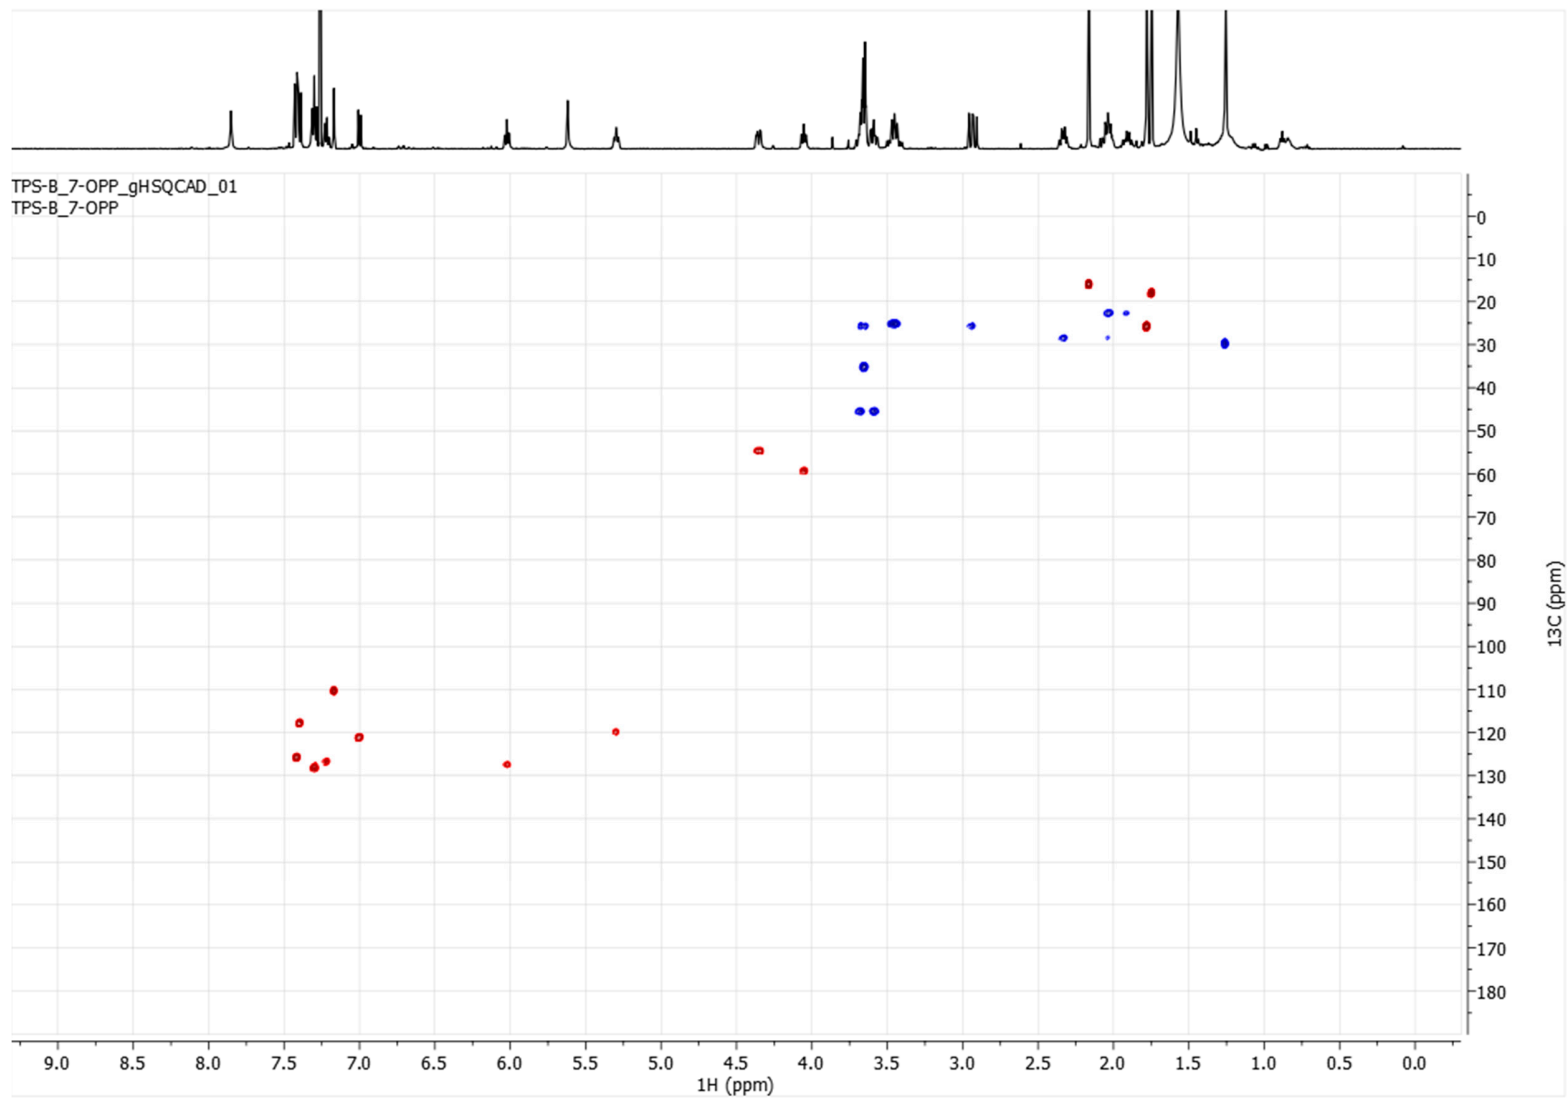

HSQC NMR spectrum (500 MHz) of **TPS-25** in  $\text{CDCl}_3$



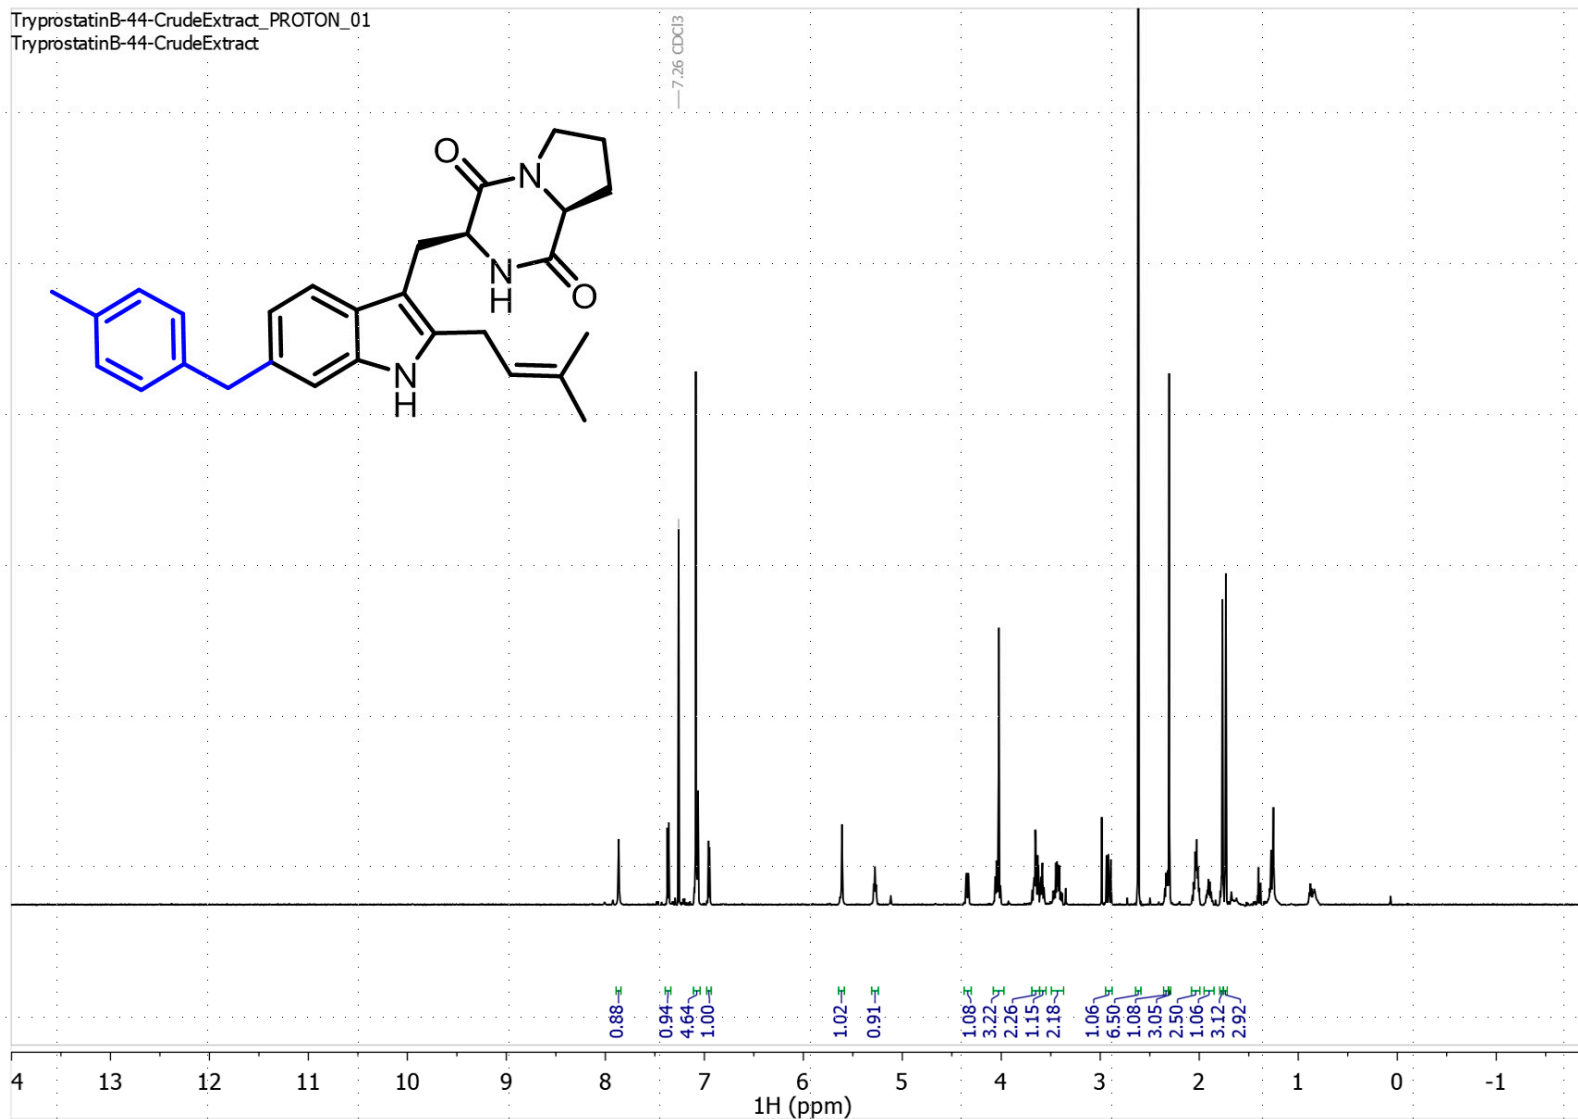

$^1\text{H}$  NMR spectrum (600 MHz) of TPS-46 in  $\text{CDCl}_3$

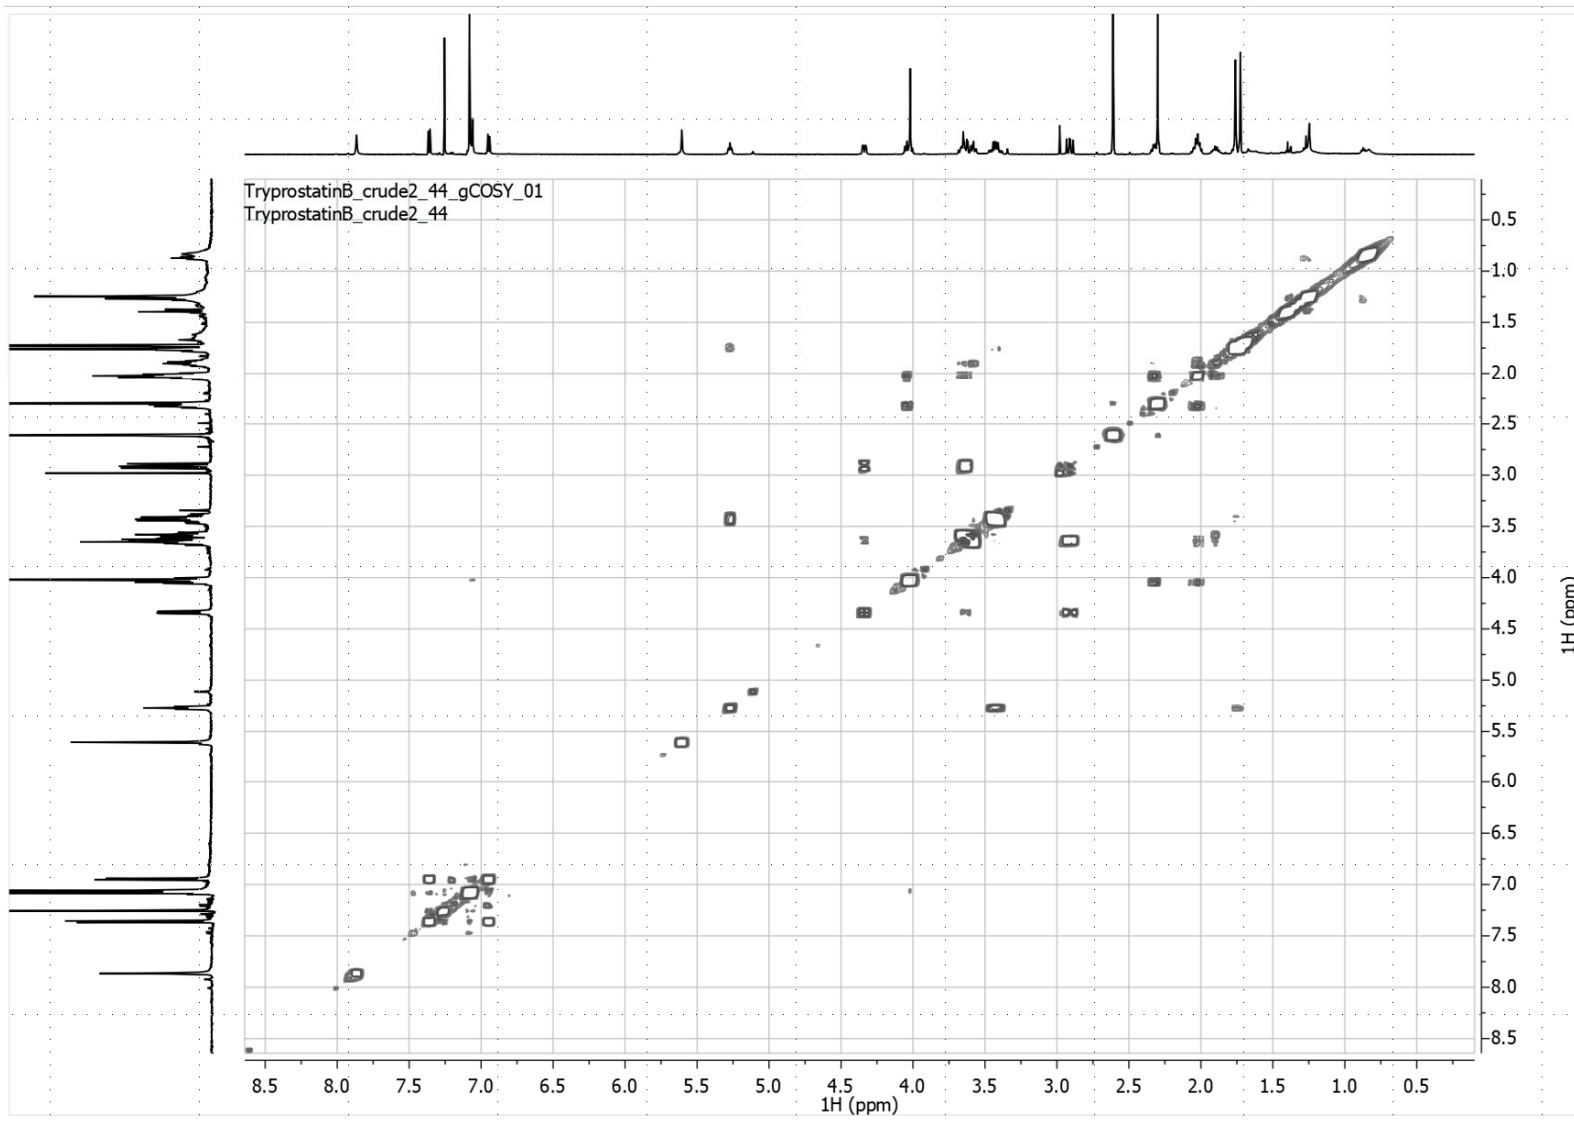

COSY NMR spectrum (600 MHz) of TPS-46 in CDCl<sub>3</sub>

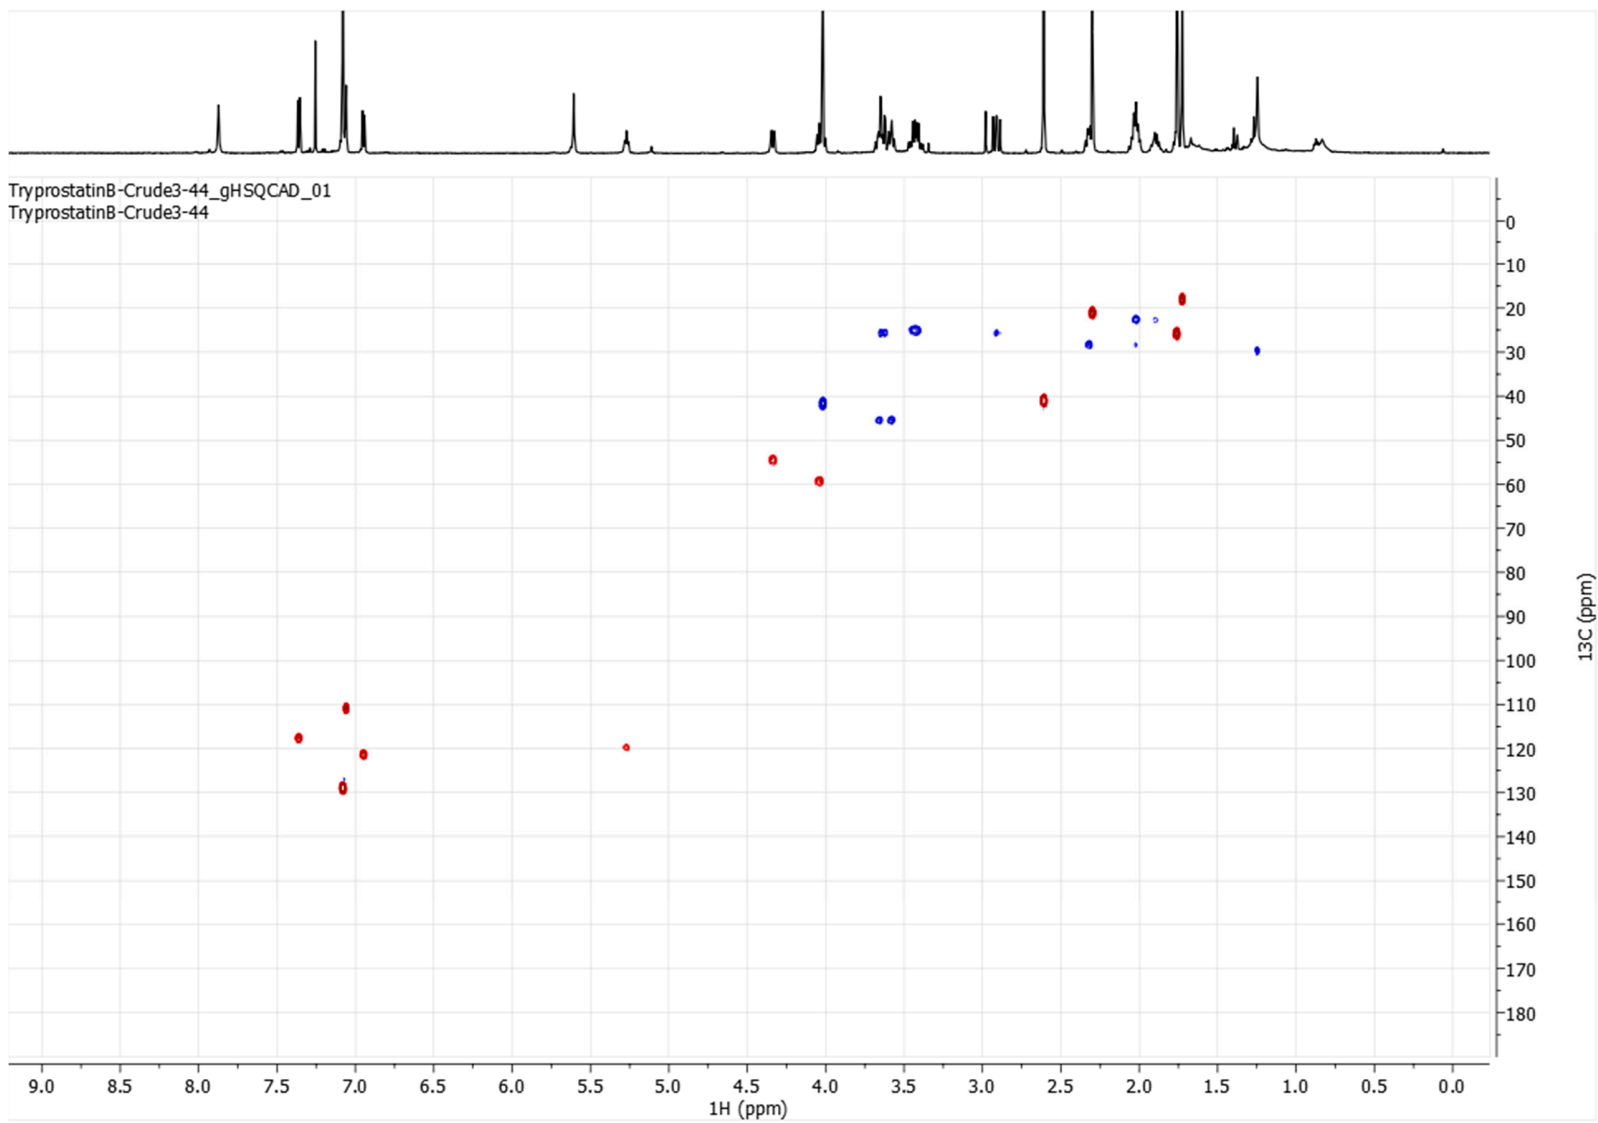

HSQC NMR spectrum (600 MHz) of **TPS-46** in CDCl<sub>3</sub>

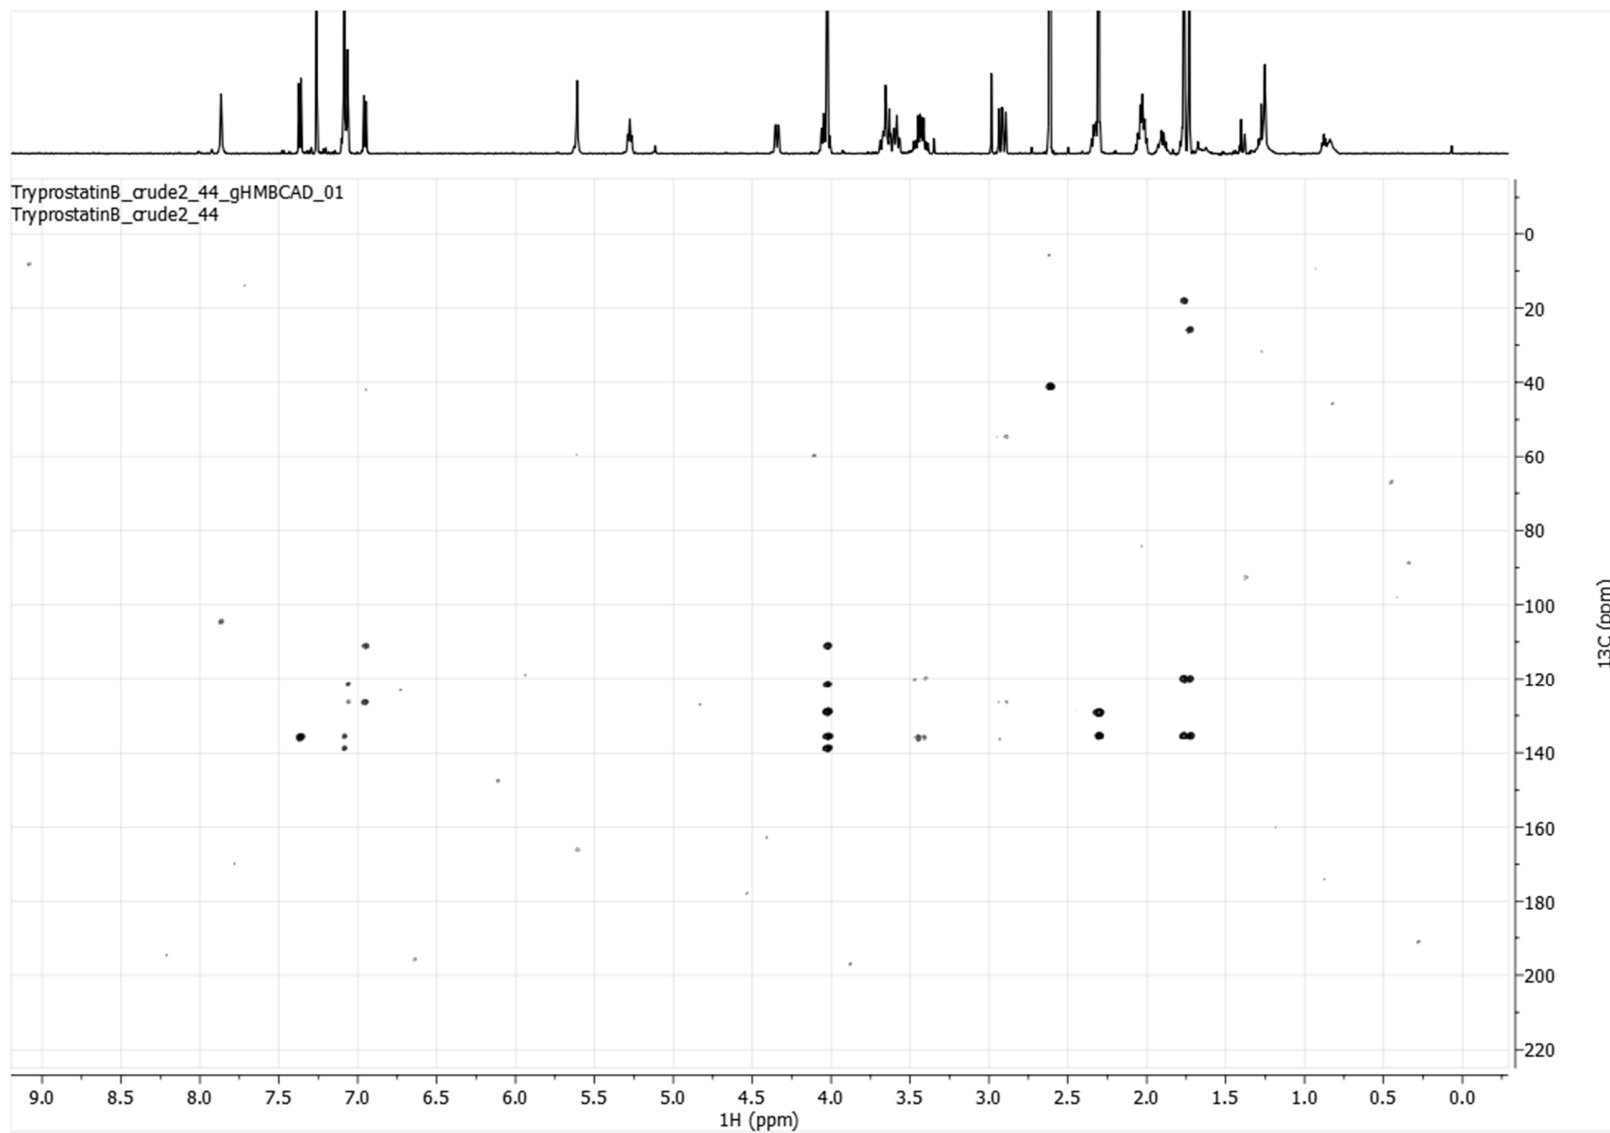

HMBC NMR spectrum (600 MHz) of **TPS-46** in  $\text{CDCl}_3$

EDG\_Tryprostatin\_B\_41-OPP\_HPLC\_Good\_PROTON\_01  
EDG\_Tryprostatin\_B\_41-OPP\_HPLC\_Good

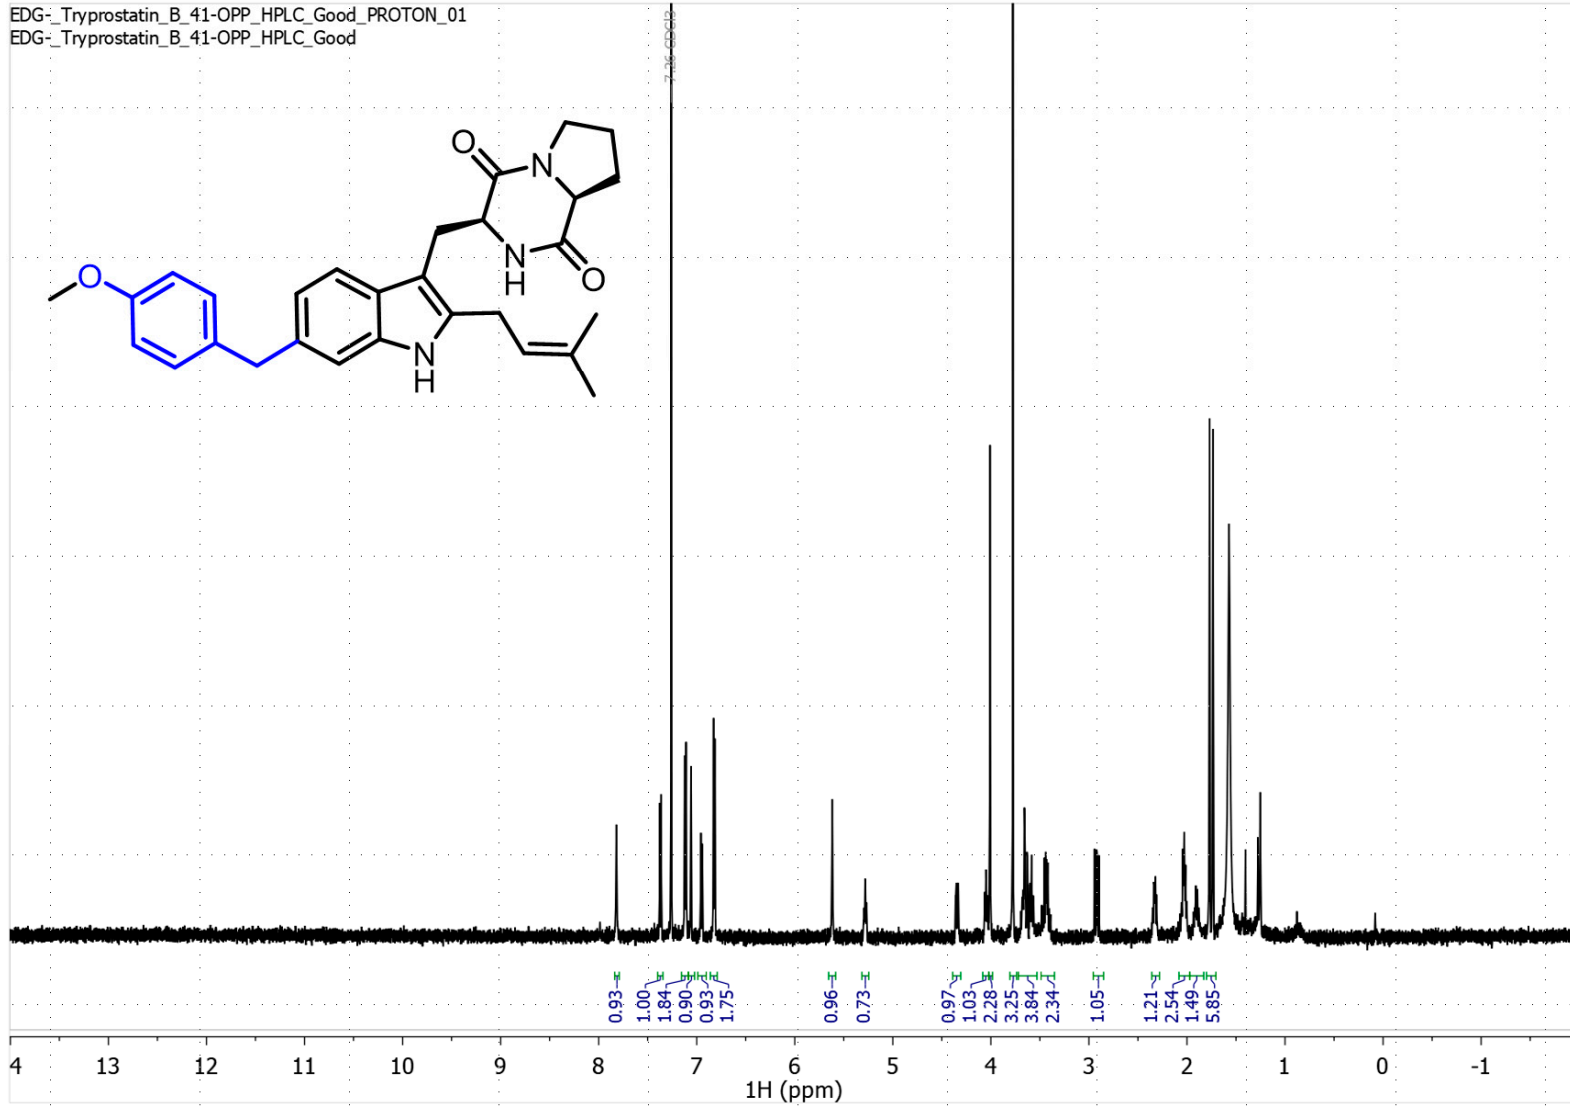

$^1\text{H}$  NMR spectrum (600 MHz) of TPS-52 in  $\text{CDCl}_3$

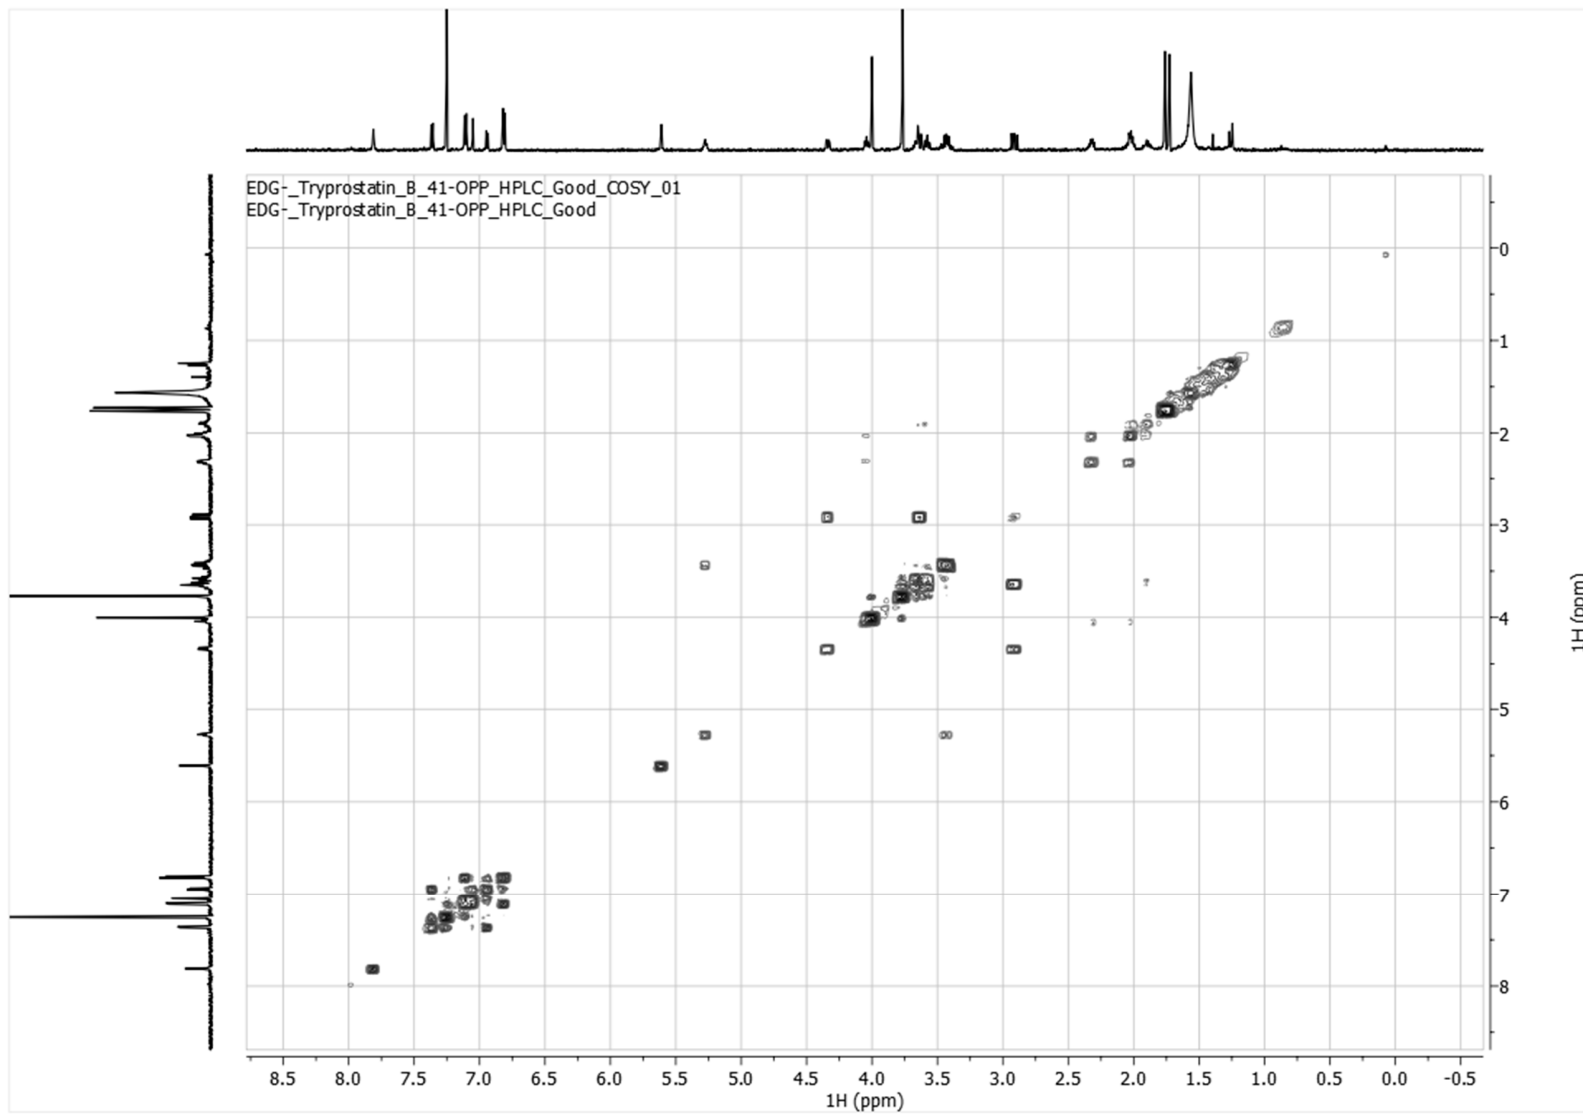

COSY NMR spectrum (600 MHz) of TPS-52 in CDCl<sub>3</sub>

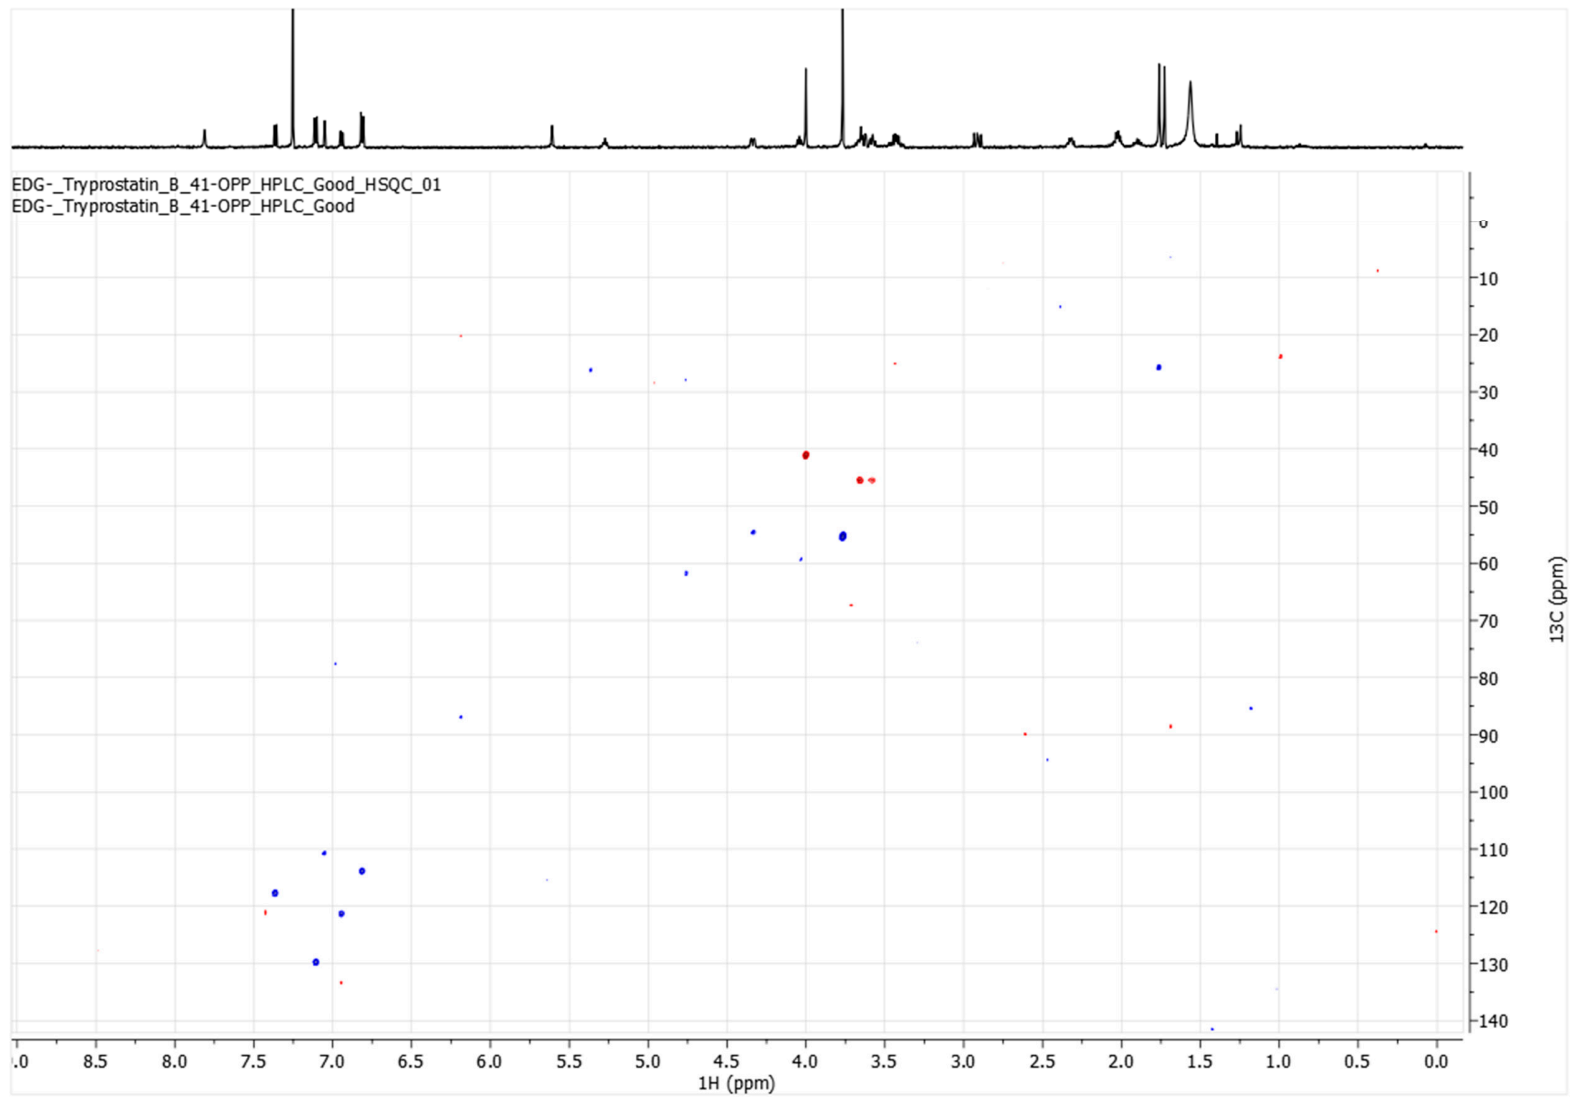

HSQC NMR spectrum (600 MHz) of **TPS-52** in CDCl<sub>3</sub>

TryprostatinB-EDG46-CrudeExtract\_PROTON\_01  
TryprostatinB-EDG46-CrudeExtract

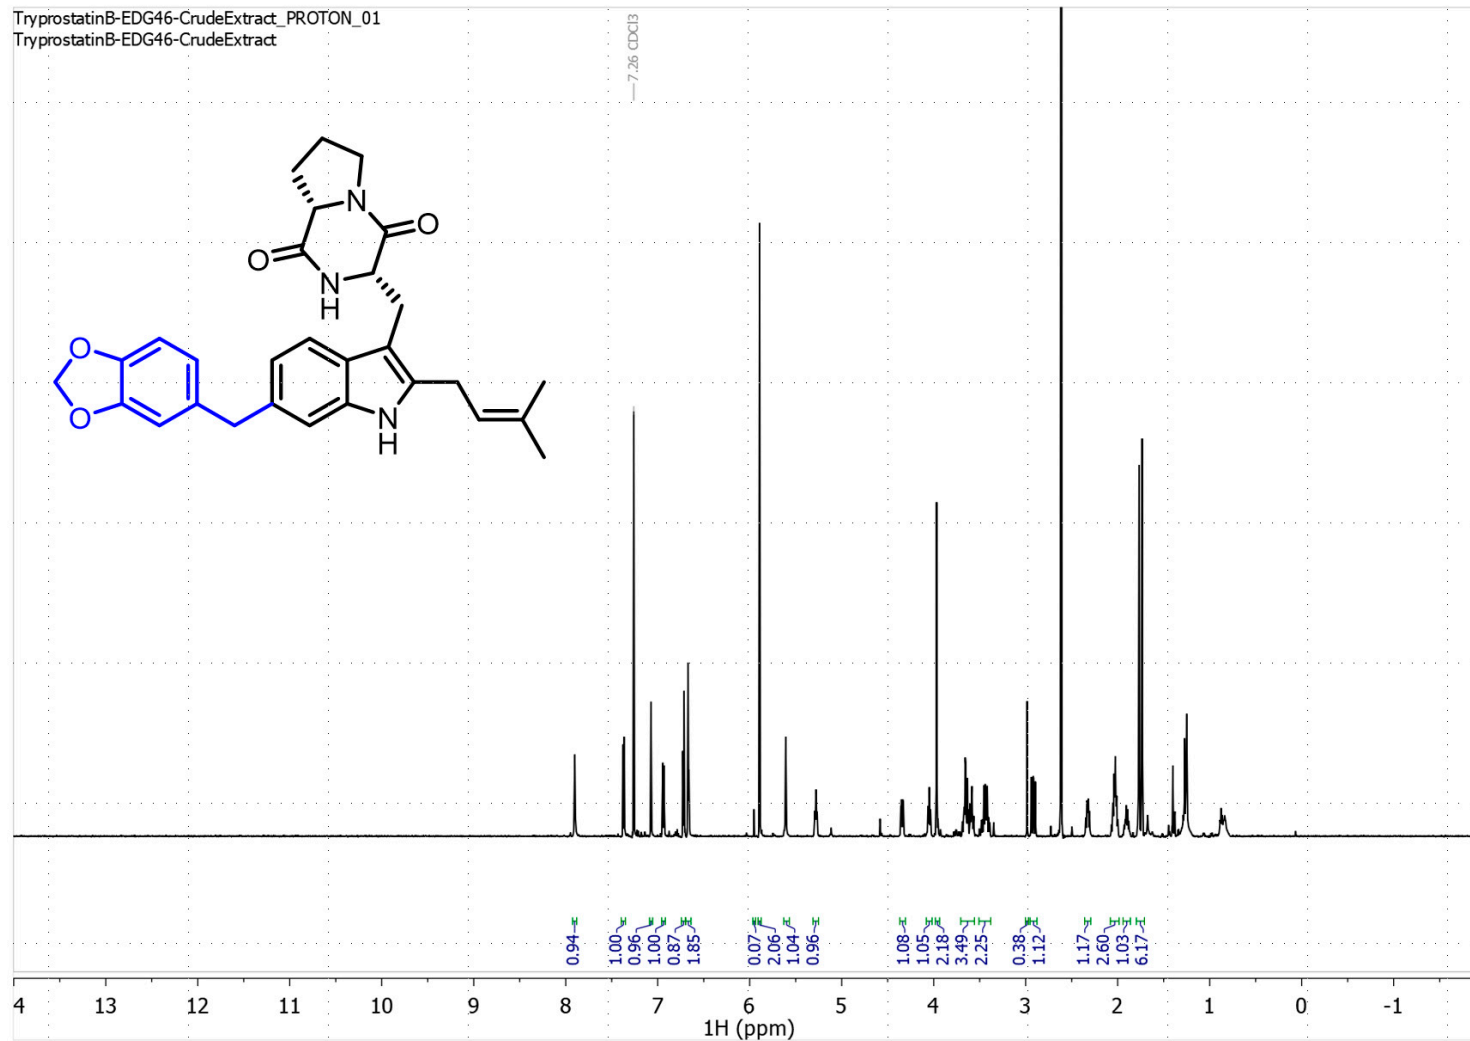

$^1\text{H}$  NMR Spectrum (600 MHz) of TPS-58 in  $\text{CDCl}_3$



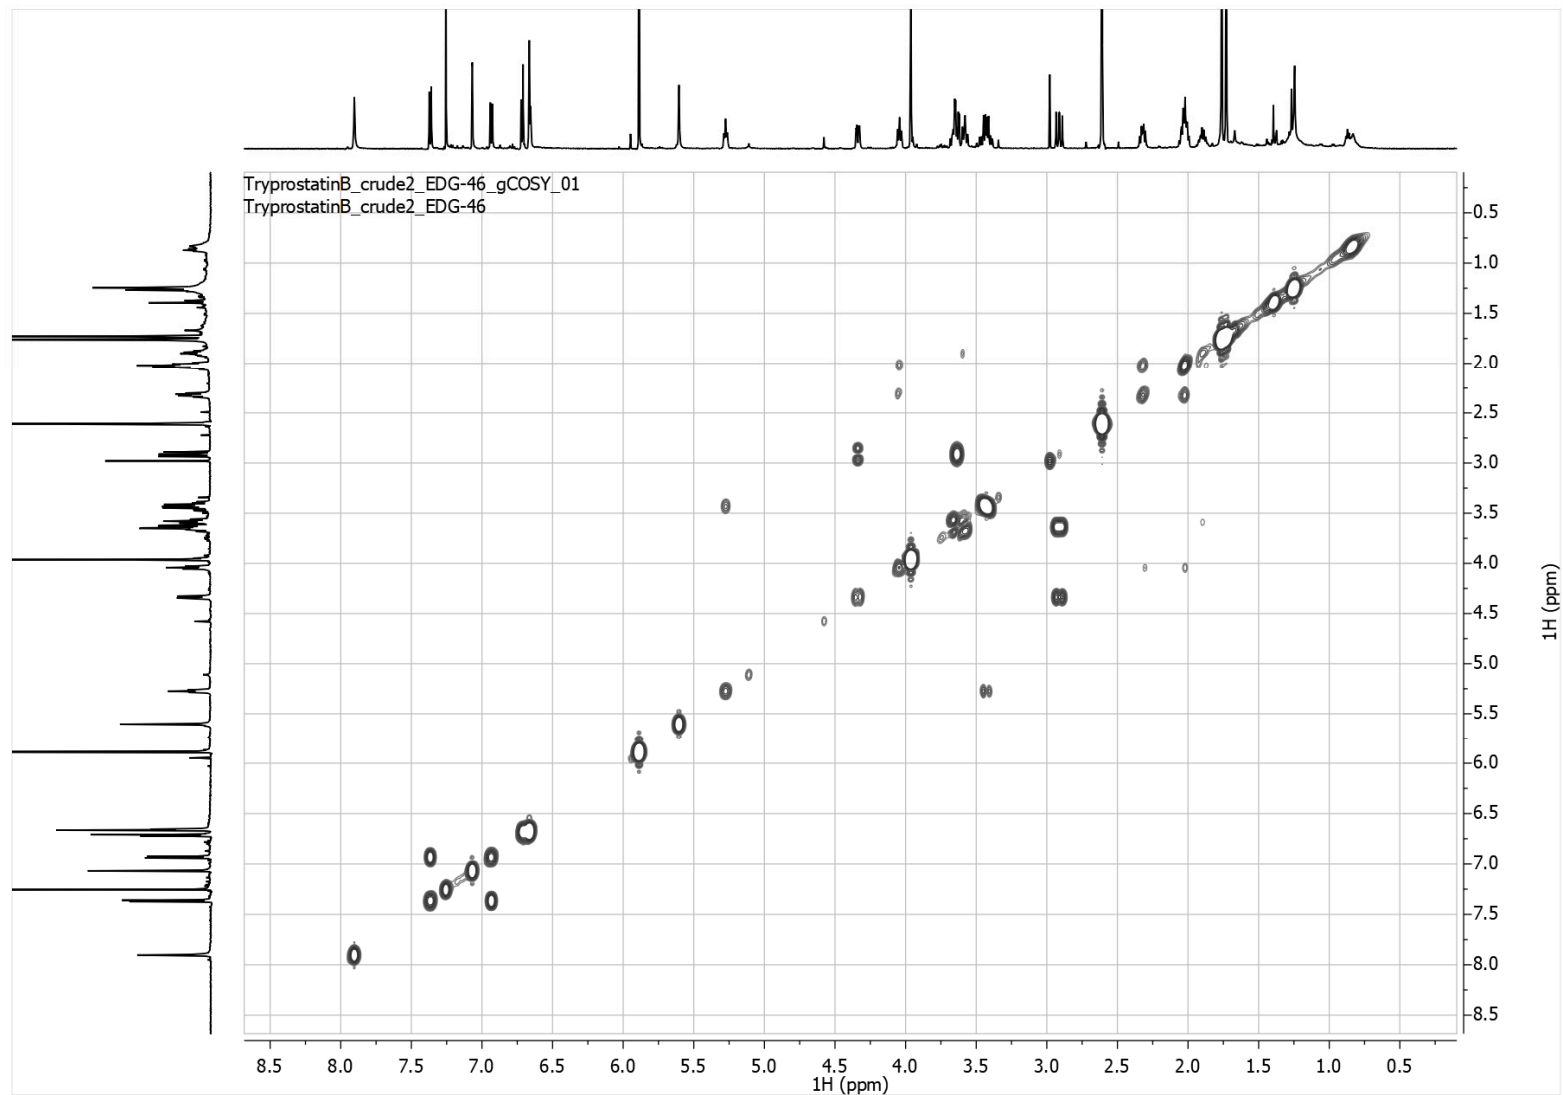

COSY NMR spectrum (600 MHz) of TPS-58 in CDCl<sub>3</sub>

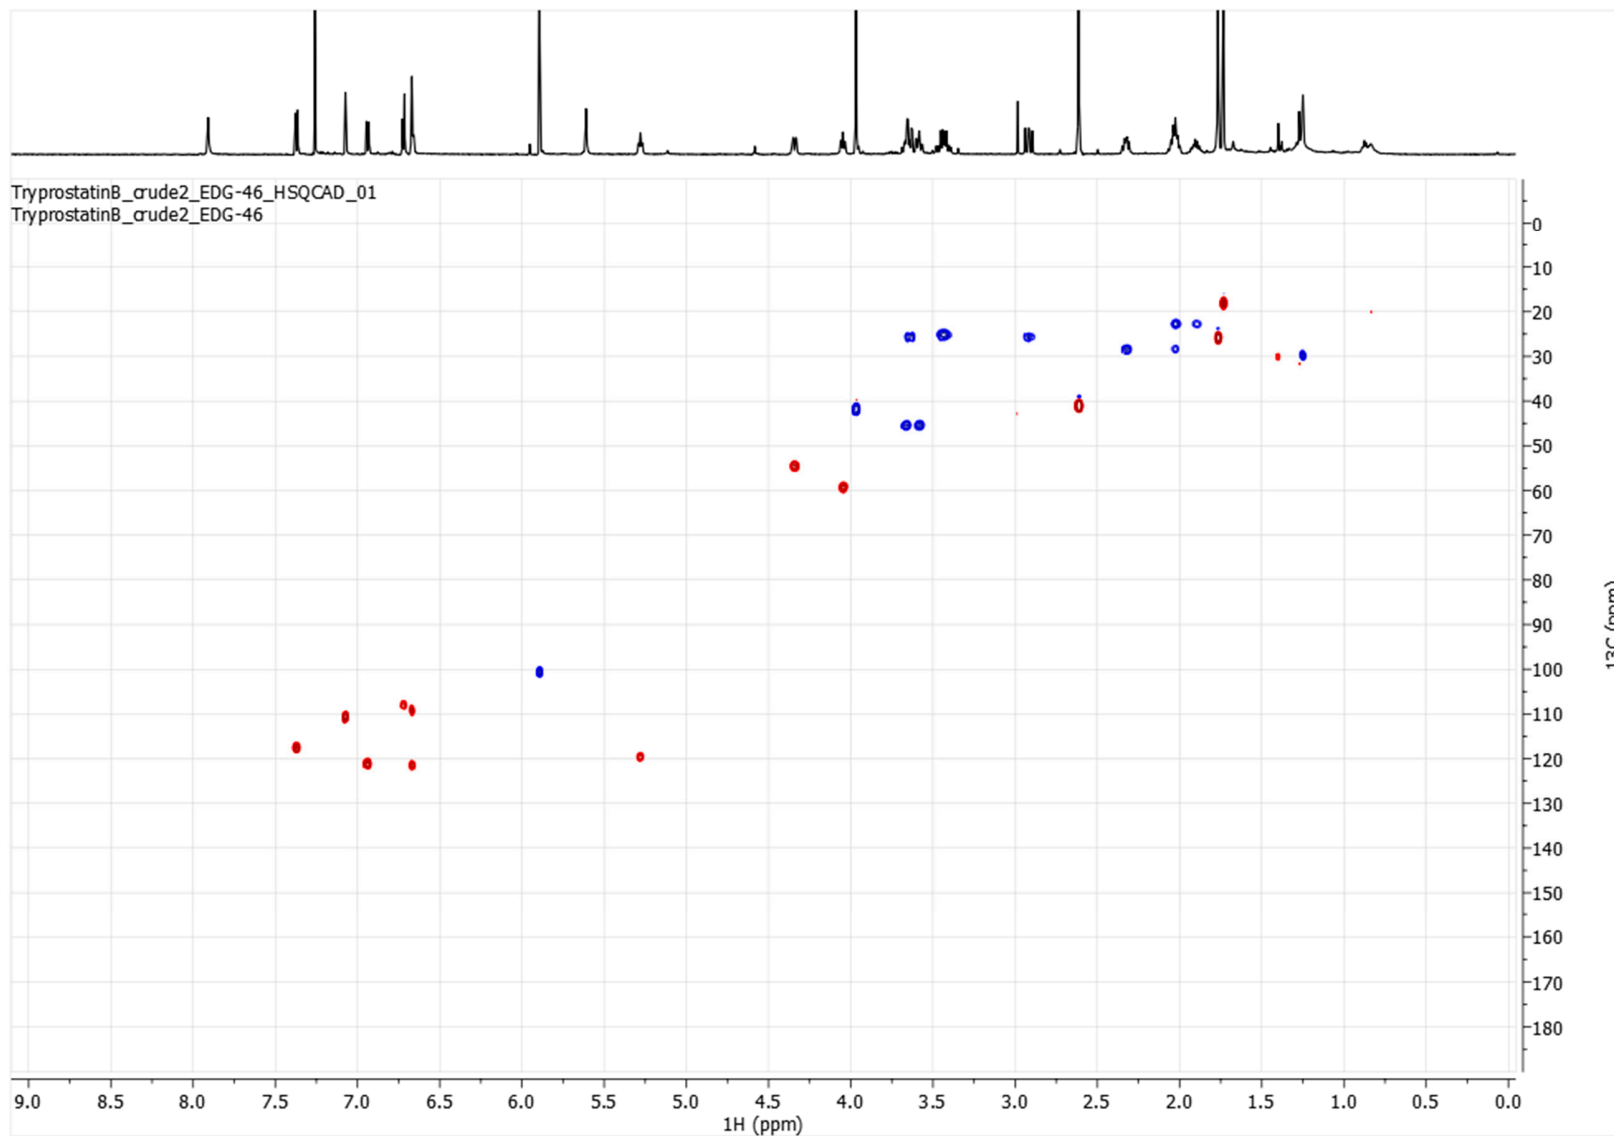

HSQC NMR spectrum (600 MHz) of **TPS-58** in  $\text{CDCl}_3$

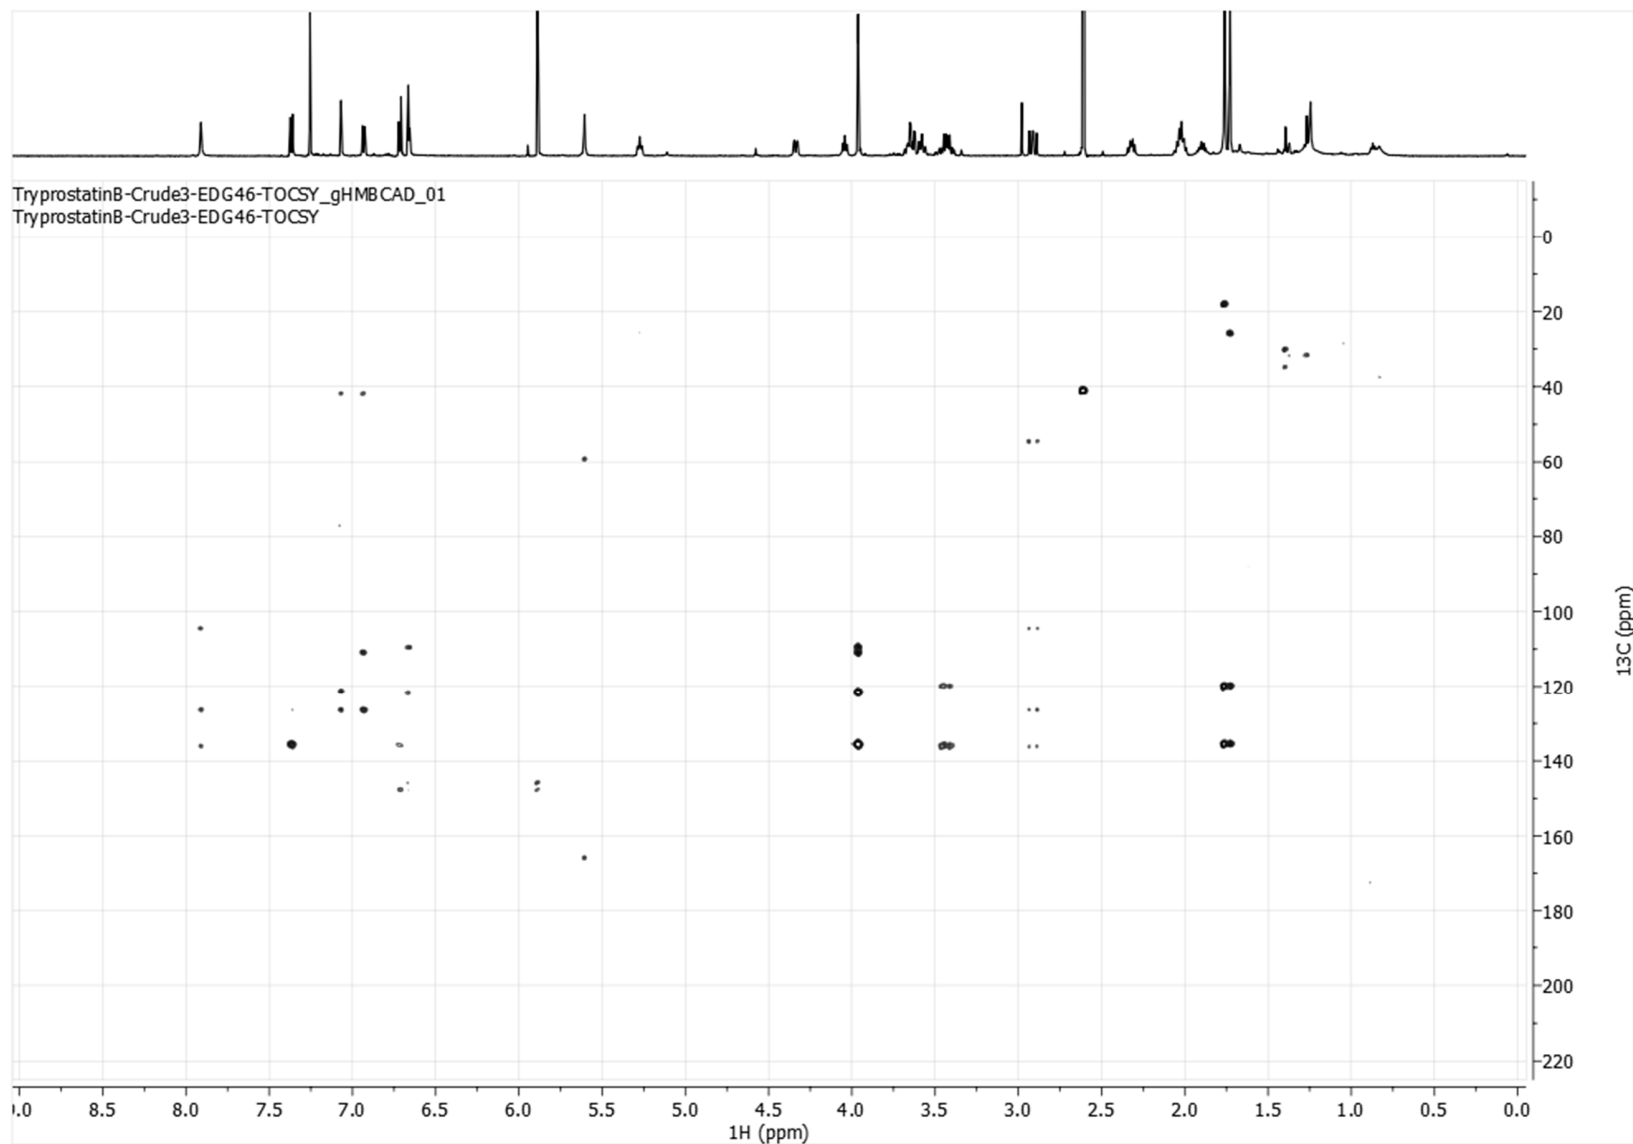

HMBC NMR spectrum (600 MHz) of **TPS-58** in  $\text{CDCl}_3$

TPS-B-70-Peak1\_HPLC\_PROTON\_02  
TPS-B-70-Peak1\_HPLC

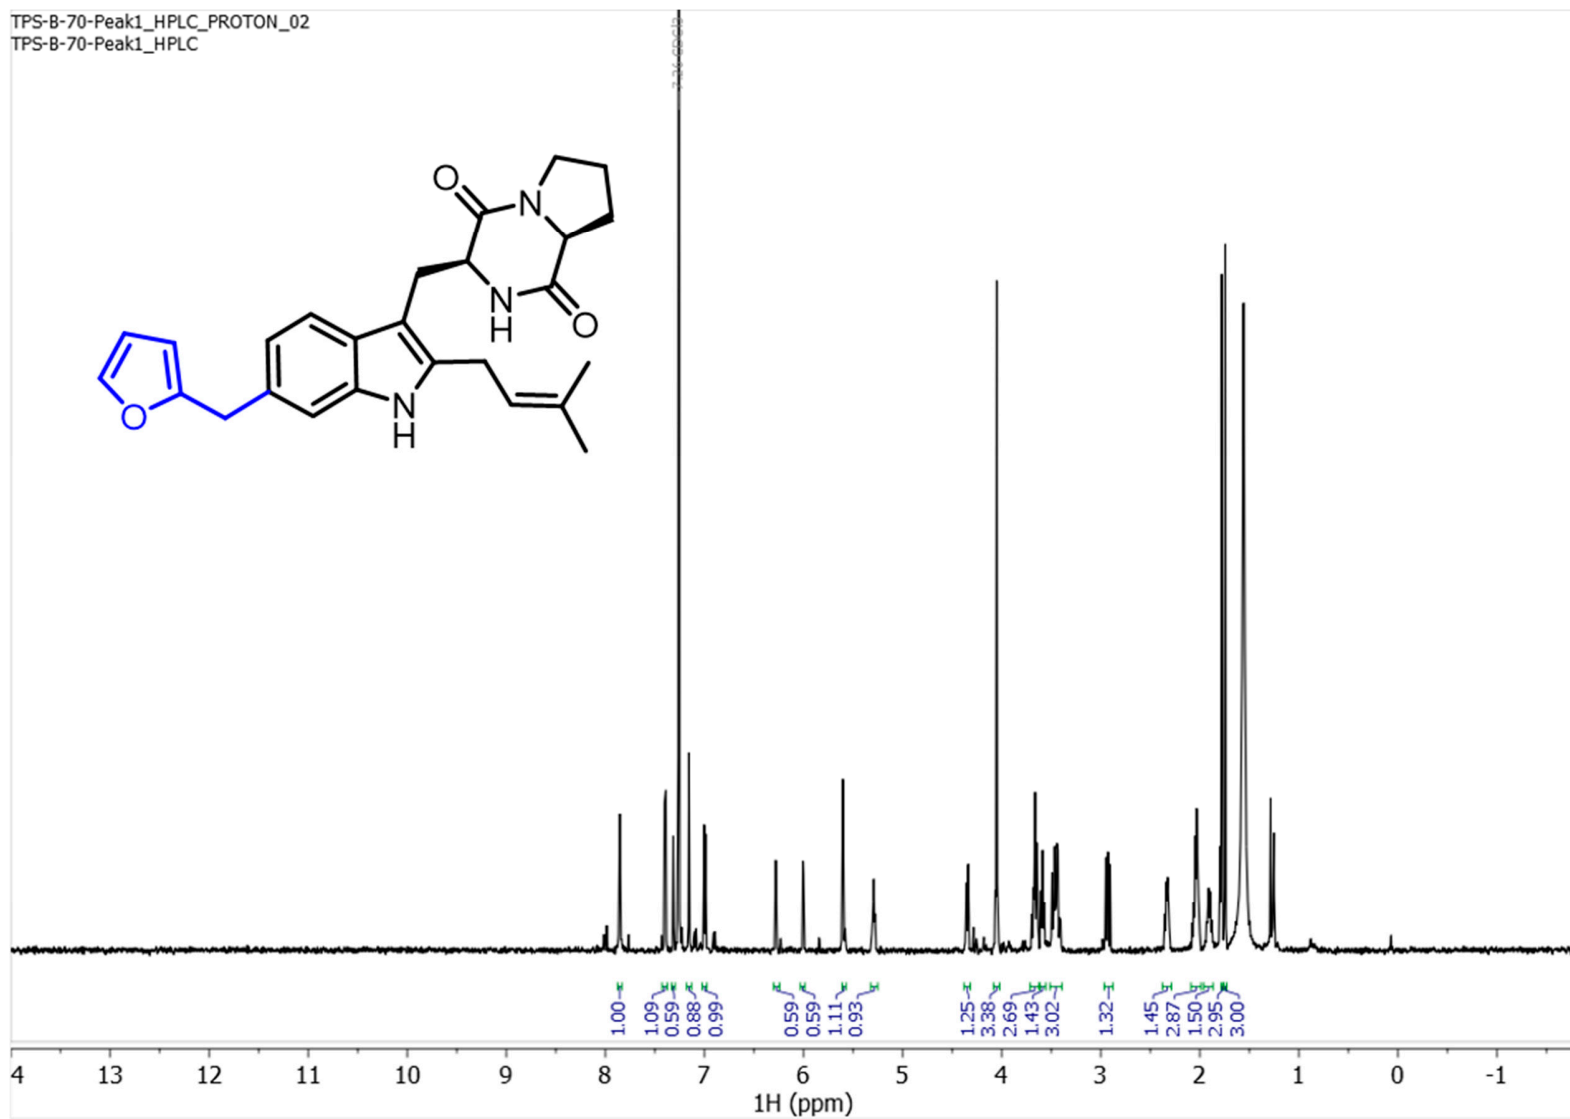

<sup>1</sup>H NMR spectrum (500 MHz) of **TPS-61** in CDCl<sub>3</sub>

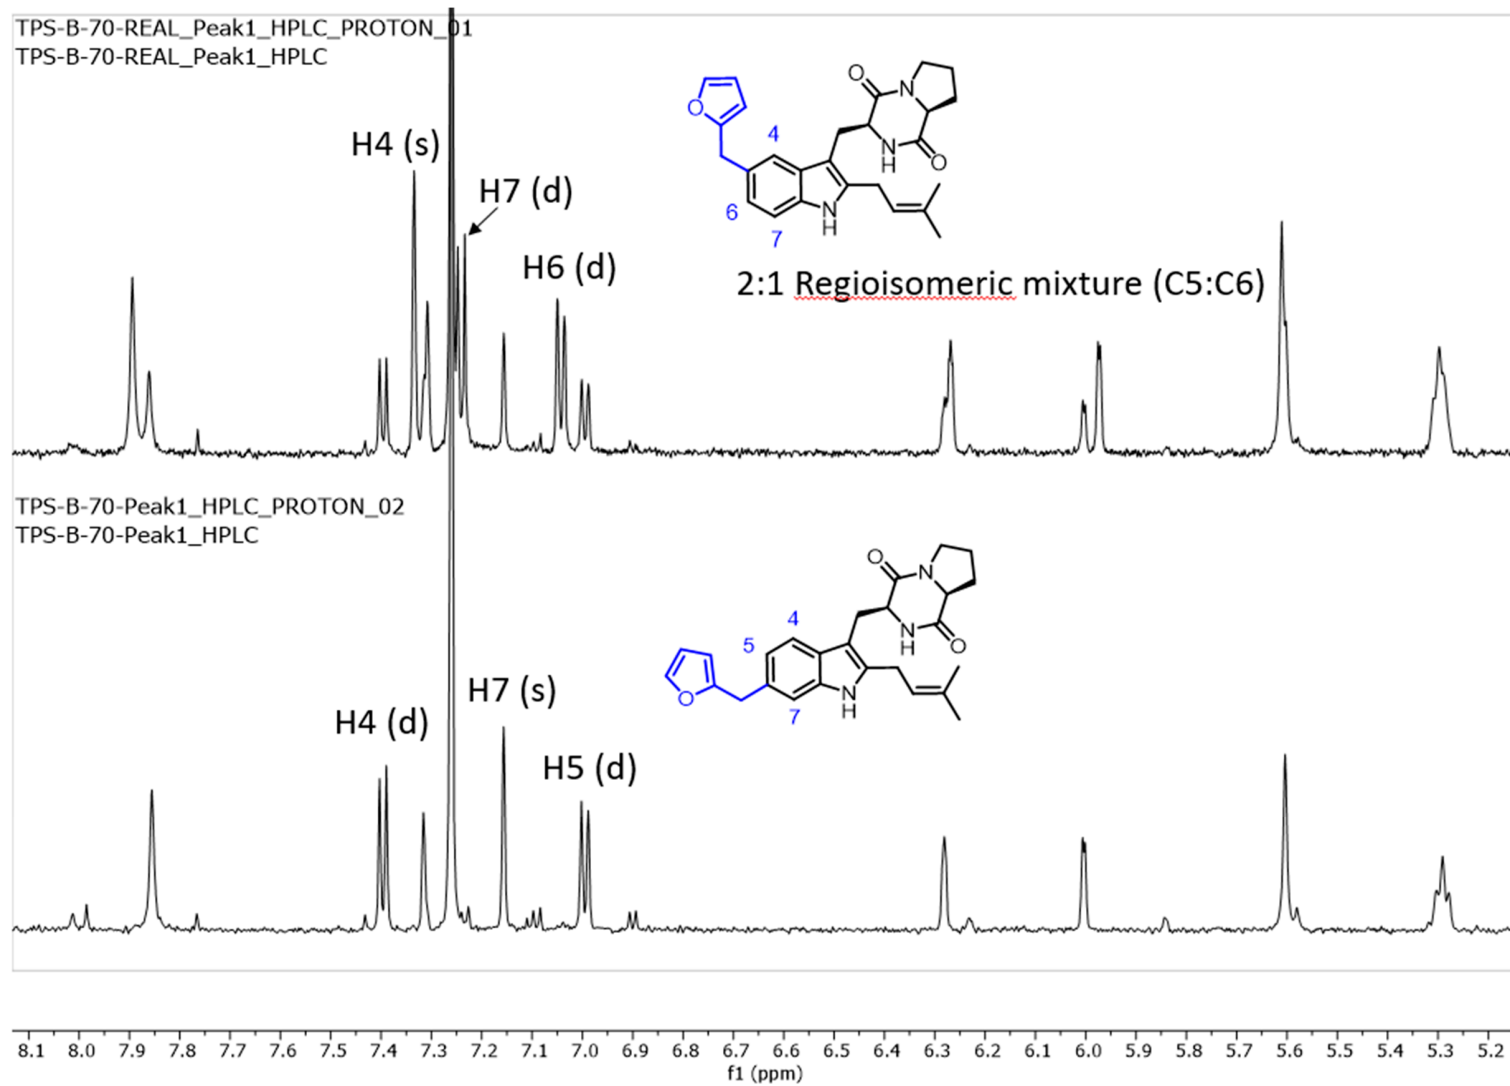

Stacked  $^1\text{H}$  spectra of **TPS-61** fractions after partial purification. The top spectrum displays the H7 doublet and H4 singlet indicative of C-5 alkylation as a minor reaction product. The bottom spectrum is the purified C6 alkylated major product.

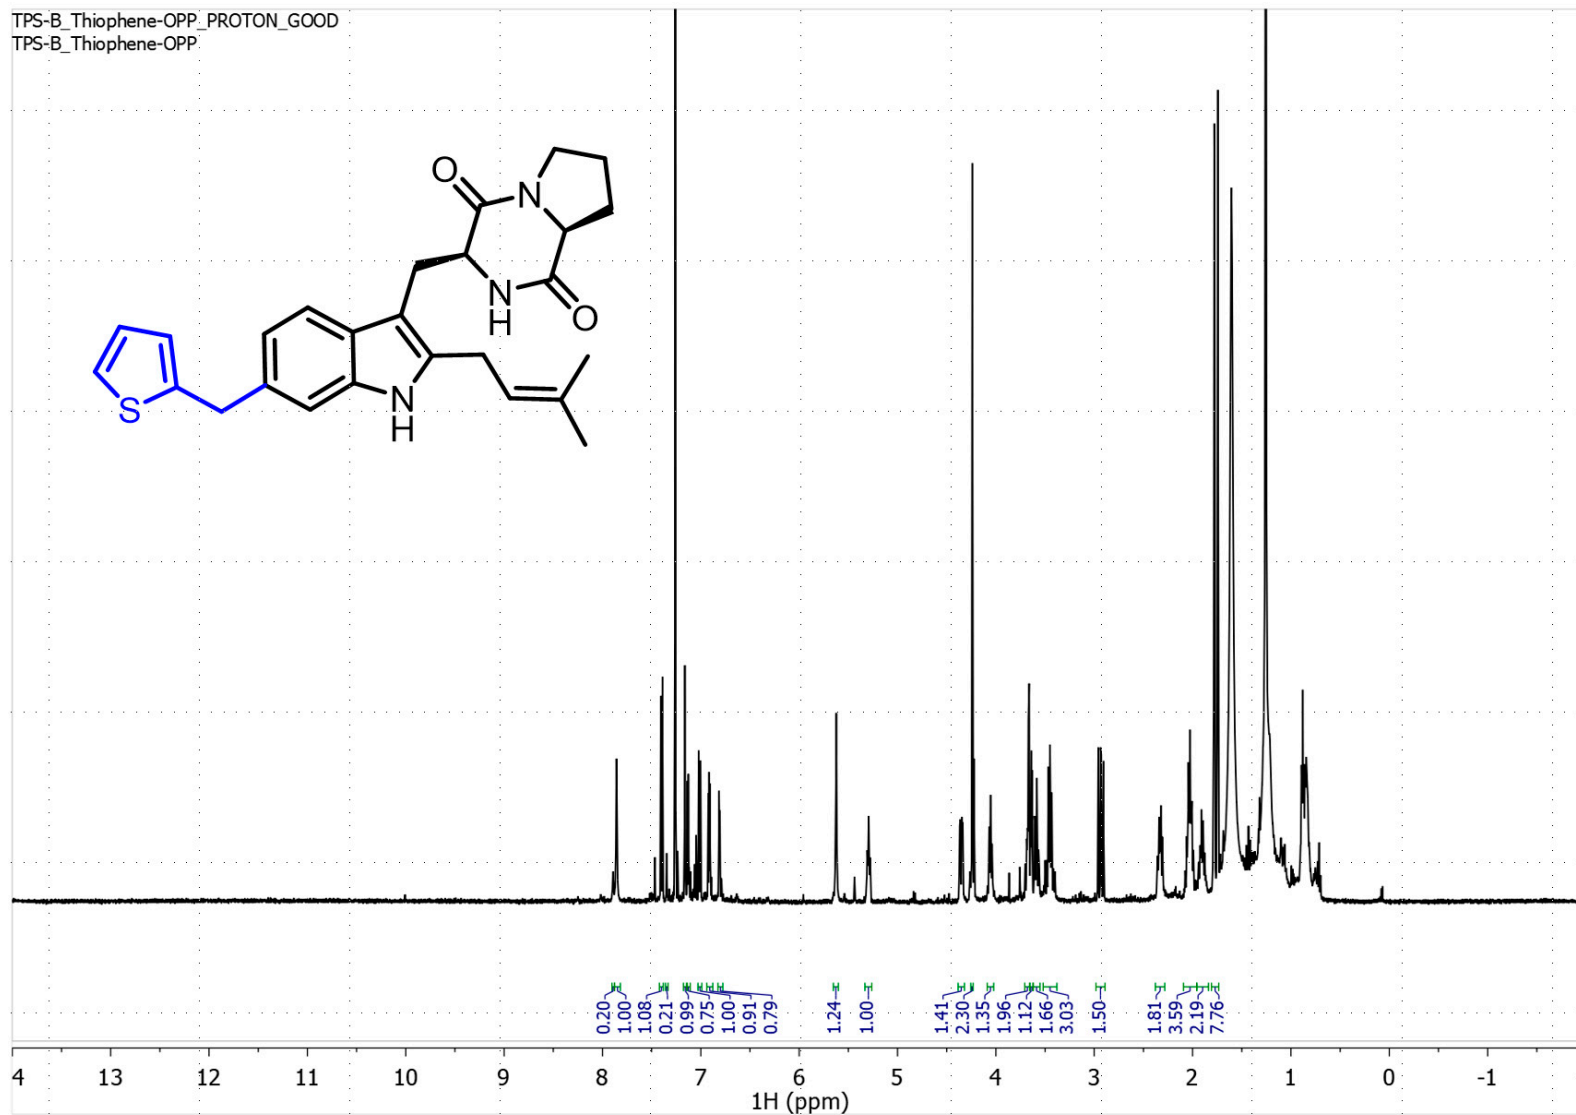

$^1\text{H}$  NMR spectrum (500 MHz) of TPS-62 in  $\text{CDCl}_3$ . The minor C5 alkylated product is 20% of the products based on integrations.

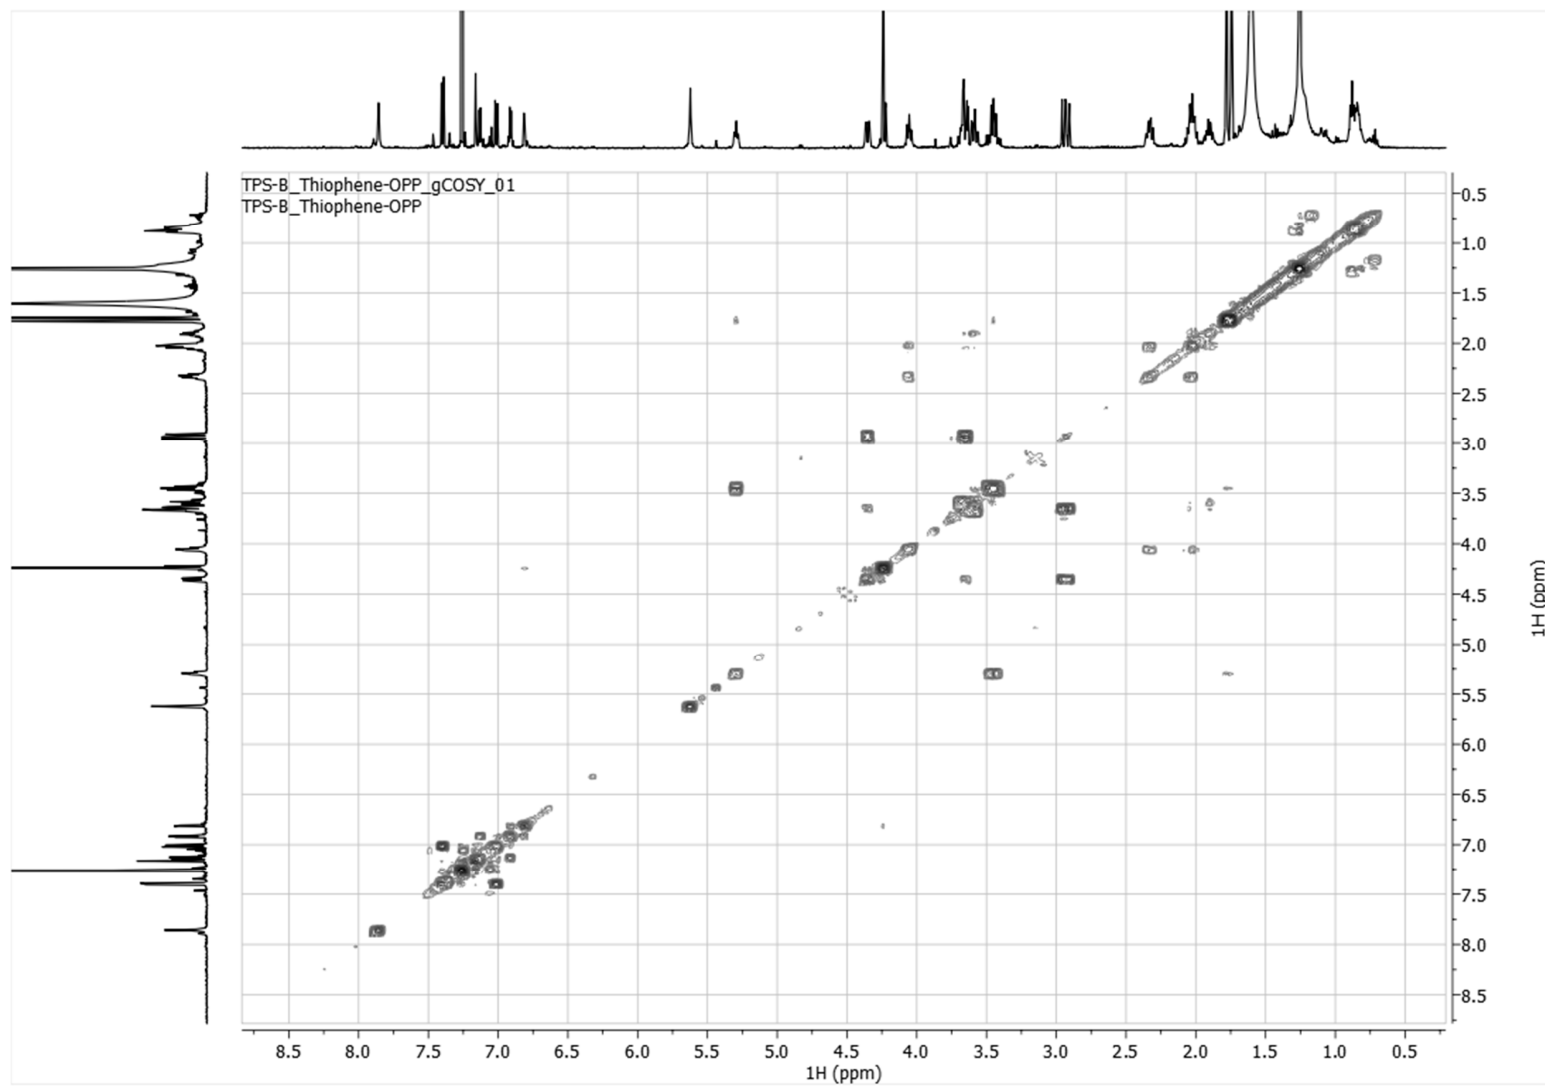

COSY NMR spectrum (500 MHz) of **TPS-62** in  $\text{CDCl}_3$

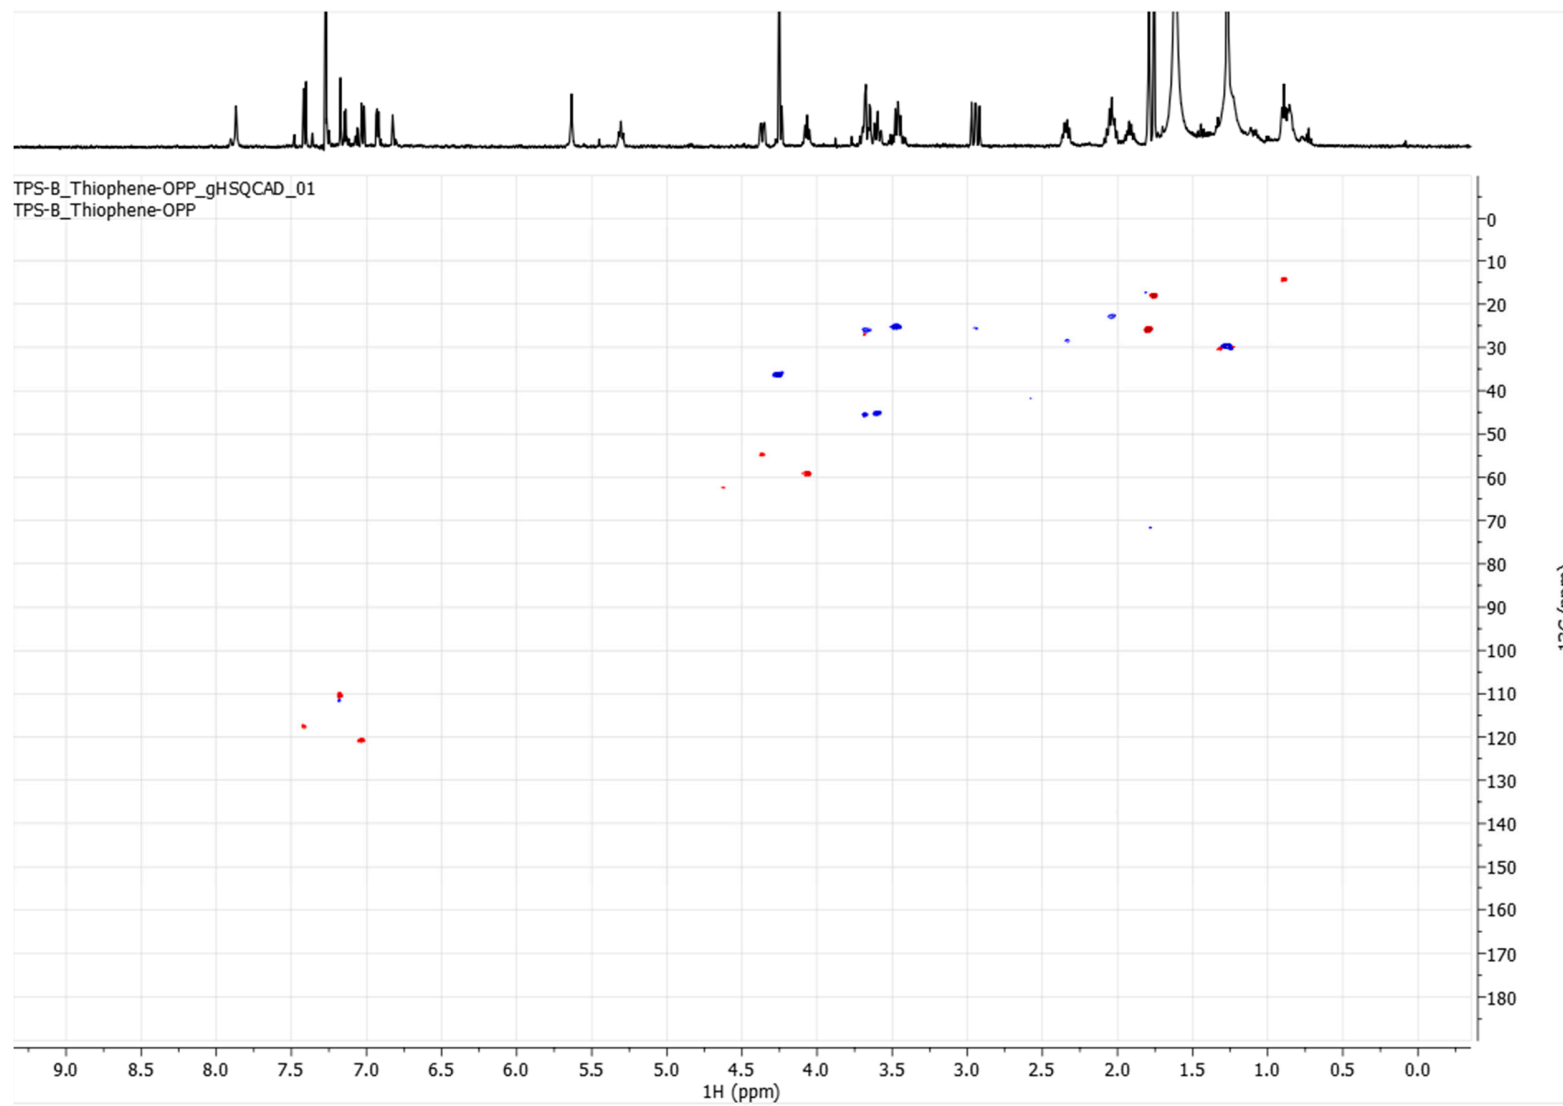

HSQC NMR spectrum (500 MHz) of **TPS-62** in  $\text{CDCl}_3$





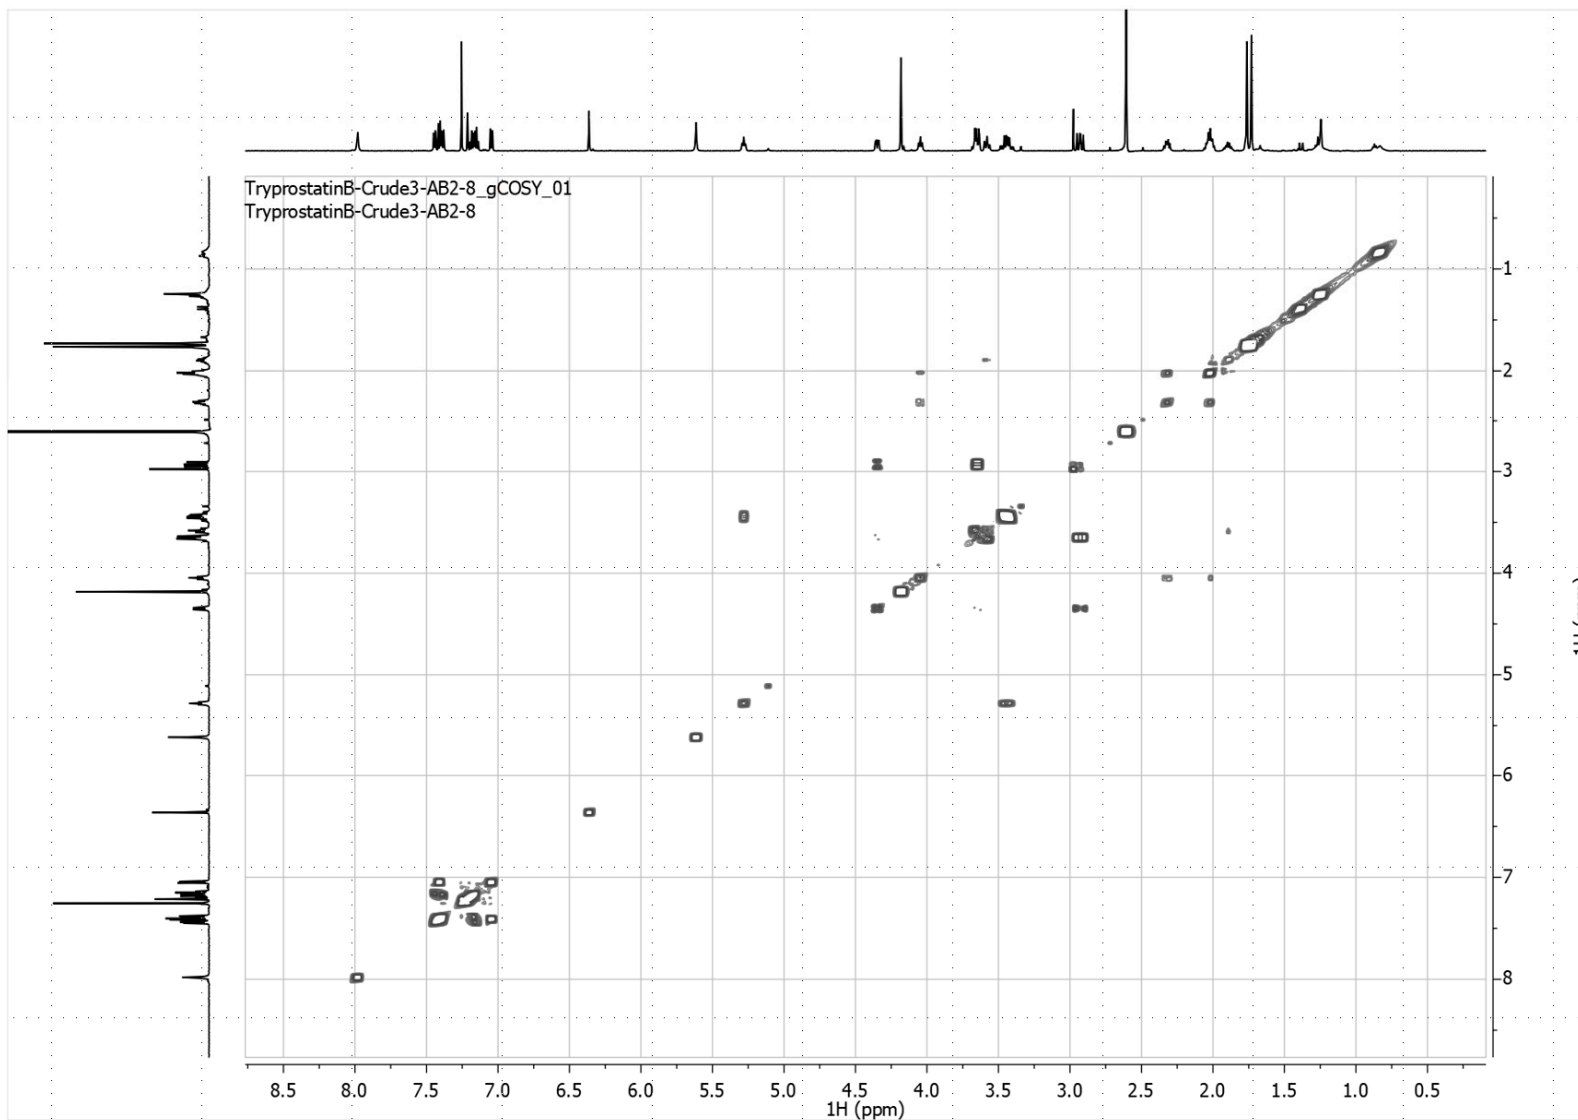

COSY NMR spectrum (600 MHz) of TPS-65 in CDCl<sub>3</sub>

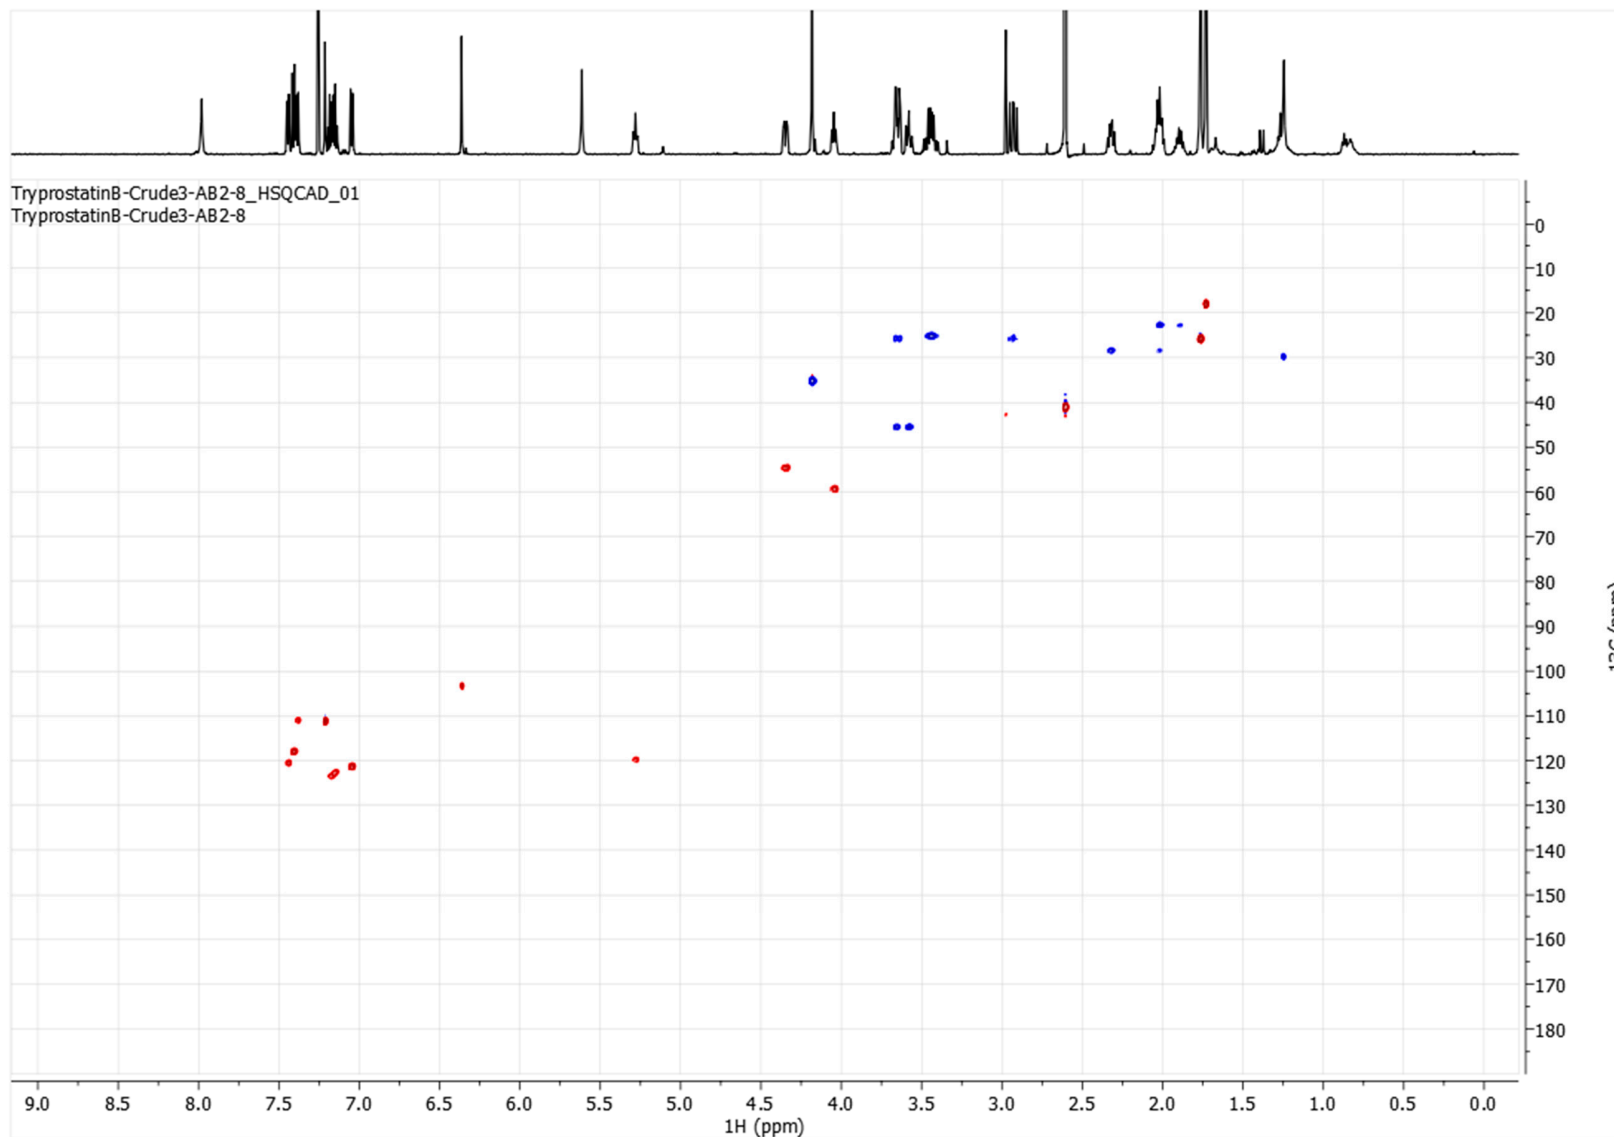

HSQC NMR spectrum (600 MHz) of **TPS-65** in CDCl<sub>3</sub>

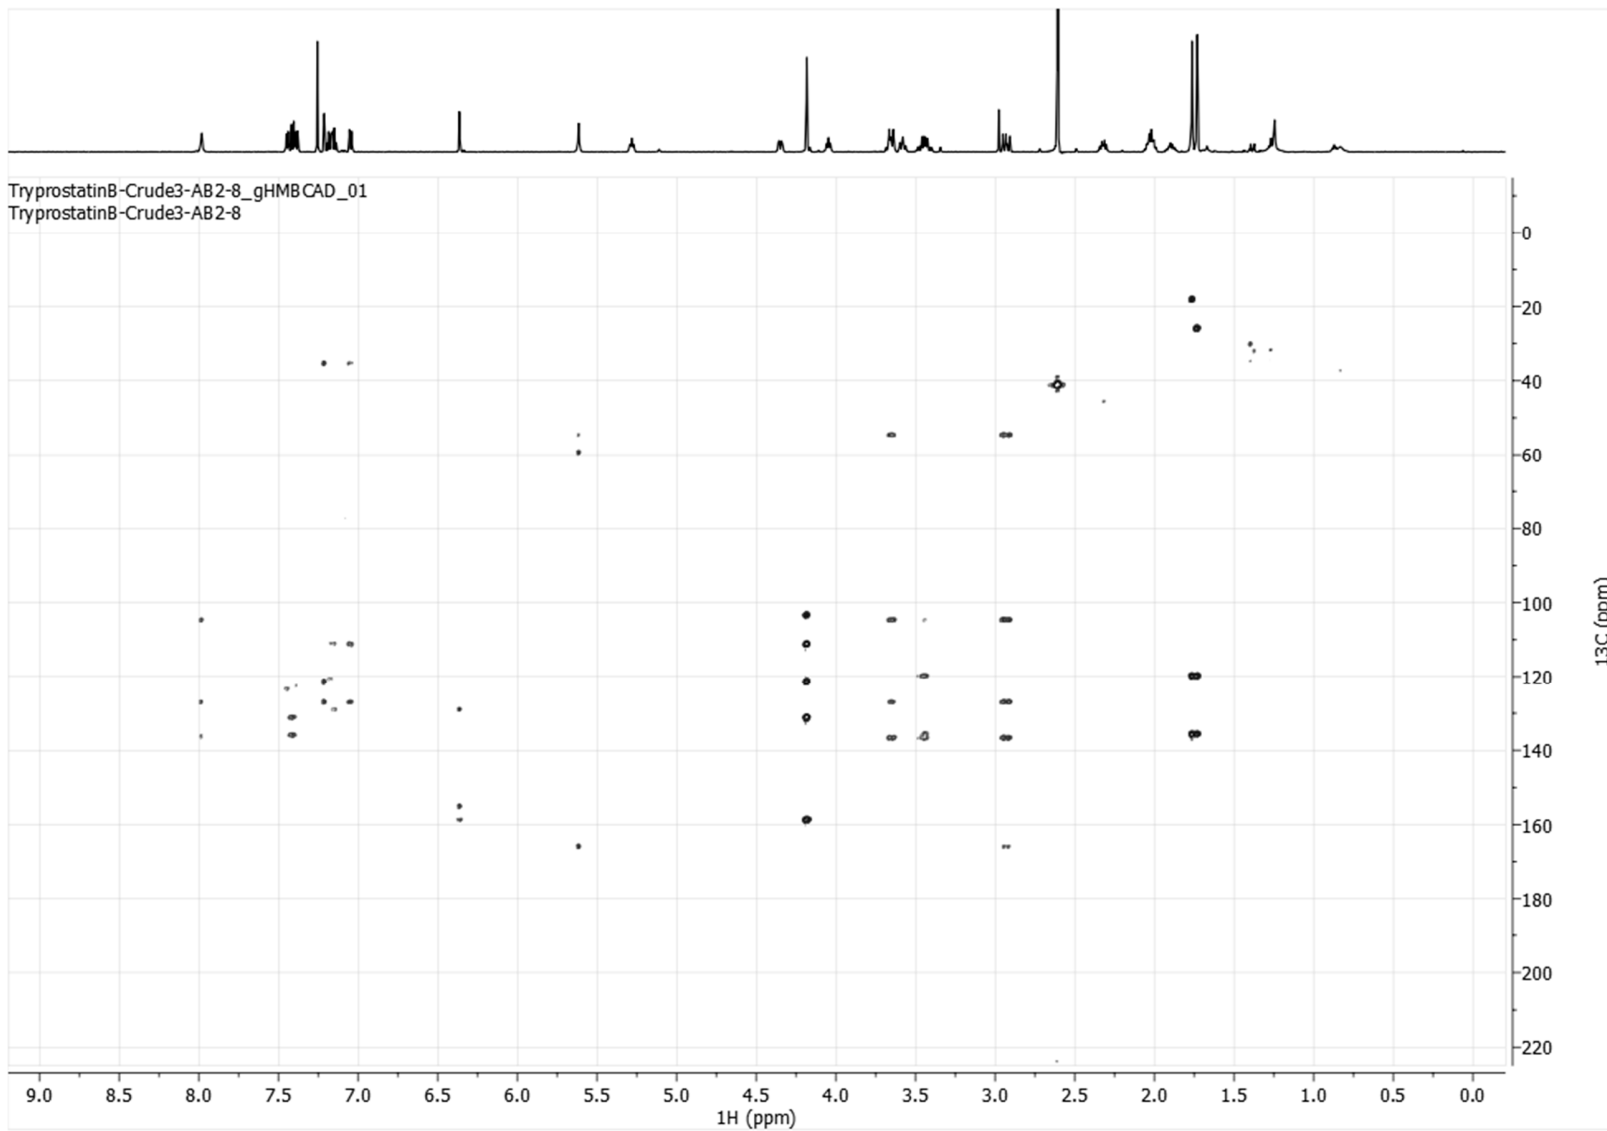

HMBC NMR spectrum (600 MHz) of **TPS-65** in CDCl<sub>3</sub>

TPS-A  
Gardner  
12923SS-N-002 27 (1.032) AM (Cen,4, 80.00, Ar,10000.0,0.00,0.00)

SYNAPT-G2-Si#UGA589

22-Aug-2019 13:10:16

1: TOF MS ES+  
2.13e6

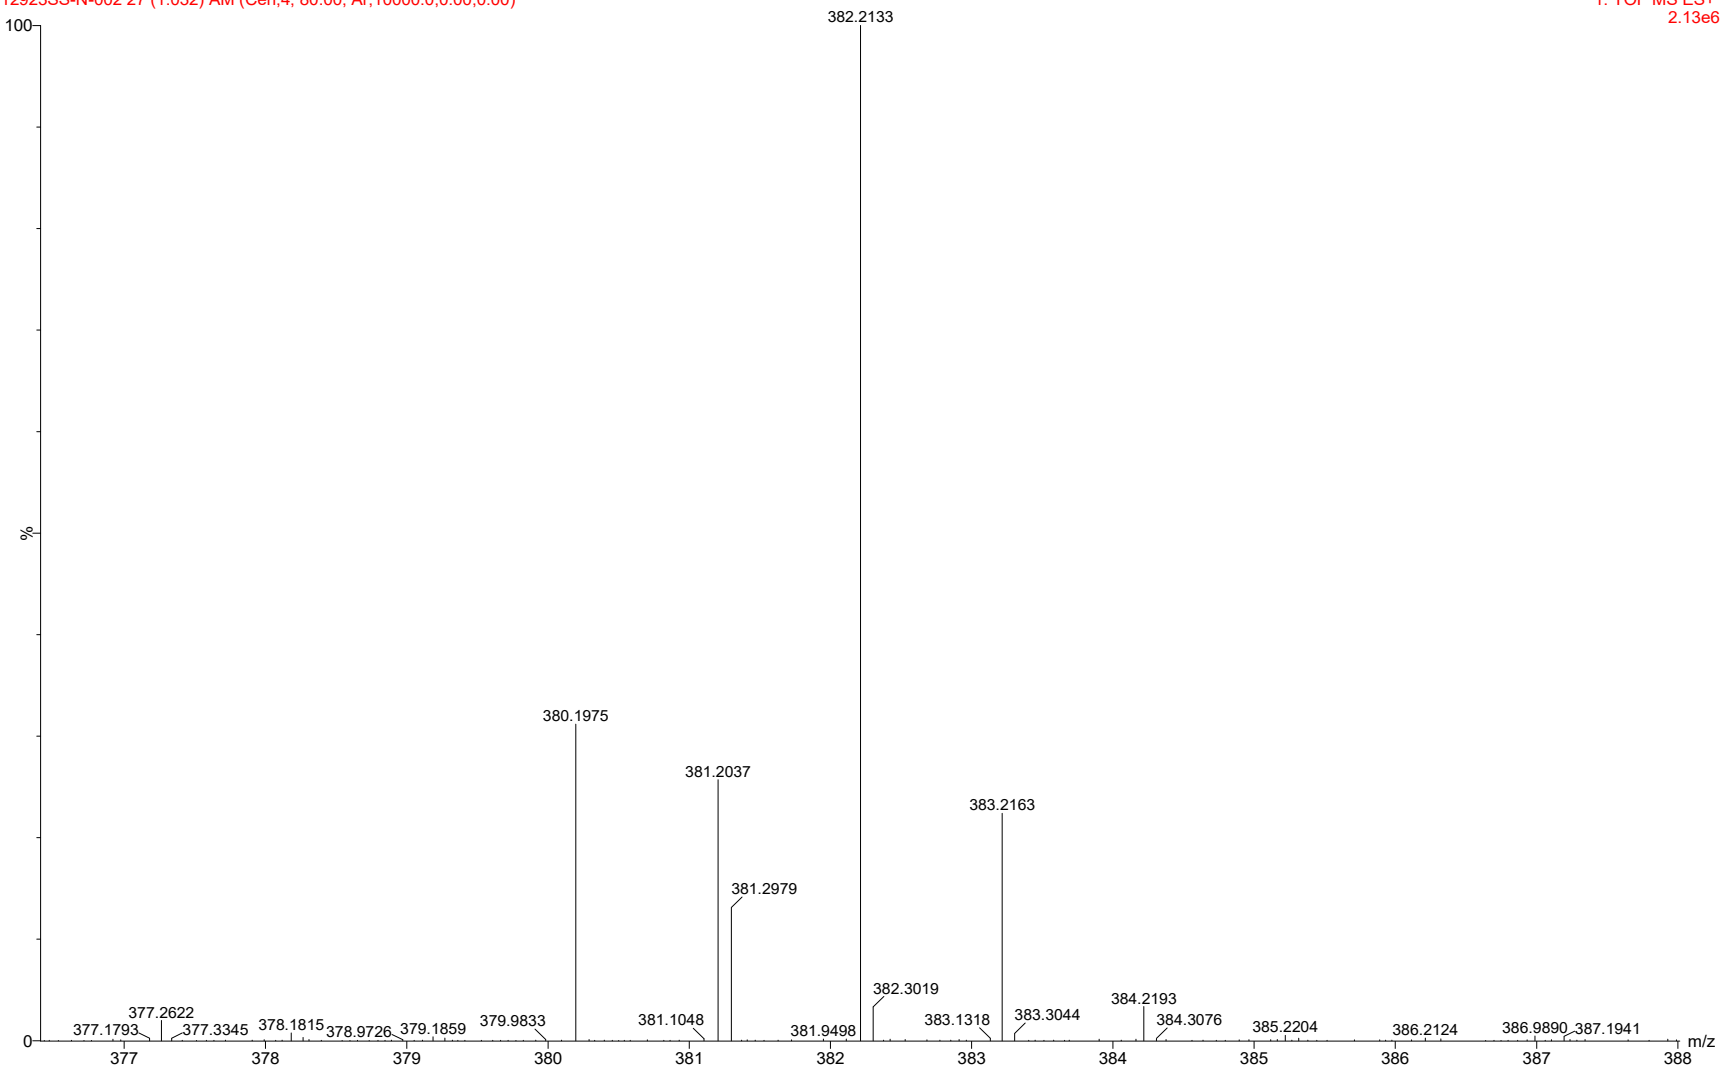

HRMS of TPS-A

TPS-B  
Gardner

12923SS-O-002 27 (1.033) AM (Cen,4, 80.00, Ar,10000.0,0.00,0.00)

SYNAPT G2-Si#UGA589

22-Aug-2019 13:21:31

1: TOF MS ES+  
2.74e7

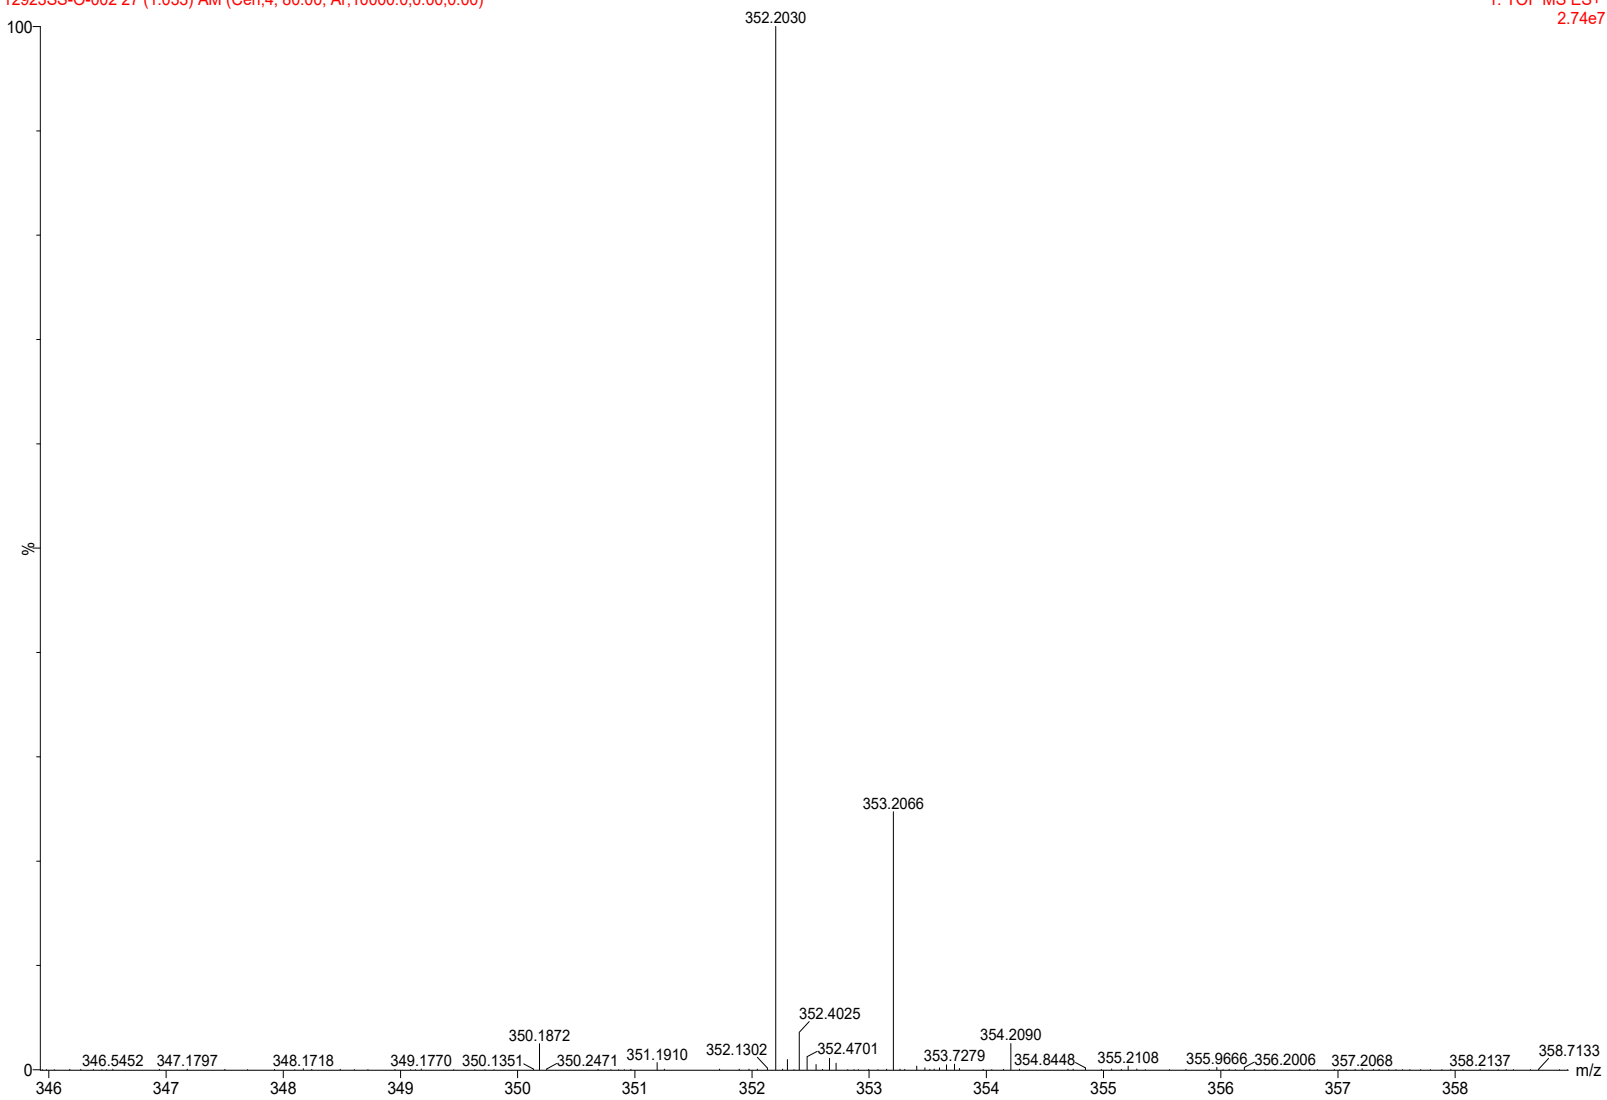

HRMS of TPS-B

S54

TPS-2  
Gardner

SYNAPT G2-Si#UGA589

22-Aug-2019 12:59:28

12923SS-M-002 28 (1.065) AM (Cen,4, 80.00, Ar,10000.0,0.00,0.00)

1: TOF MS ES+  
3.40e7

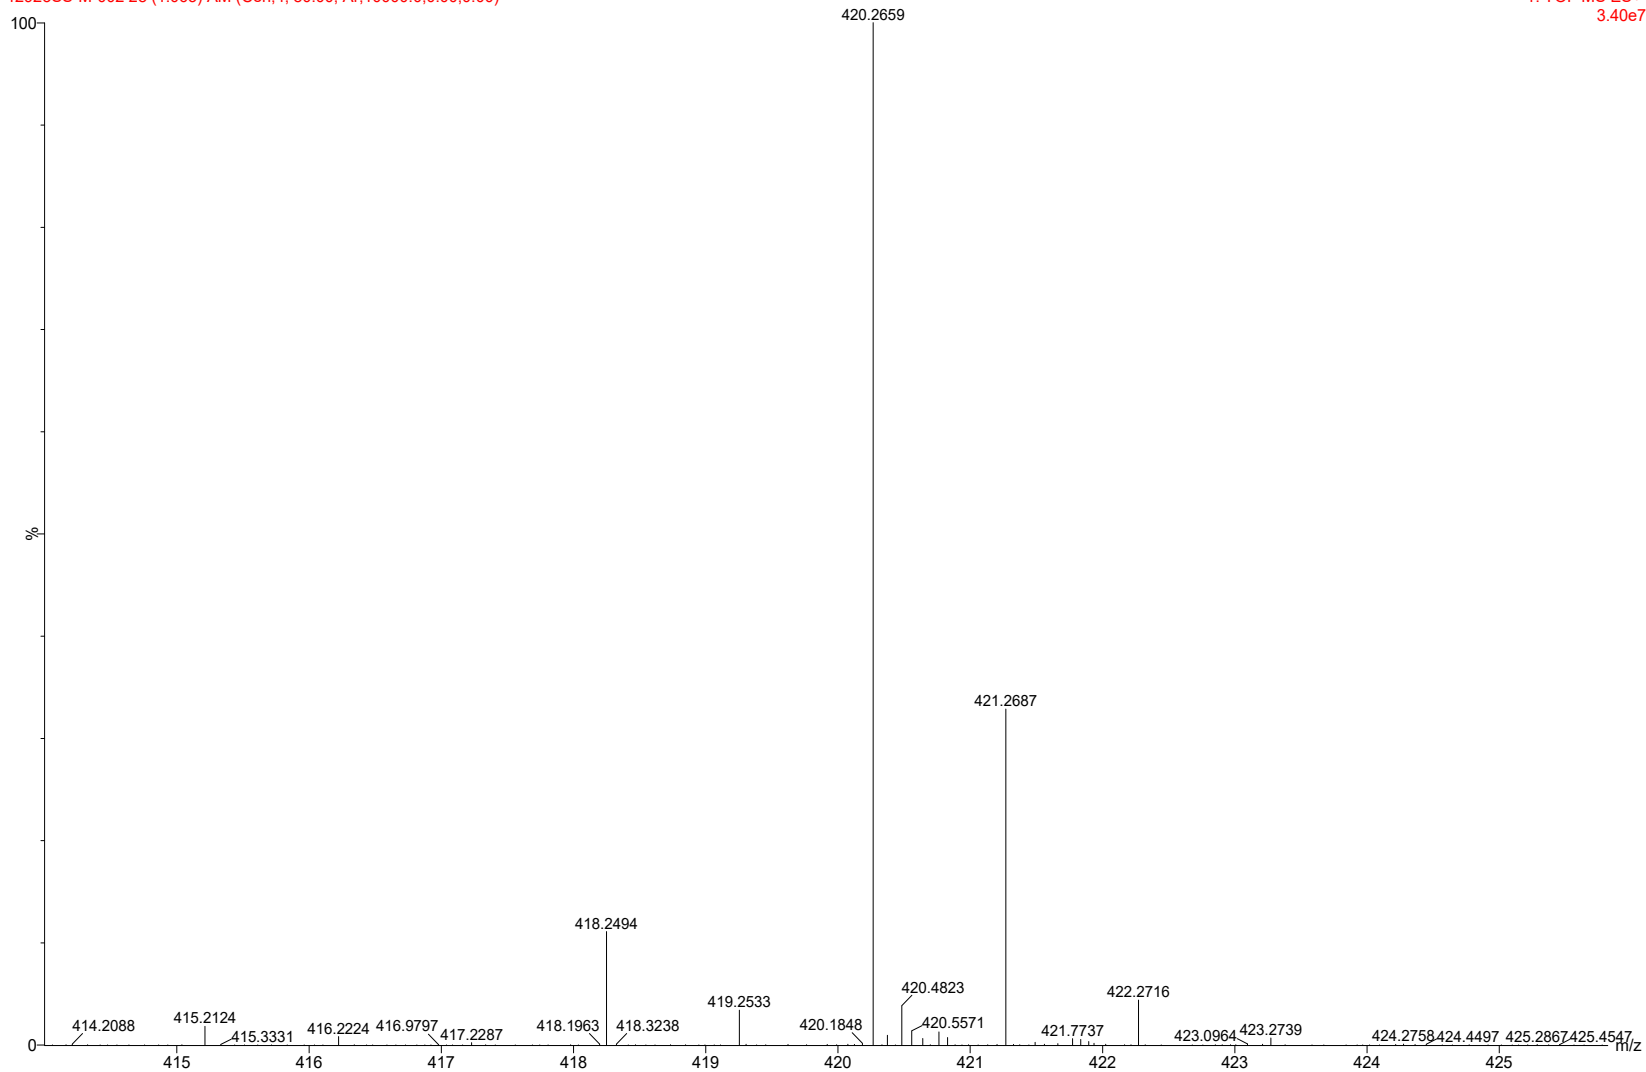

HRMS of TPS-2

TPS-17  
Gardner

13077SS-021 27 (1.033) AM (Cen,4, 80.00, Ar,10000.0,0.00,0.00); Cm (27:30)

SYNAPT G2-Si#UGA589

24-Jul-2020 14:18:06

1: TOF MS ES+  
3.54e6

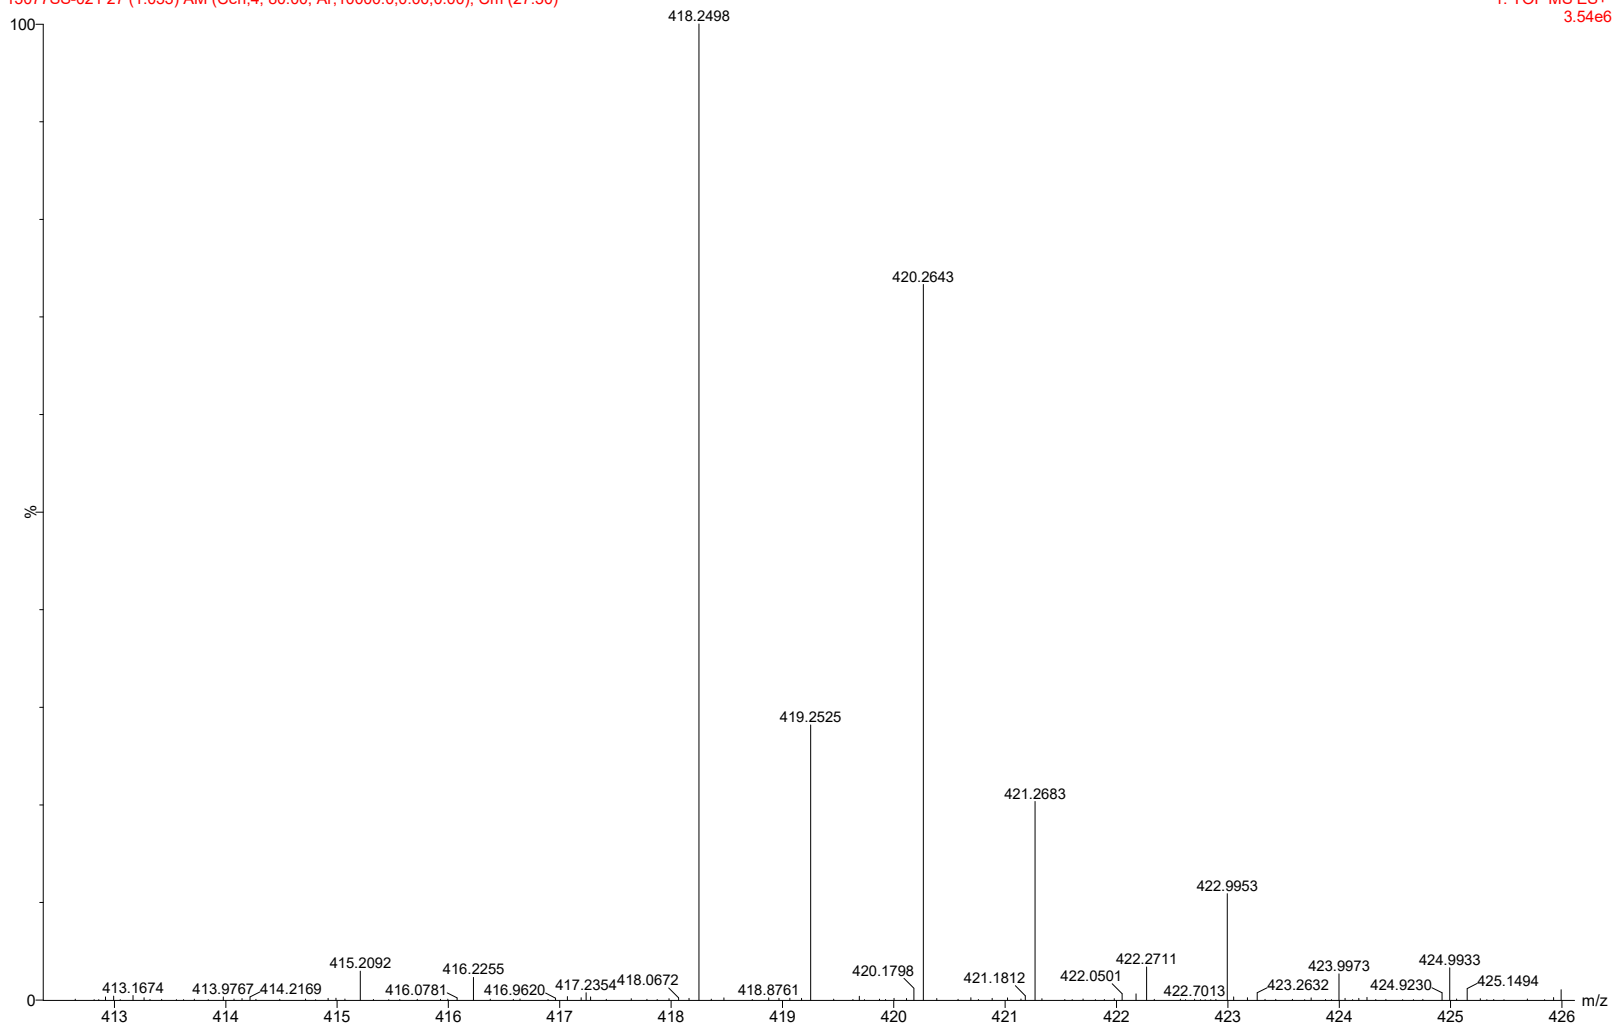

HRMS of TPS-6



V-3  
Gardner

SYNAPTG2-Si#UGA589

21-Aug-2020 13:00:18

13104SS-003 28 (1.066) AM (Cen,4, 80.00, Ar,10000.0,0.00,0.00)

1: TOF MS ES+  
1.70e7

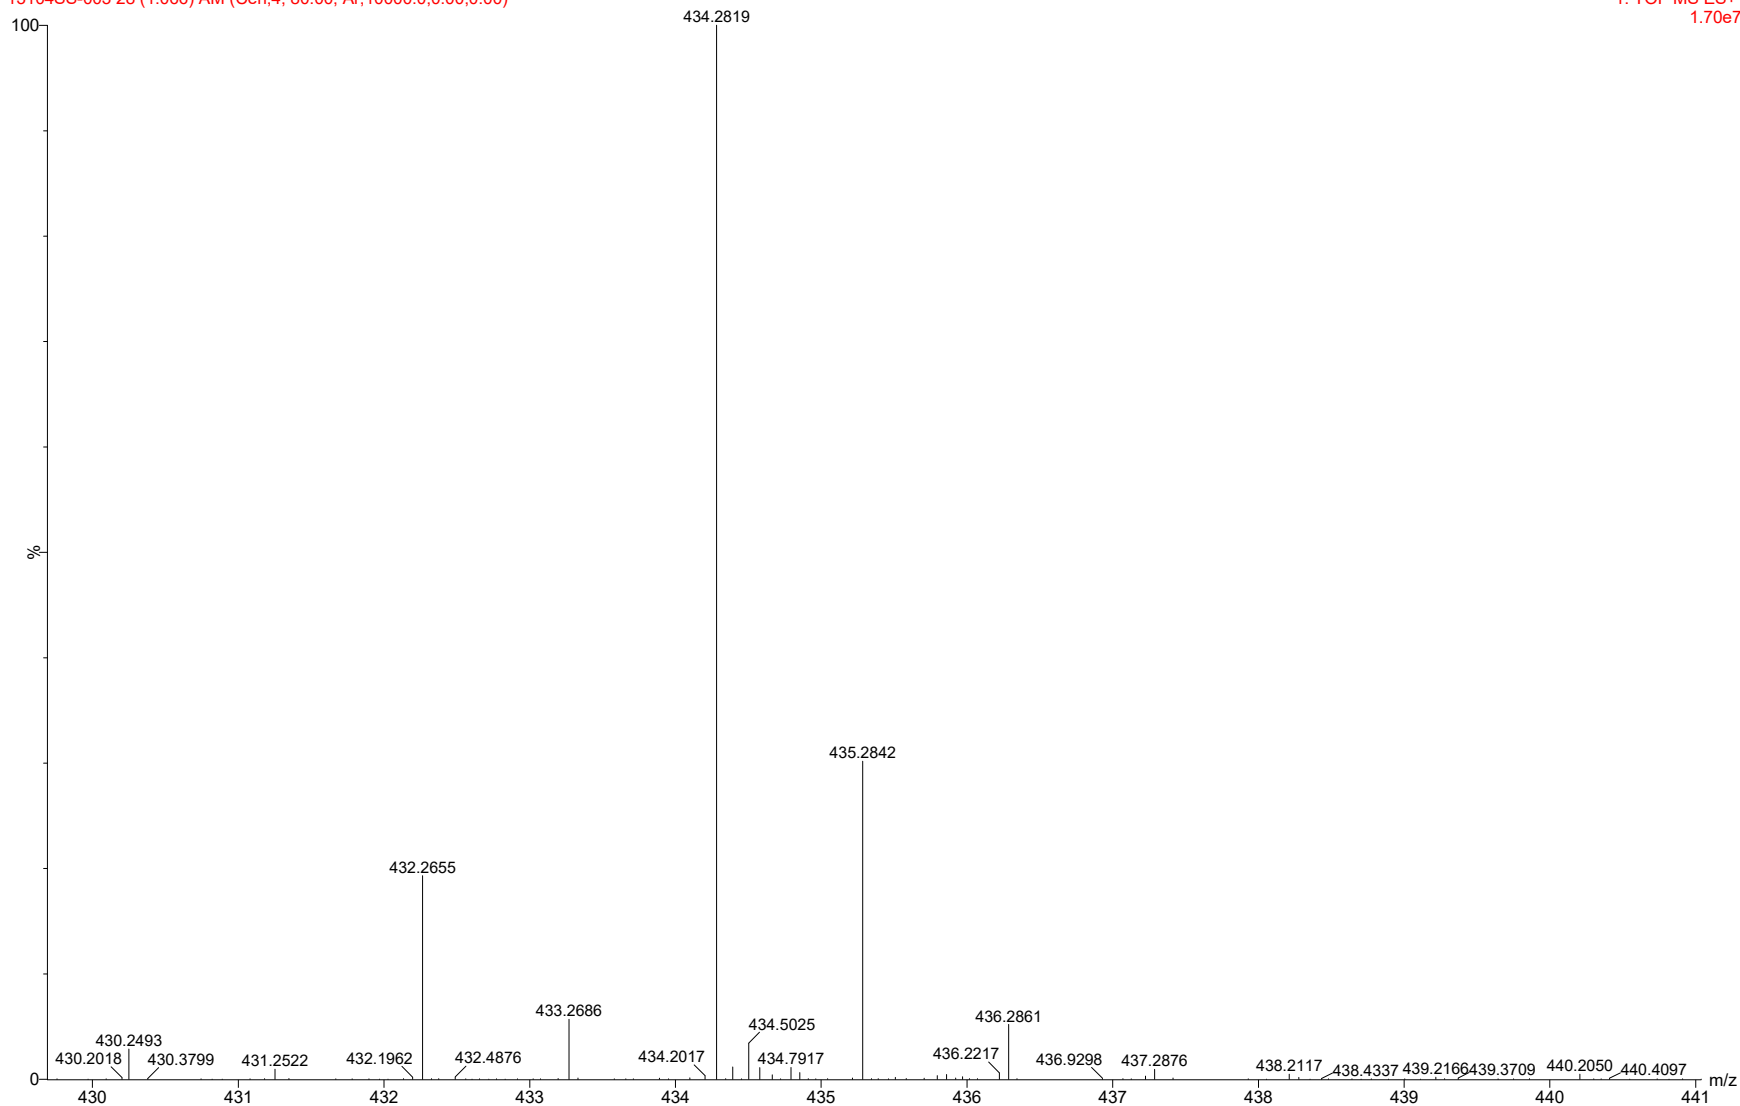

HRMS of TPS-7

S57

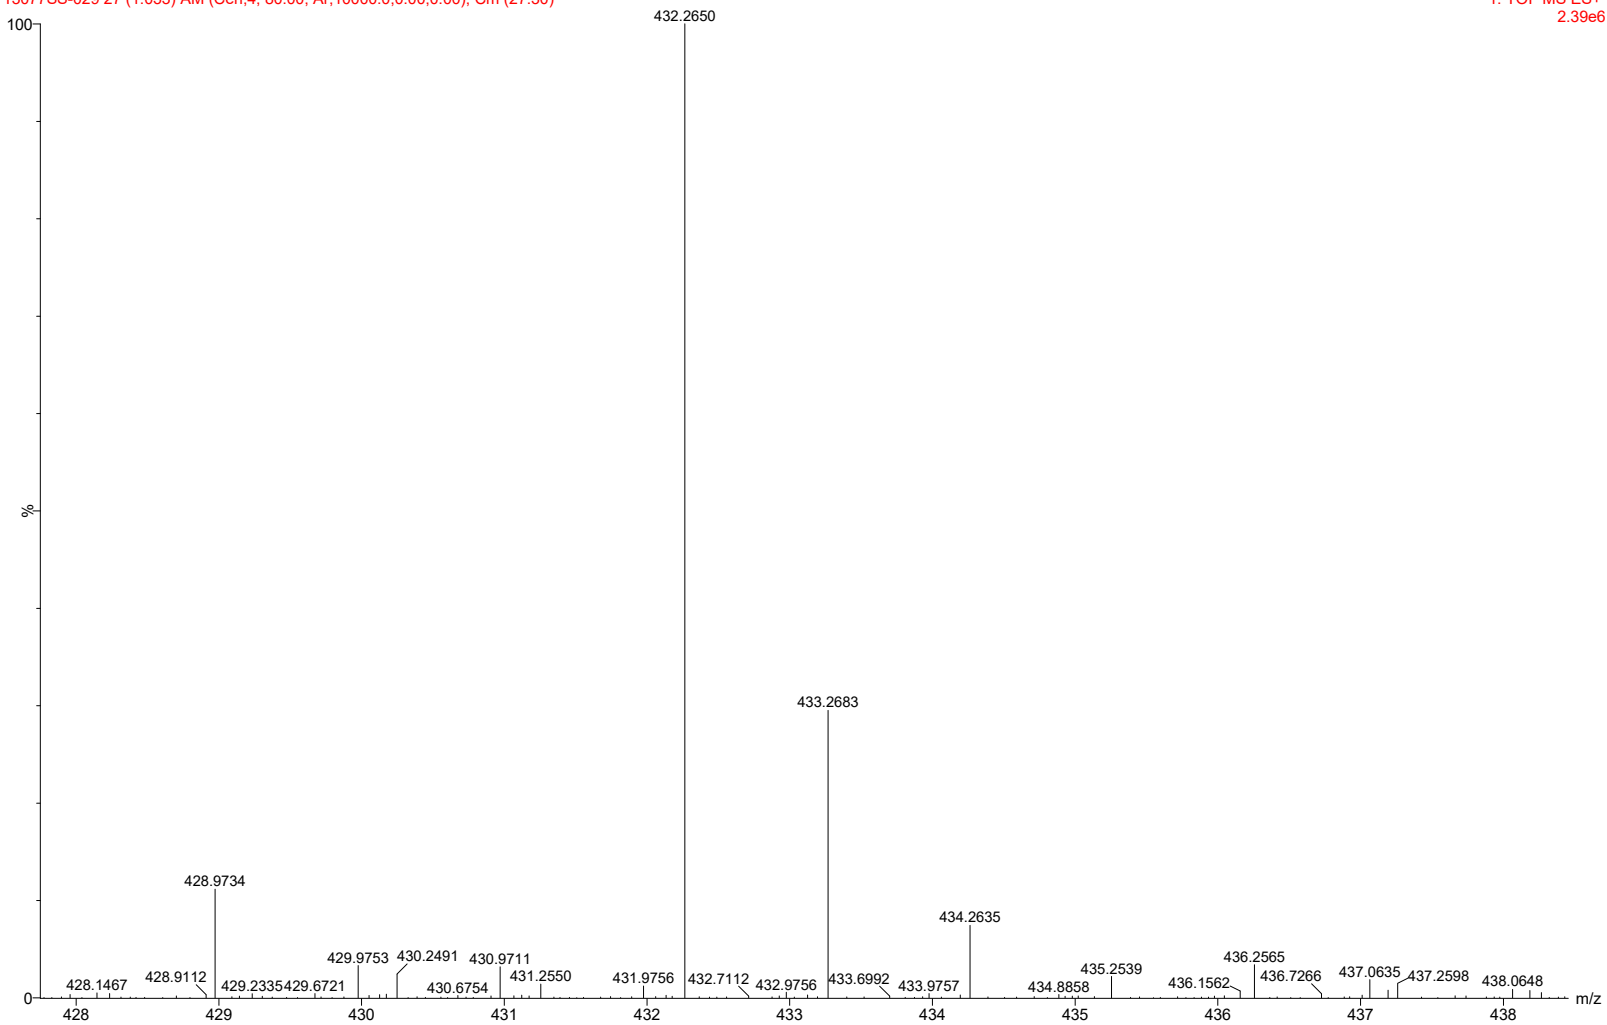

HRMS of TPS-8

TPS-22  
Gardner

13077SS-033 28 (1.066) AM (Cen,4, 80.00, Ar,10000.0,0.00,0.00); Cm (28:30)

SYNAPT G2-Si#UGA589

24-Jul-2020 15:01:35

1: TOF MS ES+  
2.75e6

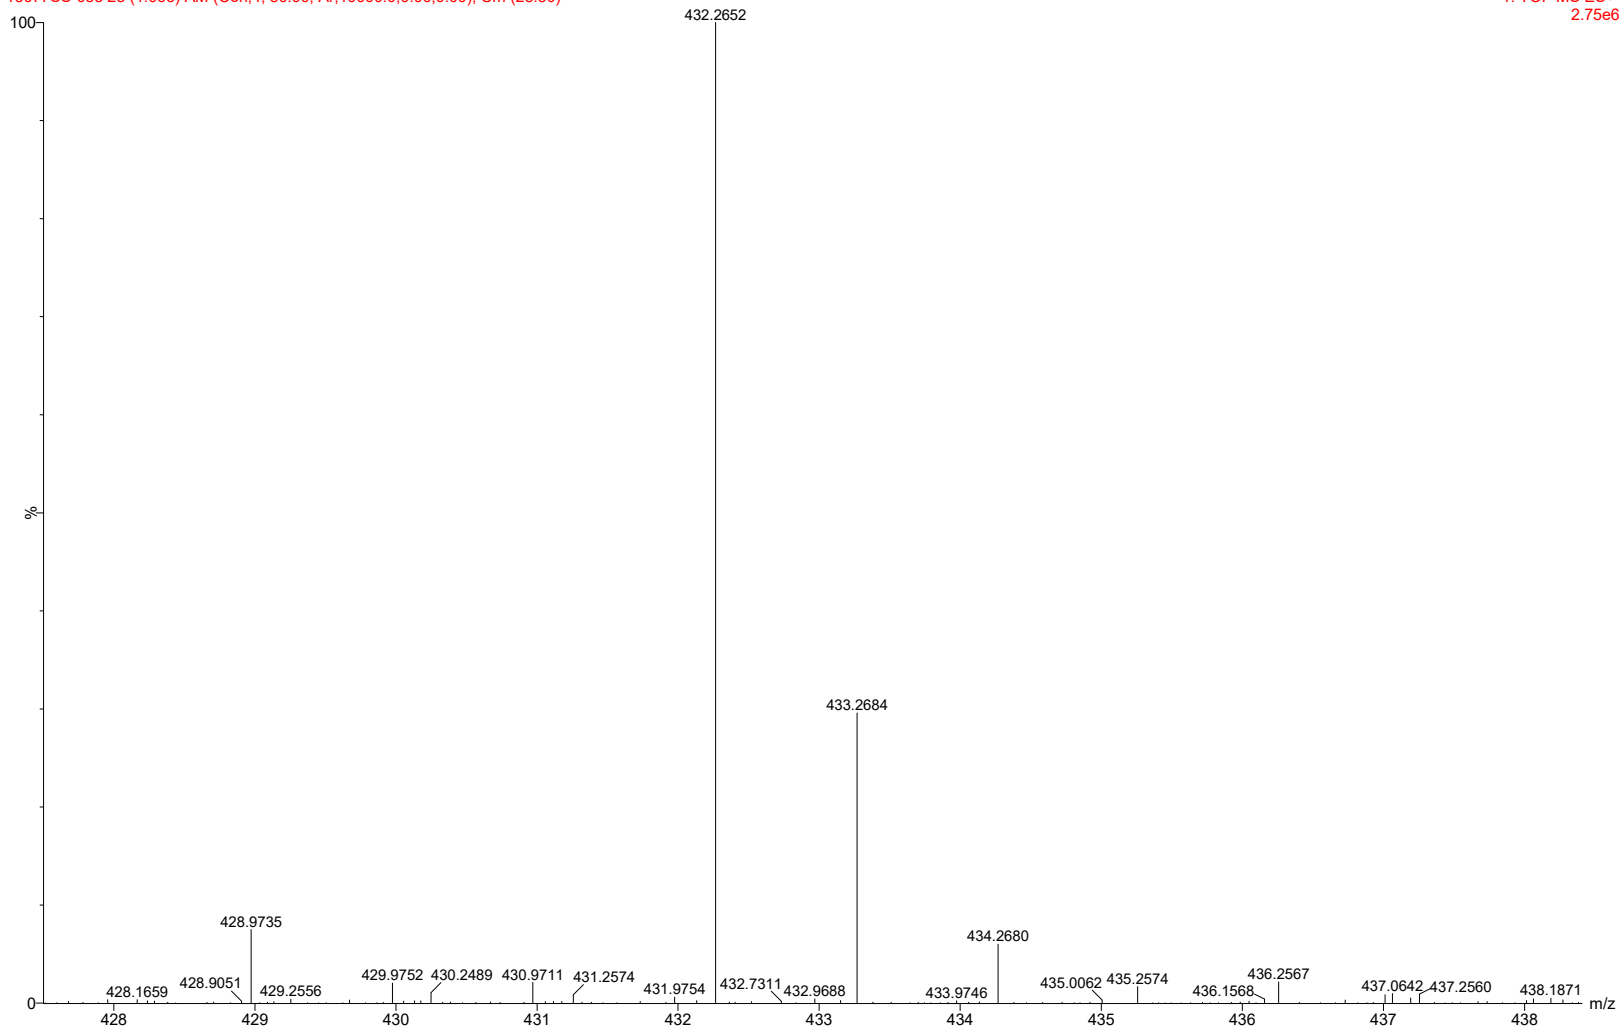

HRMS of TPS-9

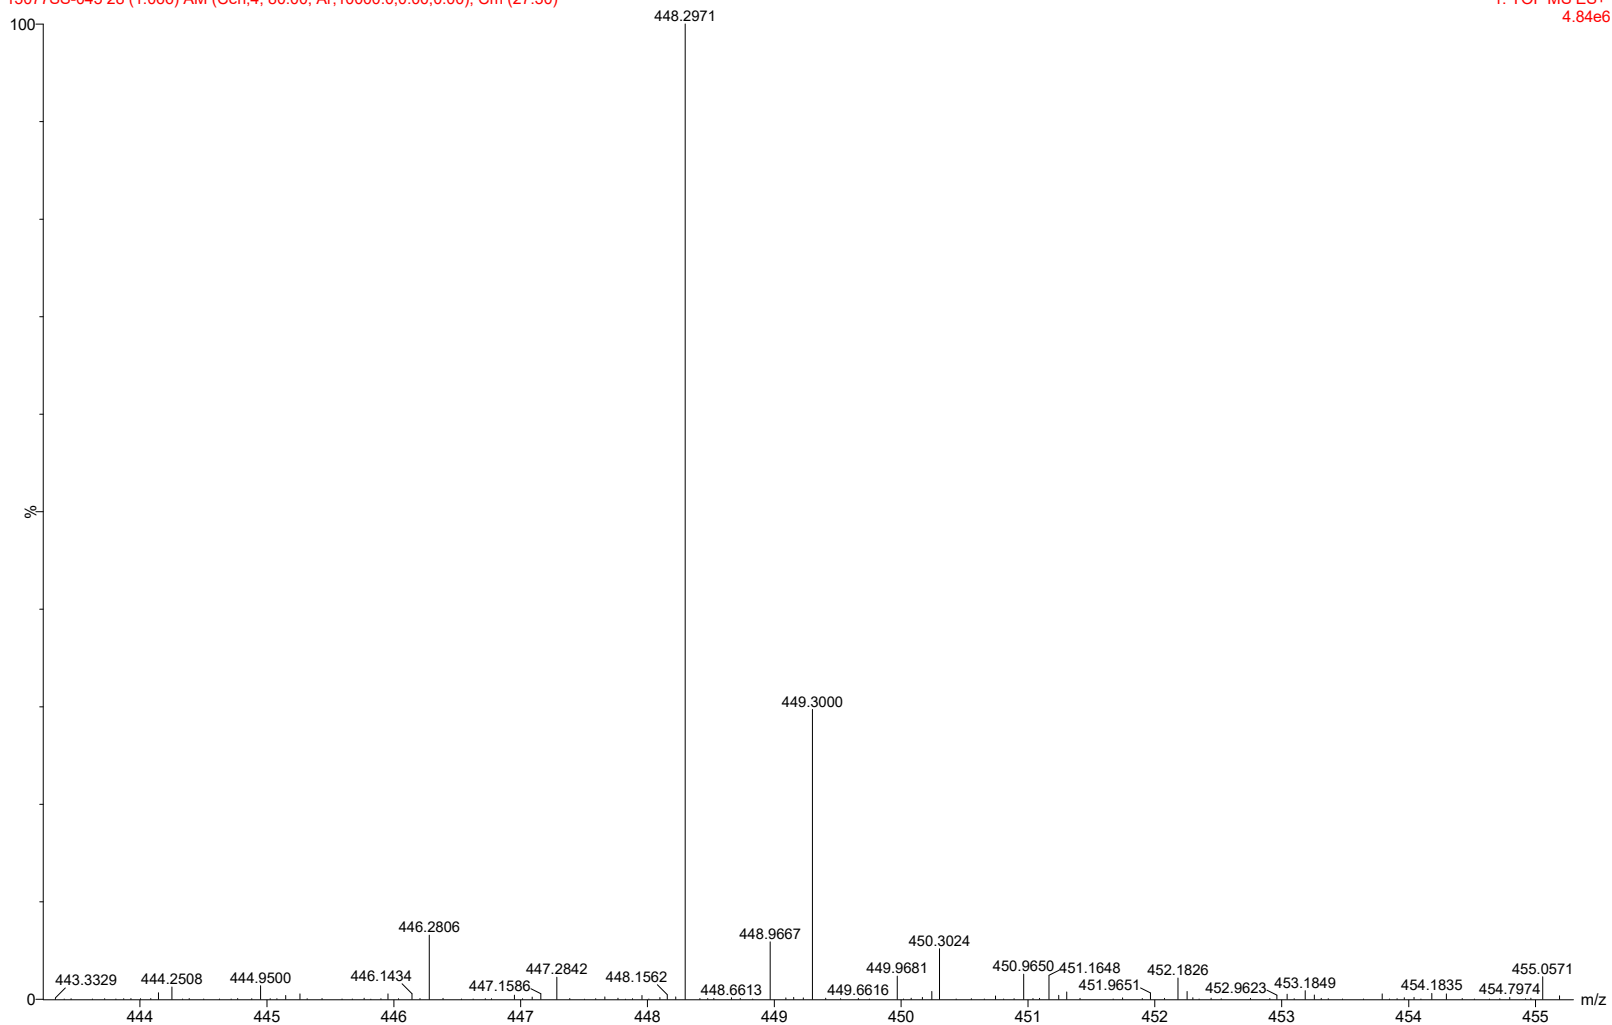

HRMS of TPS-10

TPS-4  
Gardner

SYNAPTG2-Si#UGA589

24-Jul-2020 12:55:54

13077SS-008 28 (1.066) AM (Cen,4, 80.00, Ar,10000.0,0.00,0.00); Cm (28:30)

1: TOF MS ES+  
3.49e6

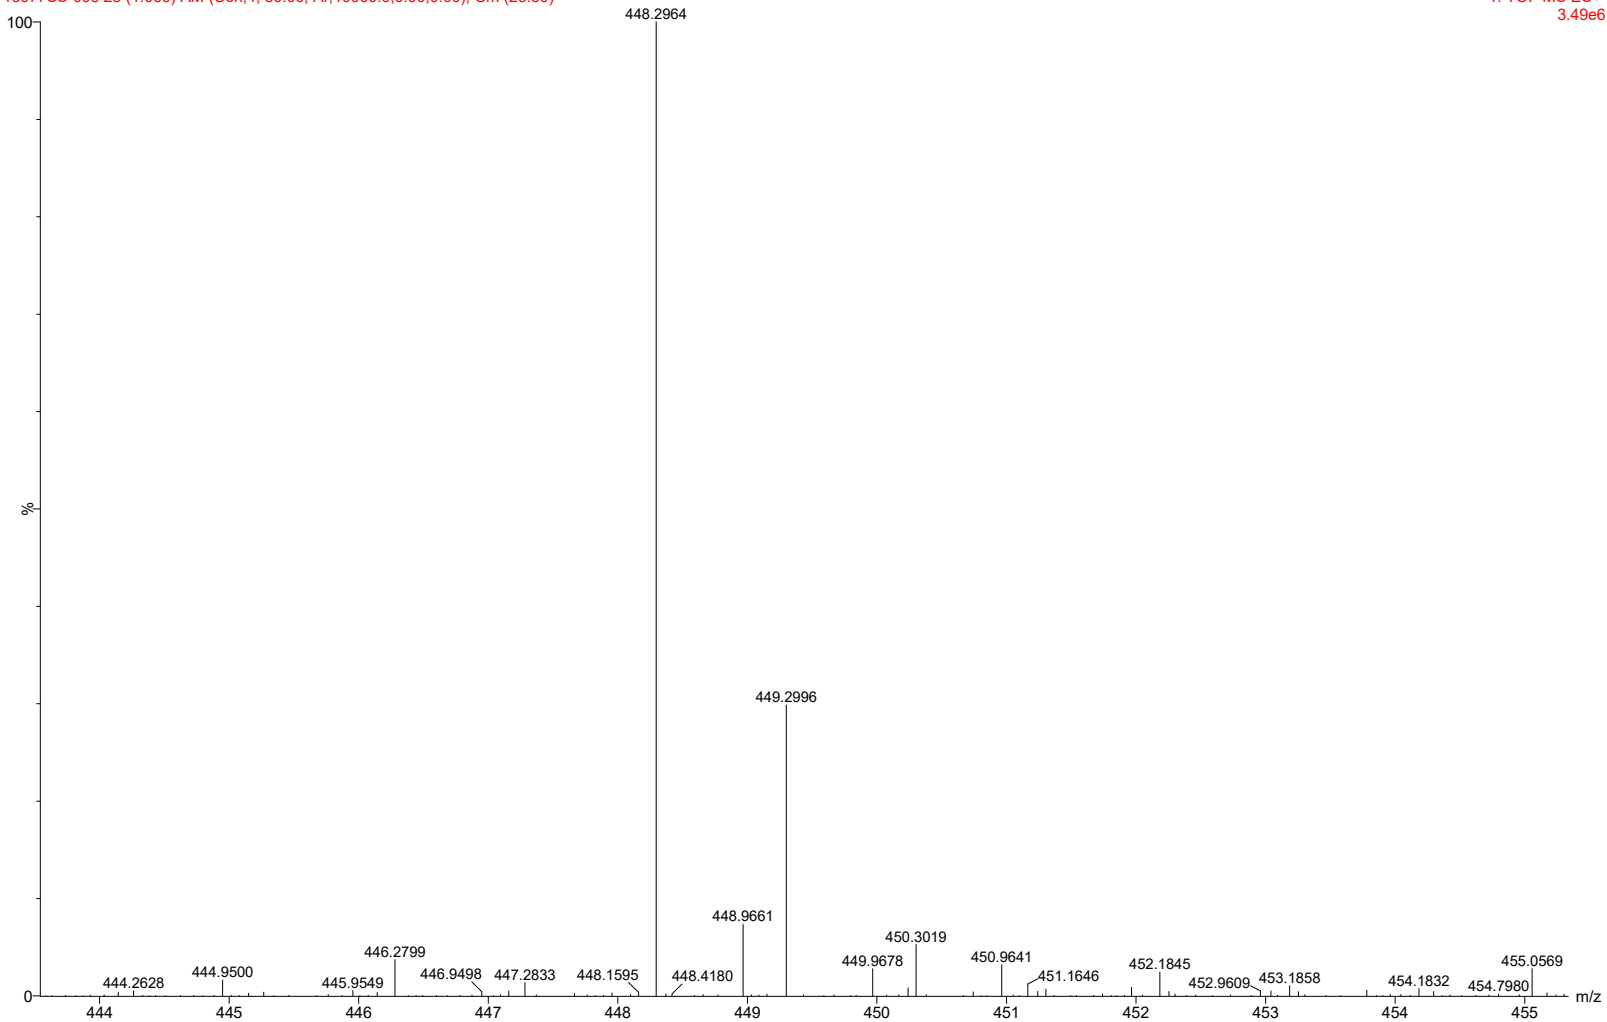

HRMS of TPS-11

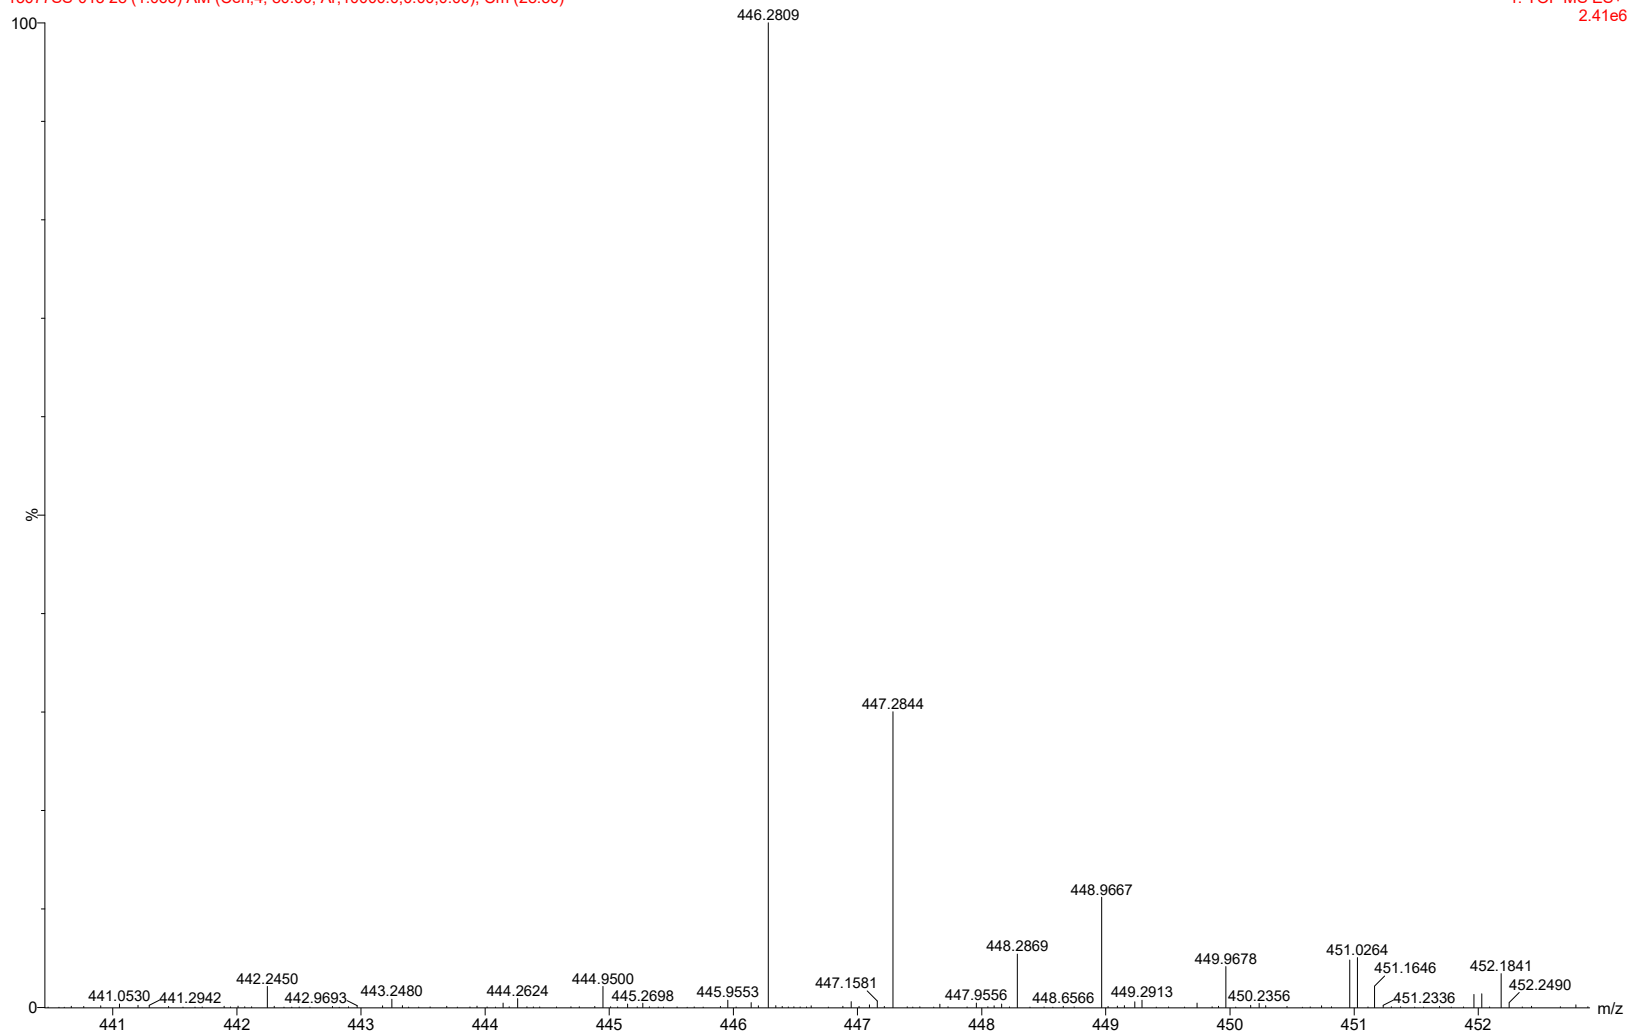

HRMS of TPS-13

TPS-18  
Gardner

13077SS-025 28 (1.066) AM (Cen,4, 80.00, Ar,10000.0,0.00,0.00); Cm (28:30)

SYNAPTG2-Si#UGA589

24-Jul-2020 14:32:30

1: TOF MS ES+  
4.53e6

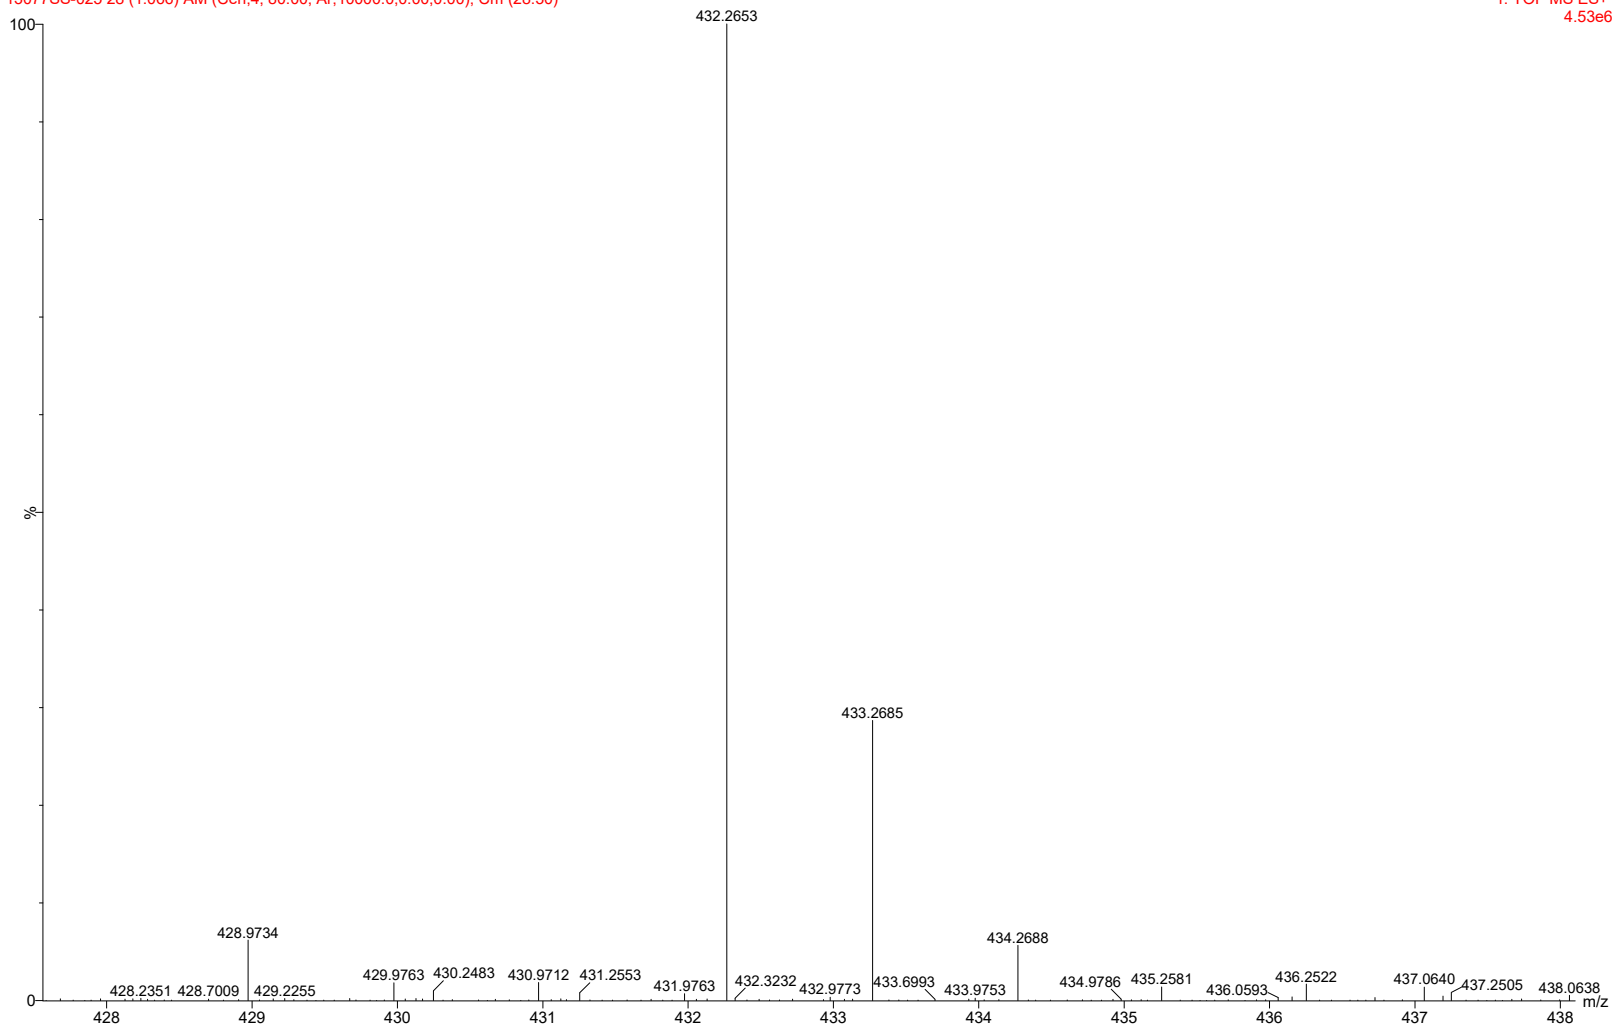

HRMS of TPS-16

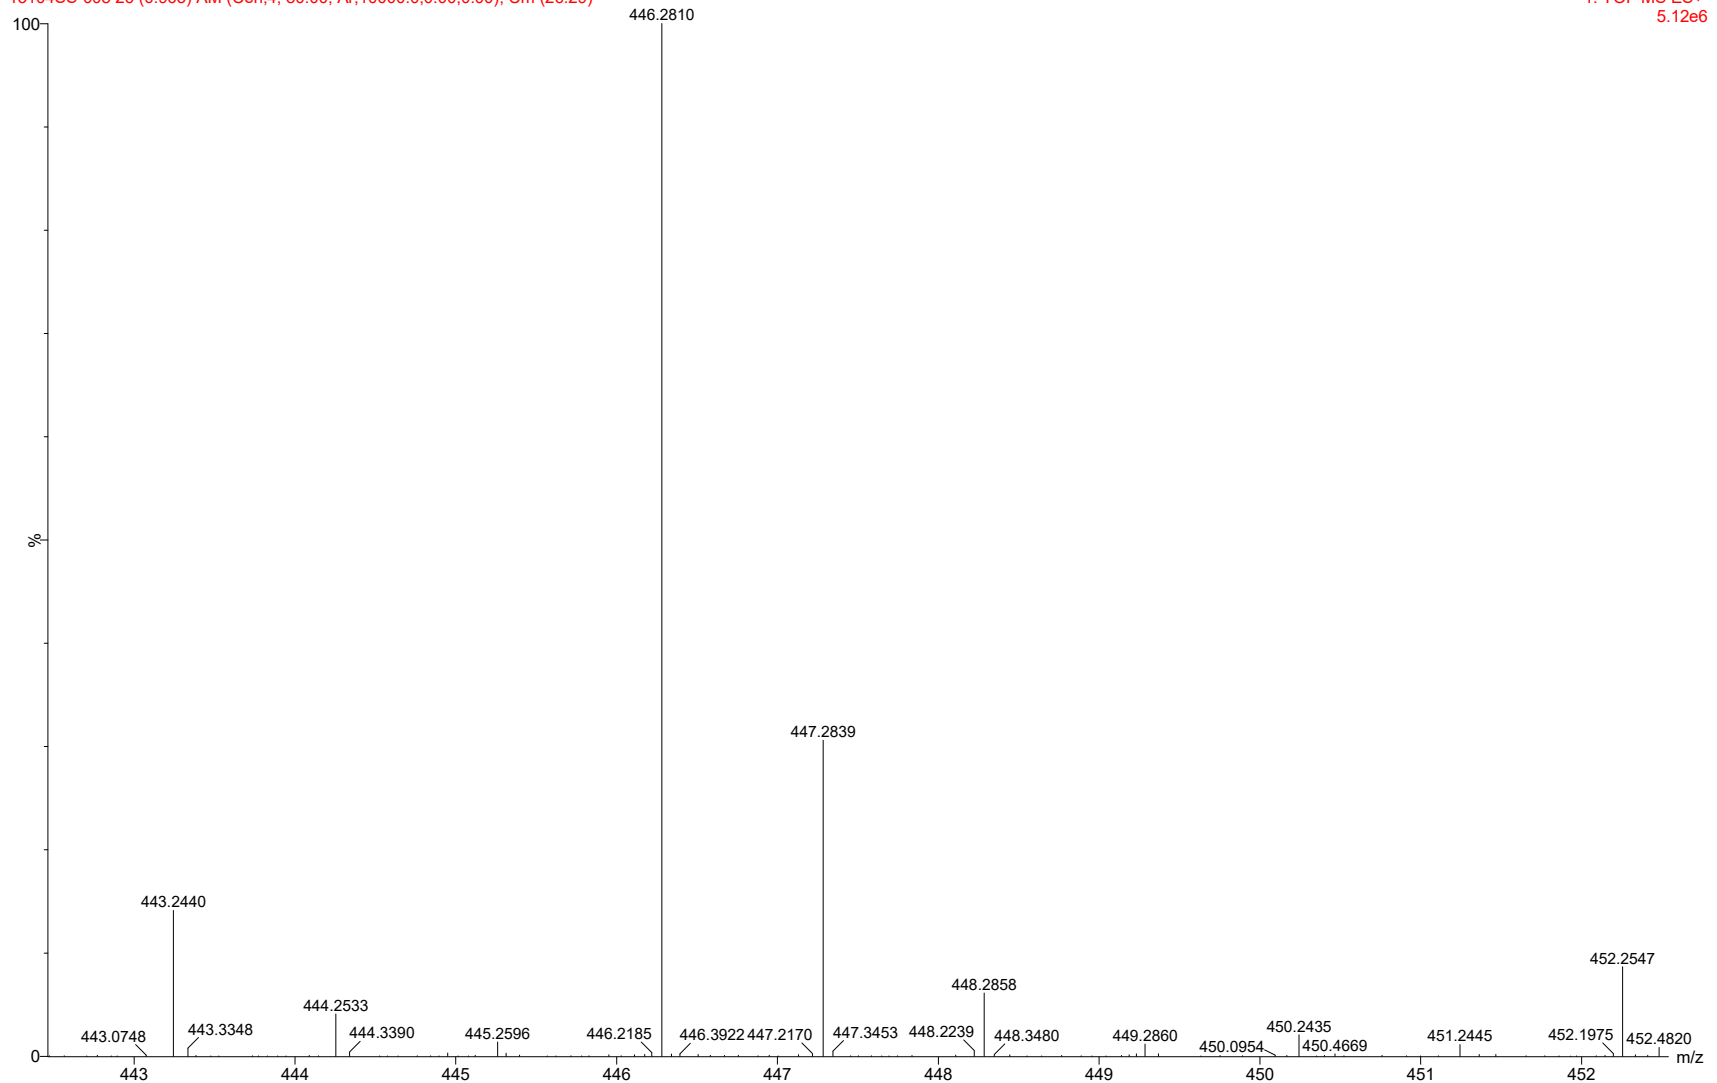

HRMS of TPS-18



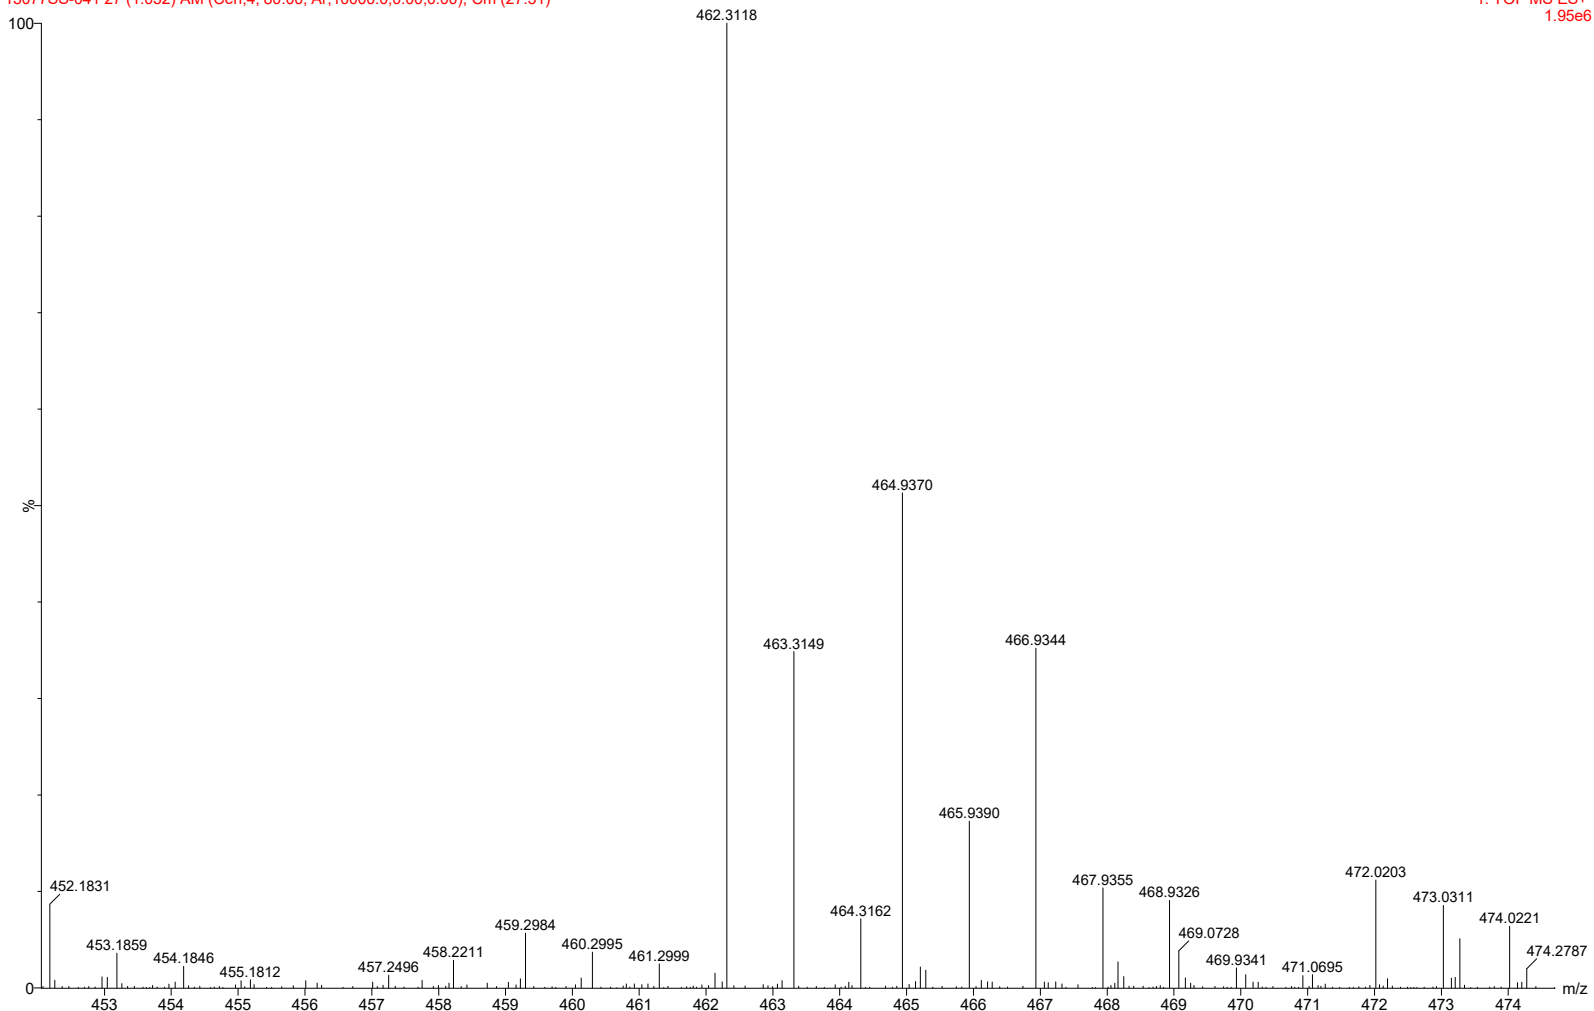

HRMS of TPS-19

V-59  
Gardner

SYNAPT G2-Si#UGA589

21-Aug-2020 14:10:52

13104SS-010 26 (0.963) AM (Cen,4, 80.00, Ar,10000.0,0.00,0.00); Cm (25:29)

1: TOF MS ES+  
1.15e7

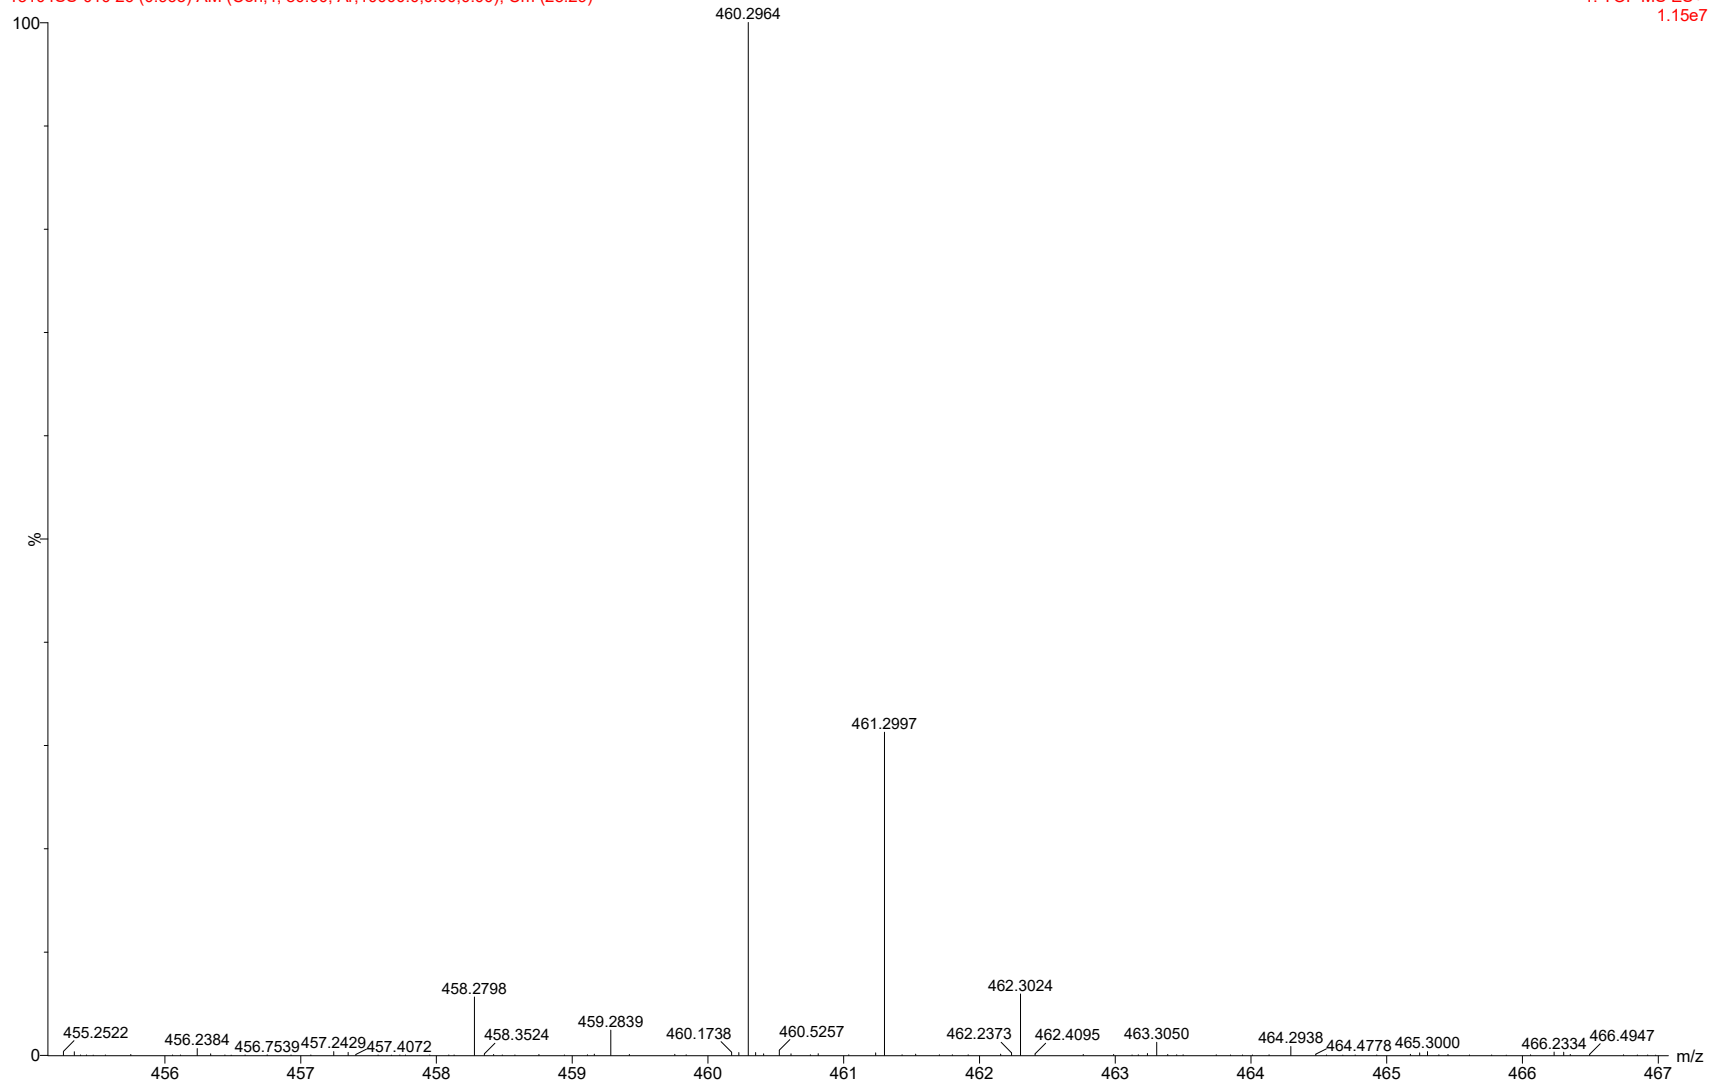

HRMS of TPS-22

TPS-14  
Gardner

12923SS-A-002 31 (1.167) AM (Cen,4, 80.00, Ar,10000.0,0.00,0.00)

SYNAPT G2-Si#UGA589

22-Aug-2019 10:49:07

1: TOF MS ES+  
2.08e7

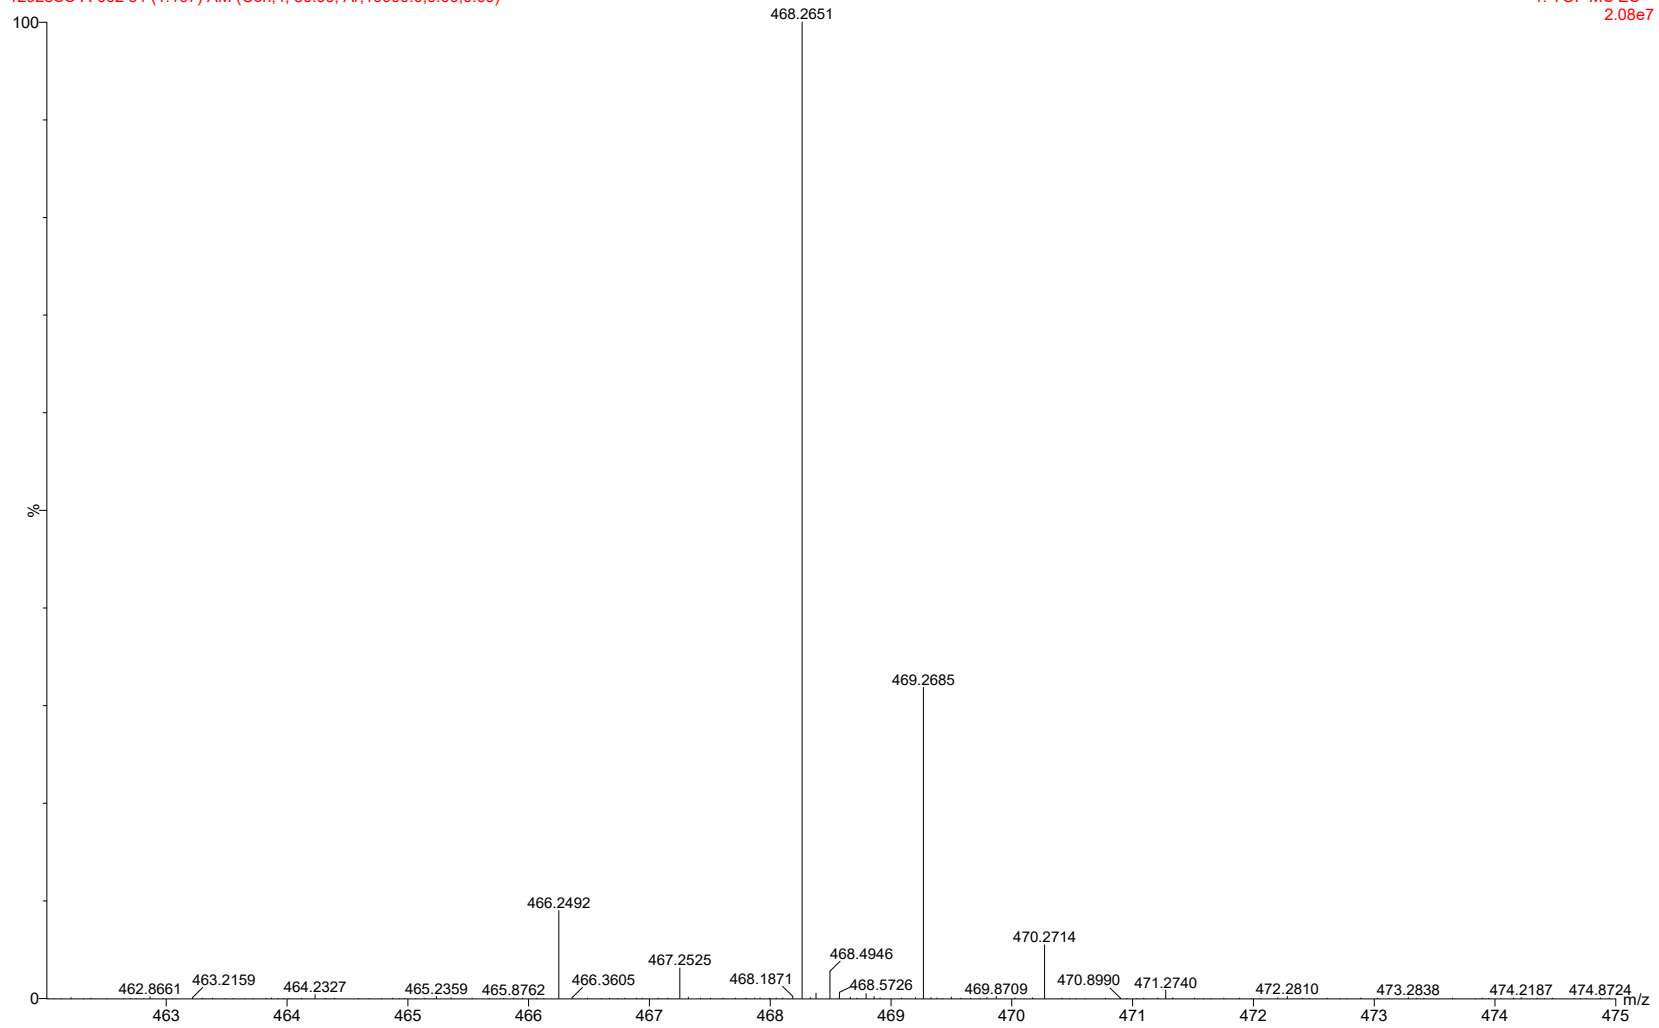

HRMS of TPS-24

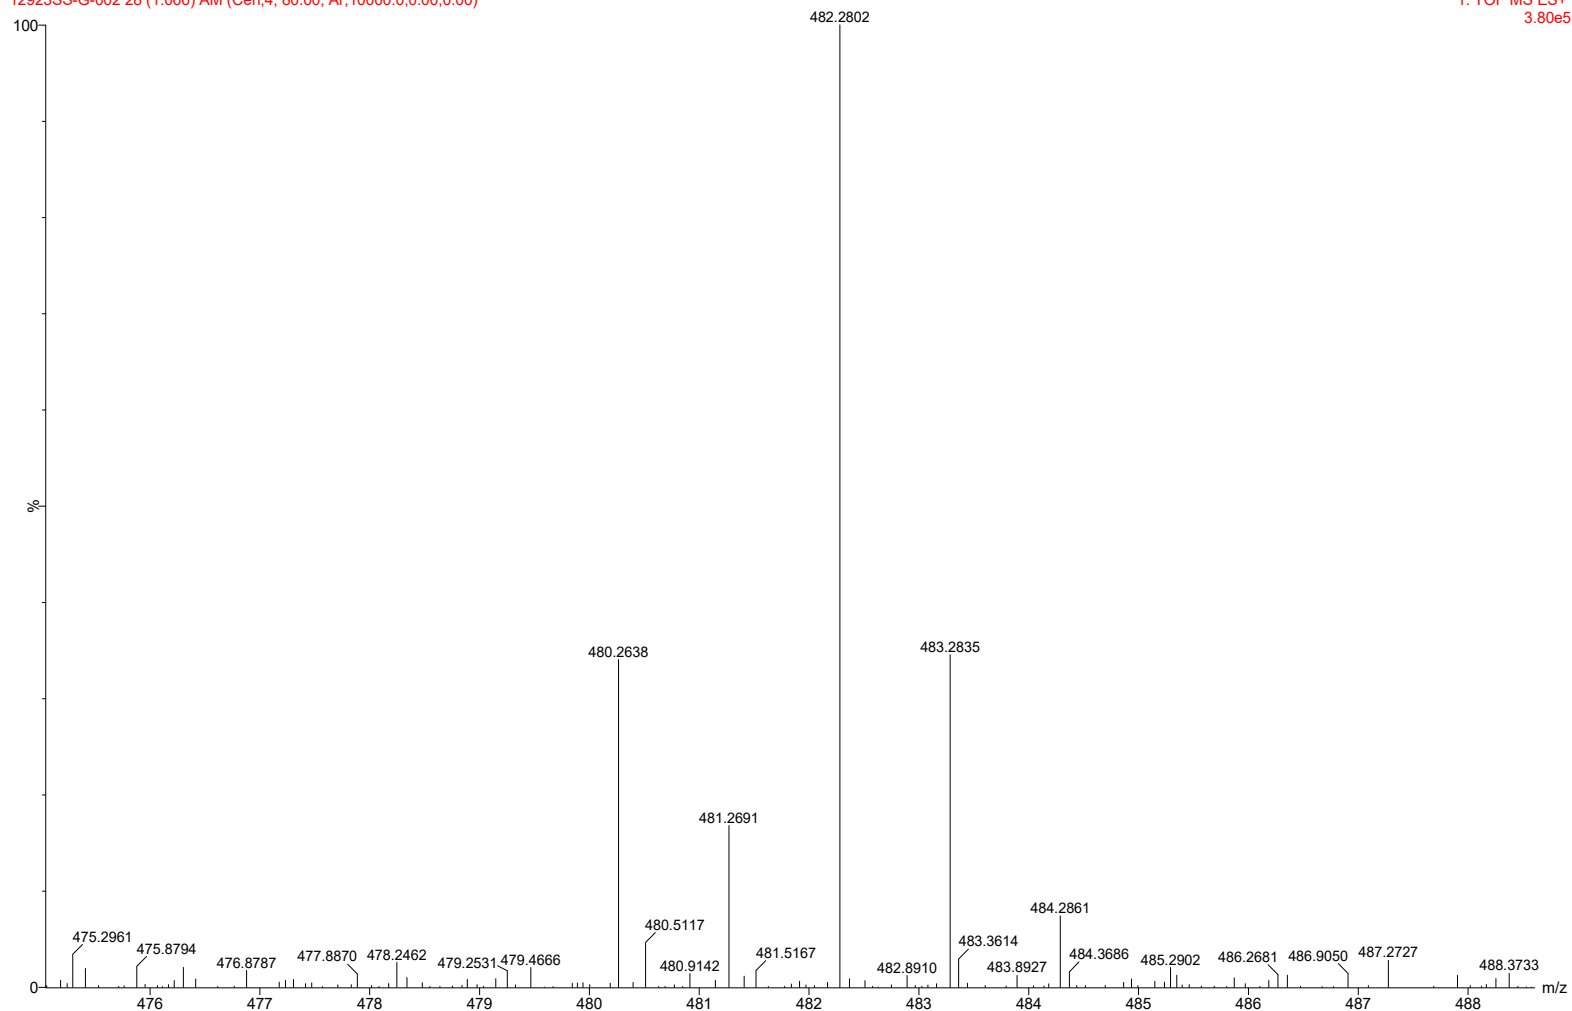

HRMS of TPS-25

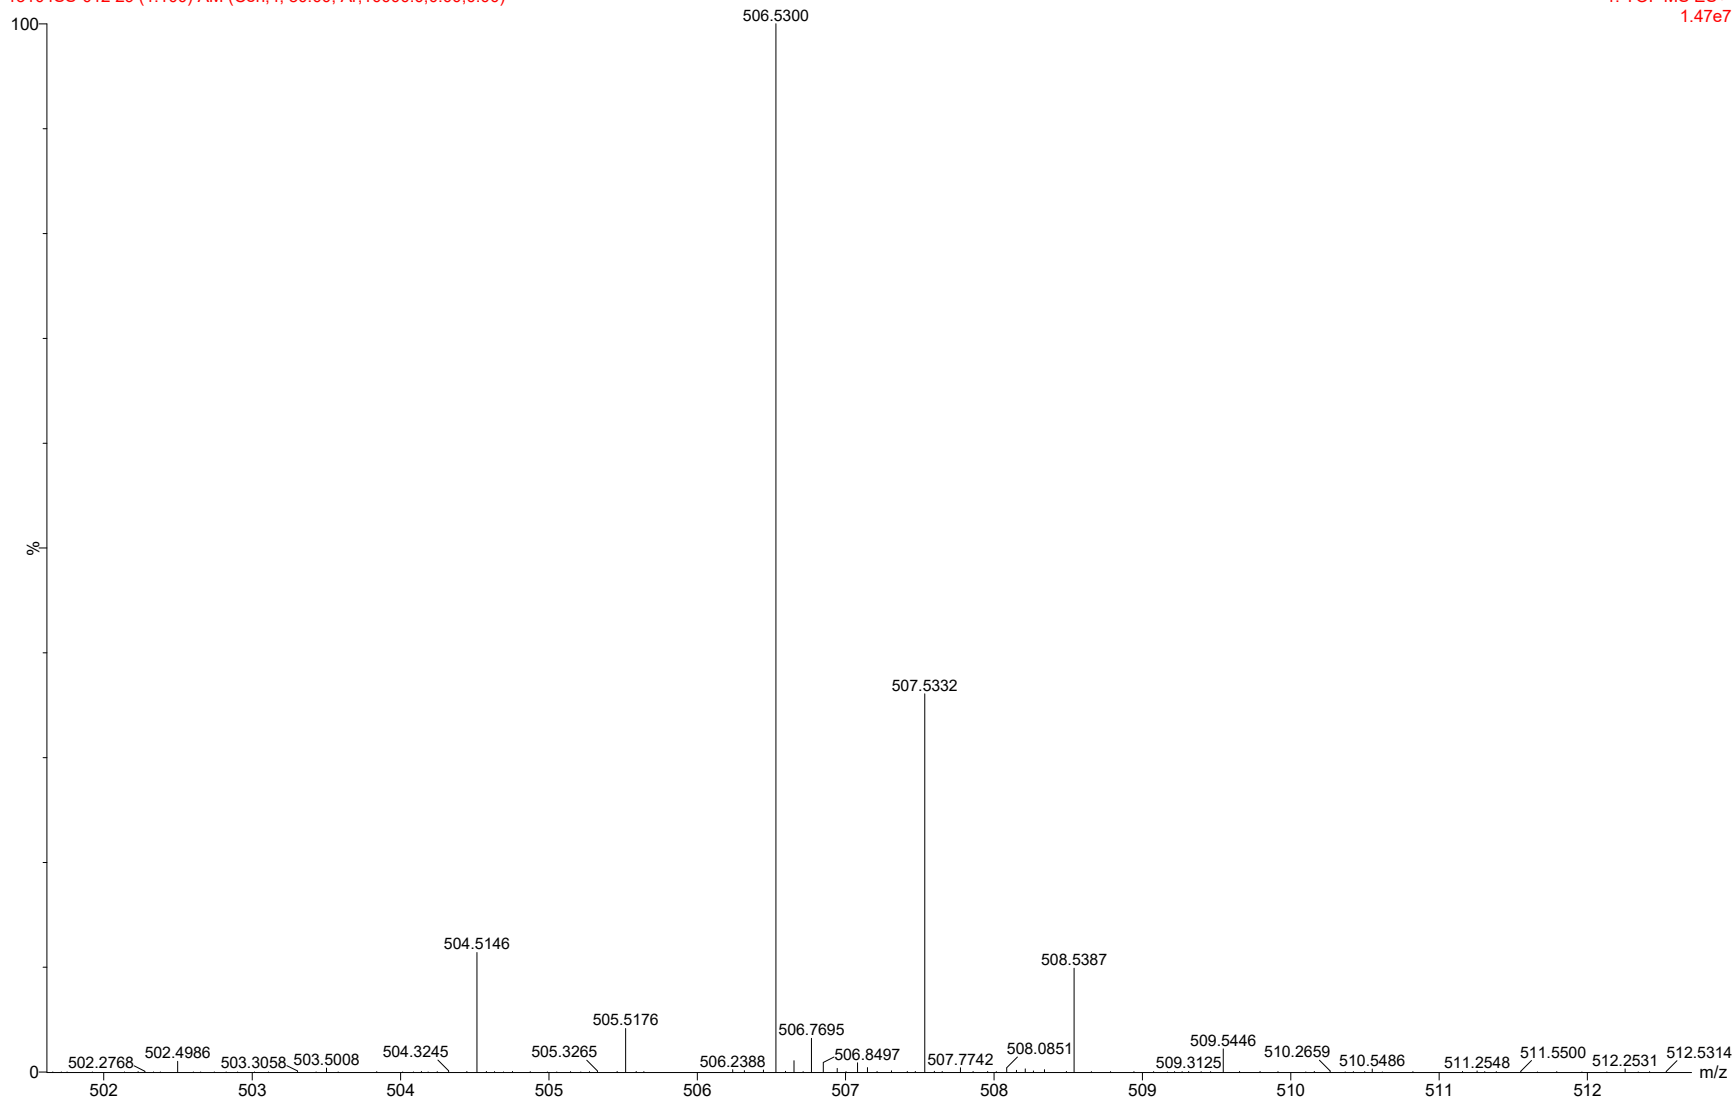

HRMS of TPS-26

V-32  
Gardner

SYNAPT G2-Si#UGA589

21-Aug-2020 14:27:53

13104SS-014 26 (0.963) AM (Cen,4, 80.00, Ar,10000.0,0.00,0.00); Cm (25:29)

1: TOF MS ES+  
1.04e7

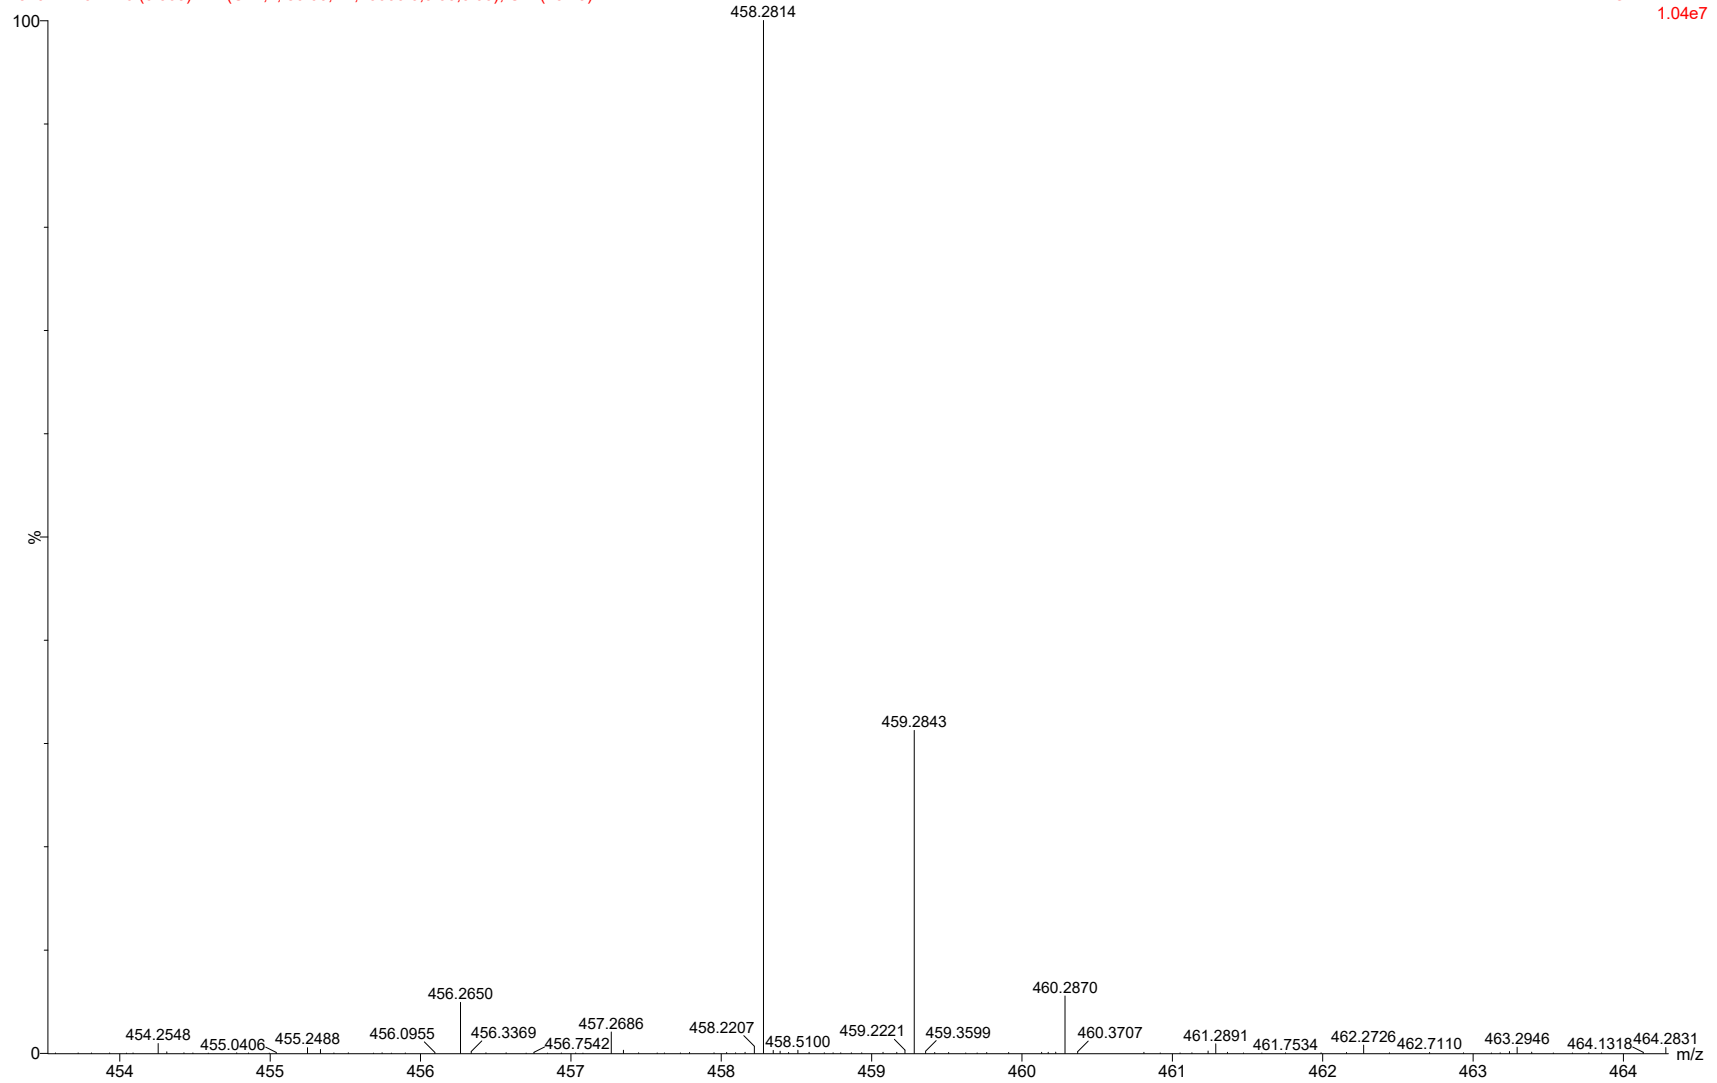

HRMS of TPS-27

S70

V-36  
Gardner

SYNAPT2-Si#UGA589

21-Aug-2020 14:35:10

13104SS-016 26 (0.963) AM (Cen.4, 80.00, Ar,10000.0,0.00,0.00); Cm (25:29)

1: TOF MS ES+  
7.93e6

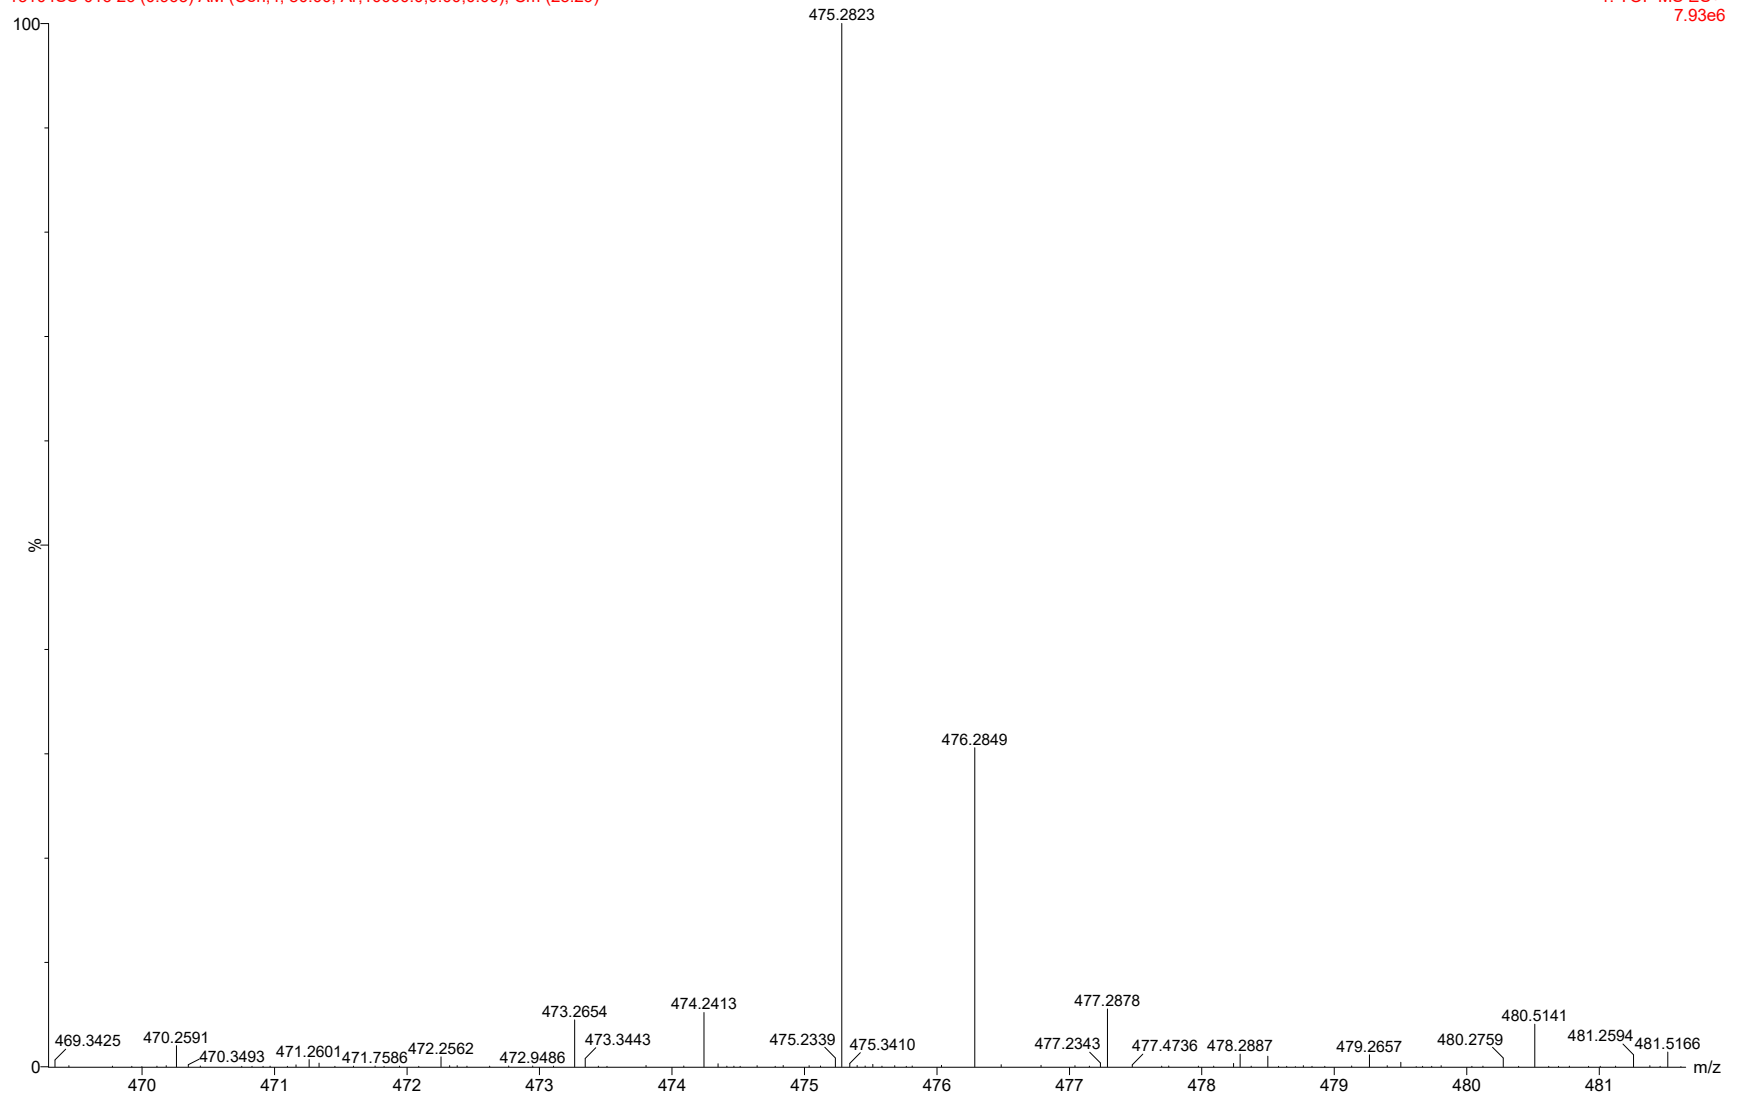

HRMS of TPS-34

TPS-44  
Gardner

12923SS-B-002 31 (1.167) AM (Cen,4, 80.00, Ar,10000.0,0.00,0.00)

SYNAPT G2-Si#UGA589

22-Aug-2019 11:00:00

1: TOF MS ES+  
2.62e7

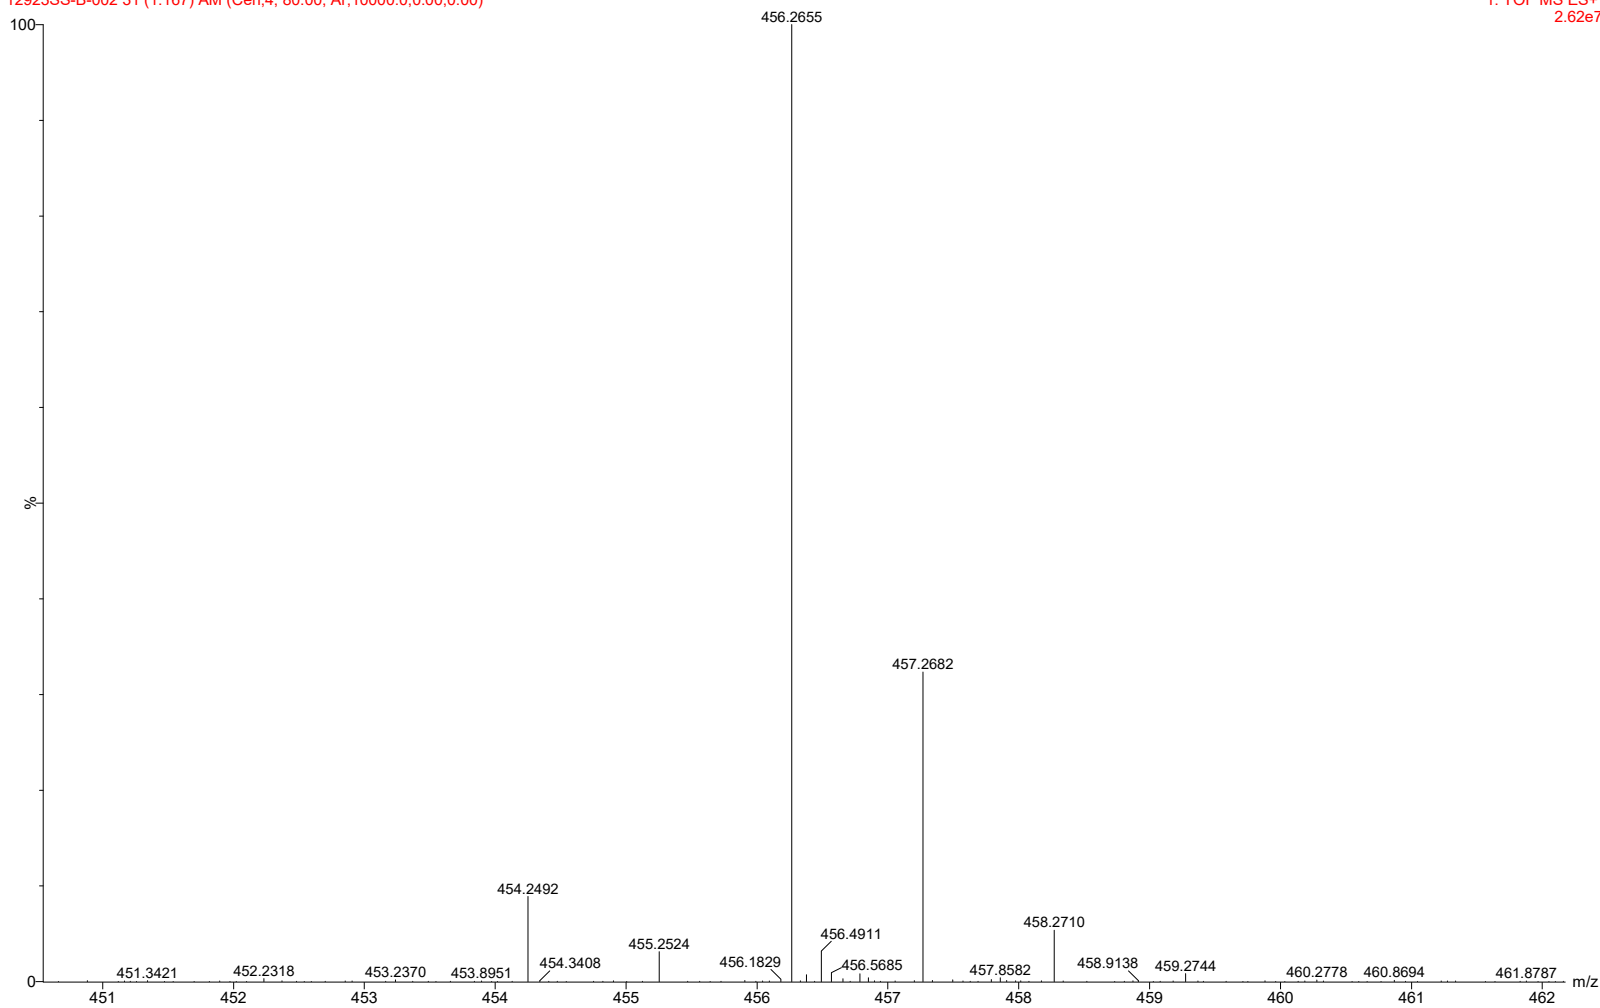

HRMS of TPS-46



TPS-41  
Gardner  
12923SS-E-002 30 (1.133) AM (Cen,4, 80.00, Ar,10000.0,0.00,0.00)

SYNAPT G2-Si#UGA589

22-Aug-2019 11:32:24

1: TOF MS ES+  
1.81e7

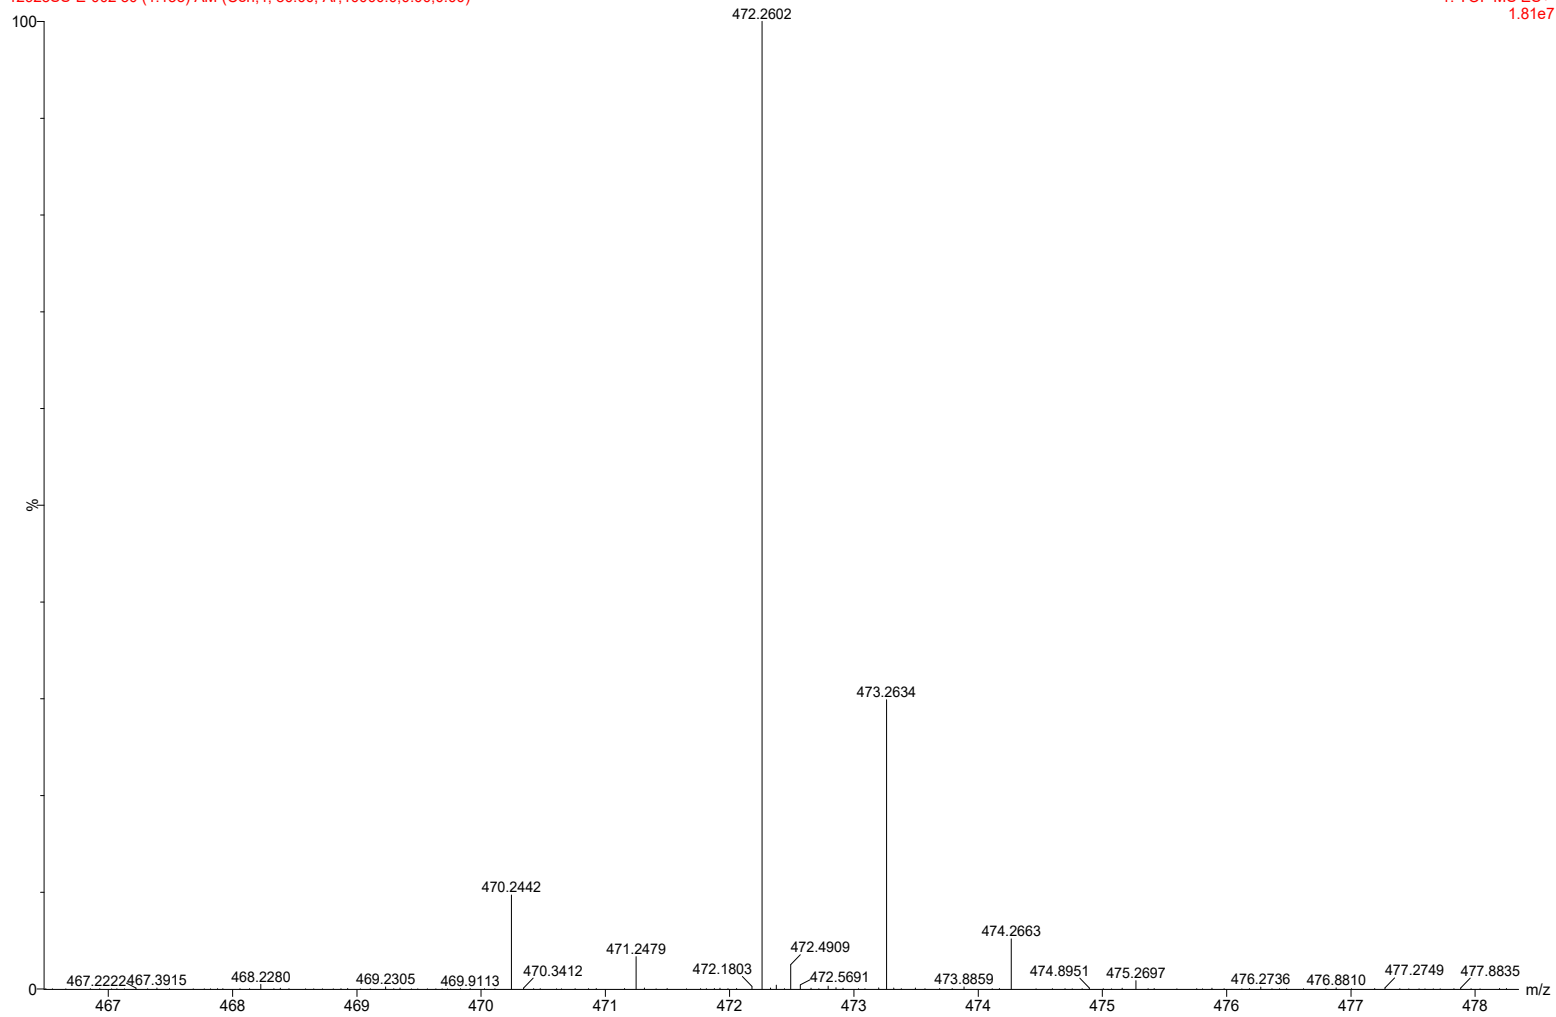

HRMS of TPS-52

EDG-46  
Gardner

12923SS-D-002 28 (1.065) AM (Cen,4, 80.00, Ar,10000.0,0.00,0.00)

SYNAPTG2-Si#UGA589

22-Aug-2019 11:21:38

1: TOF MS ES+  
1.63e6

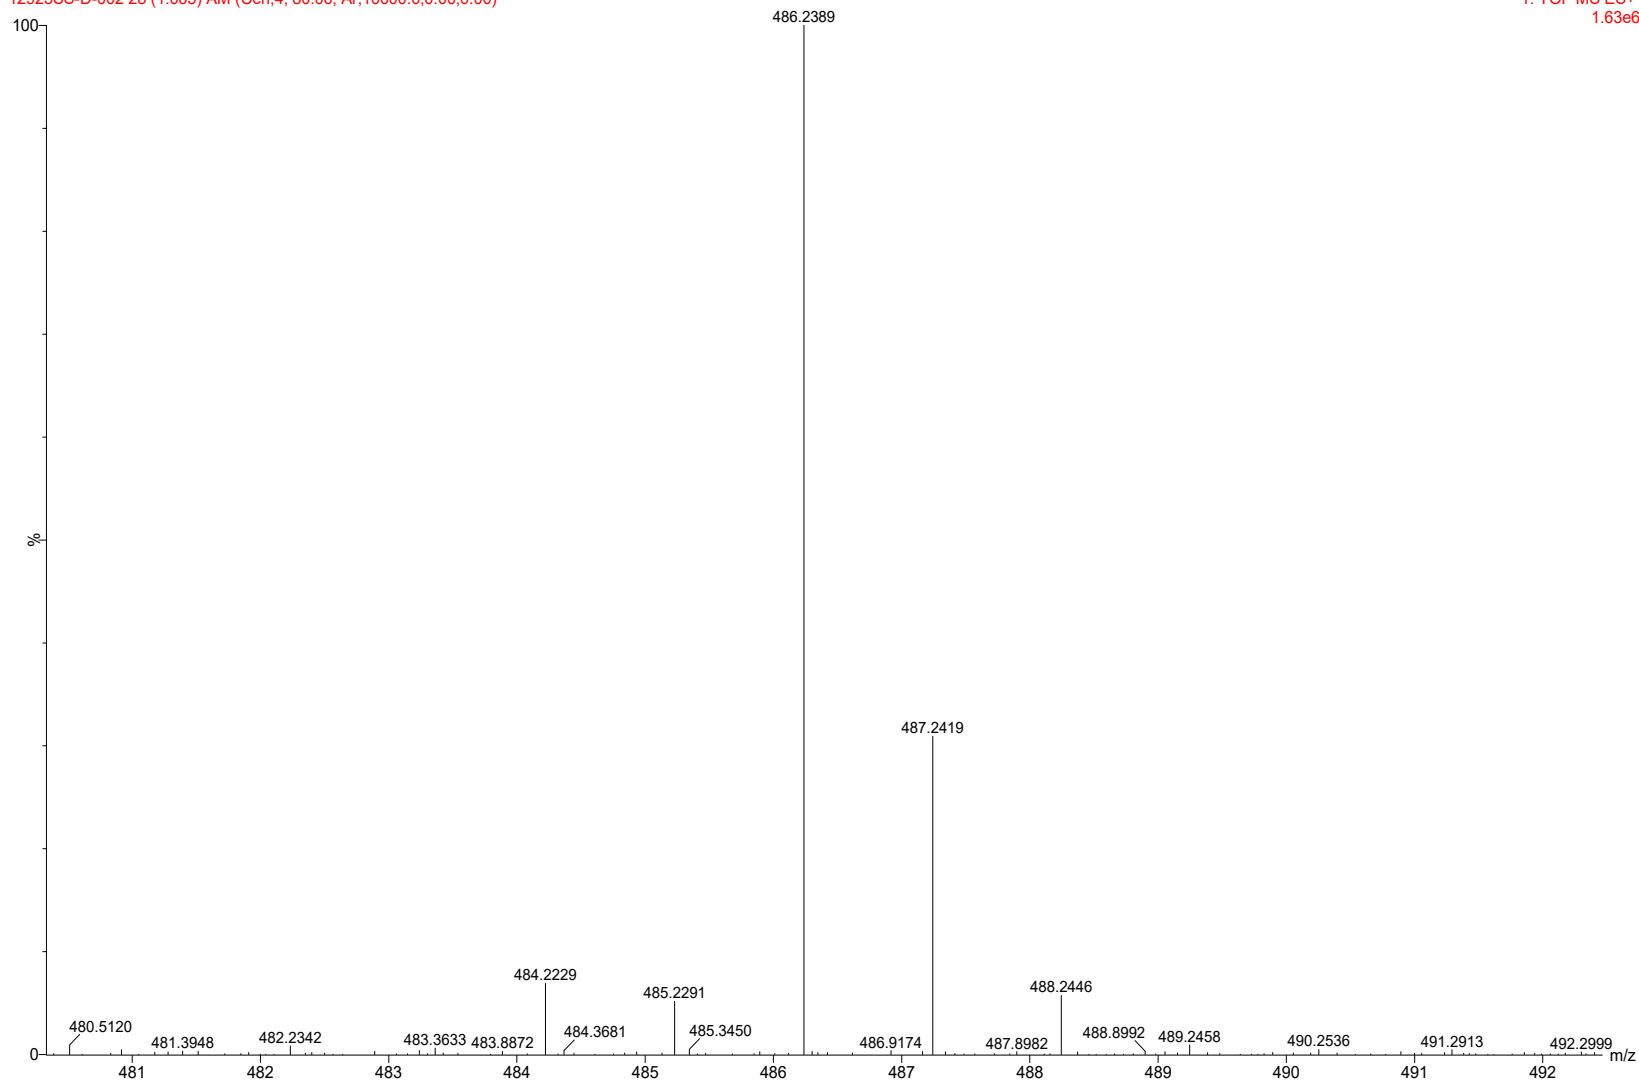

HRMS of TPS-58

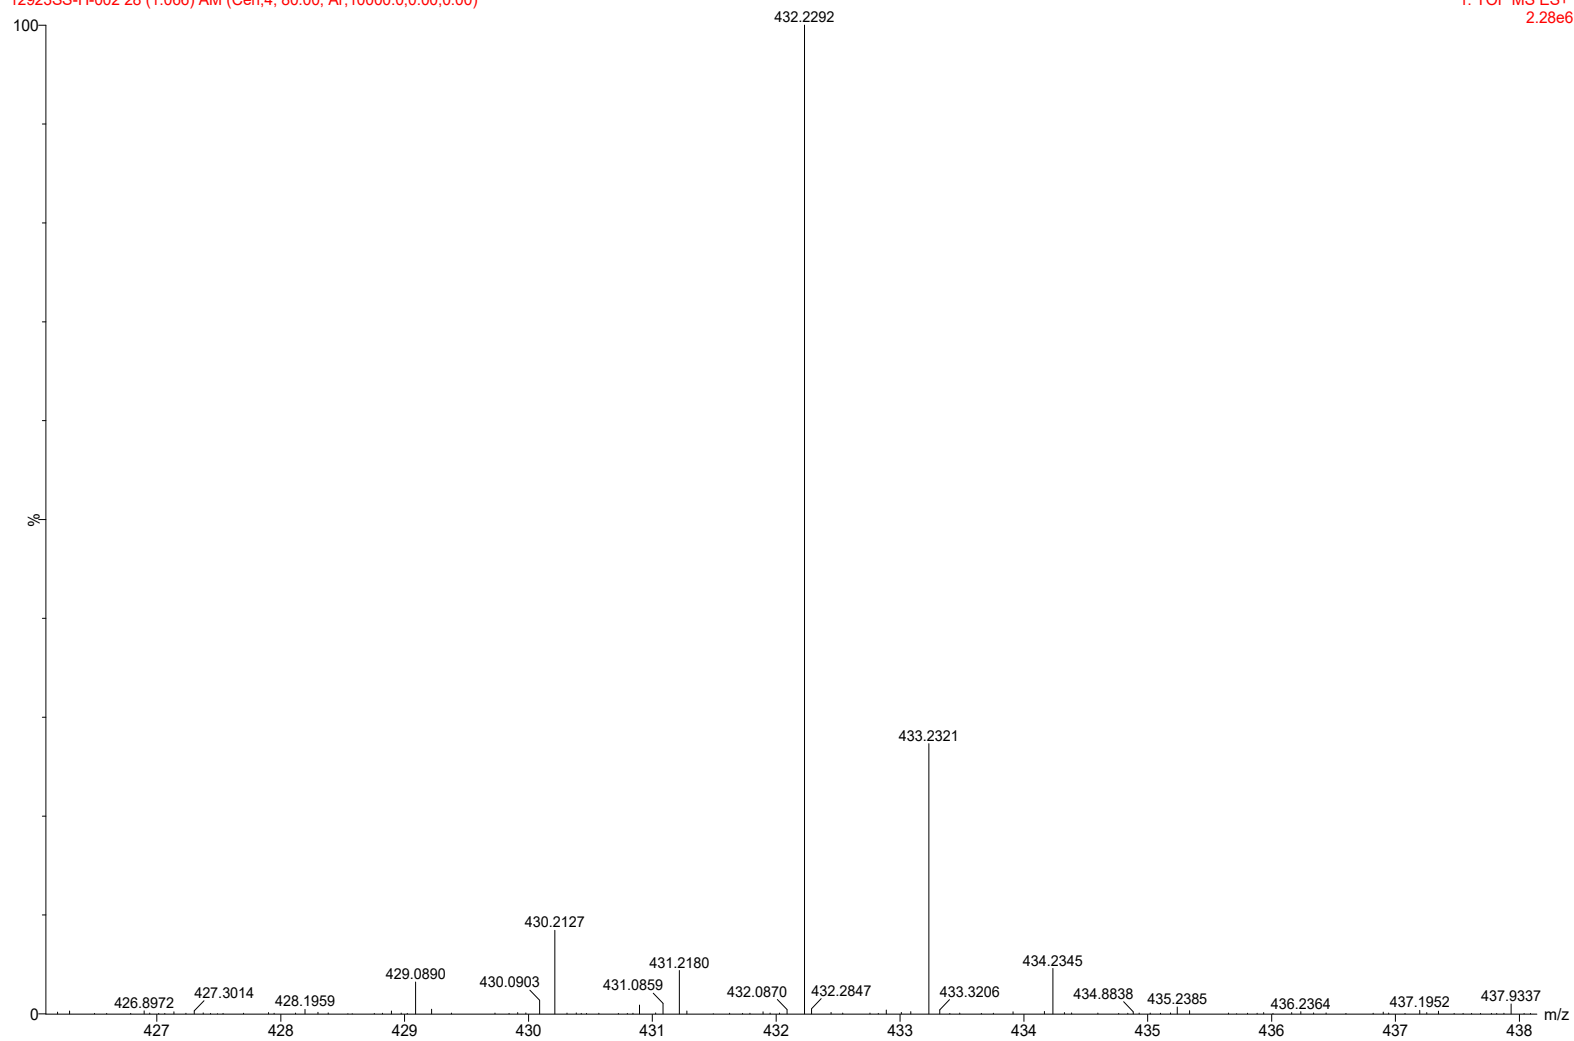

HRMS of TPS-61-P1

TPS-70-P2

Gardner

12923SS-I-002 30 (1.133) AM (Cen,4, 80.00, Ar,10000.0,0.00,0.00)

SYNAPT G2-Si#UGA589

22-Aug-2019 12:15:57

1: TOF MS ES+  
2.56e7

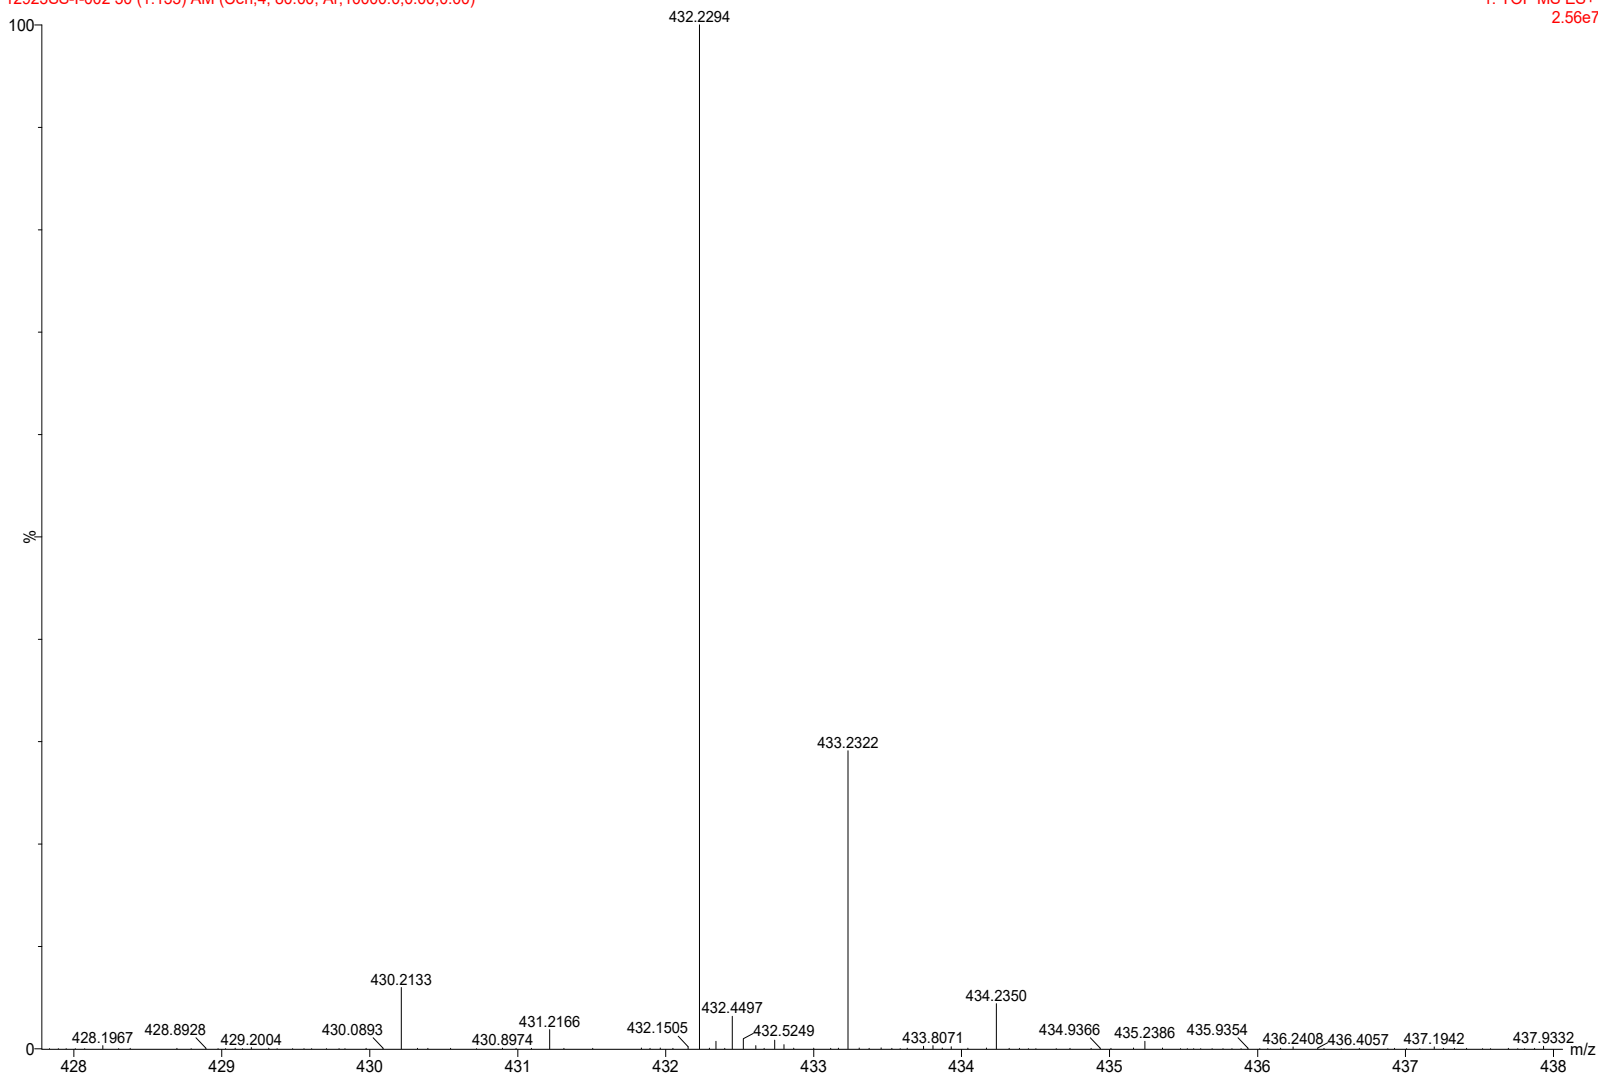

HRMS of TPS-61-P2

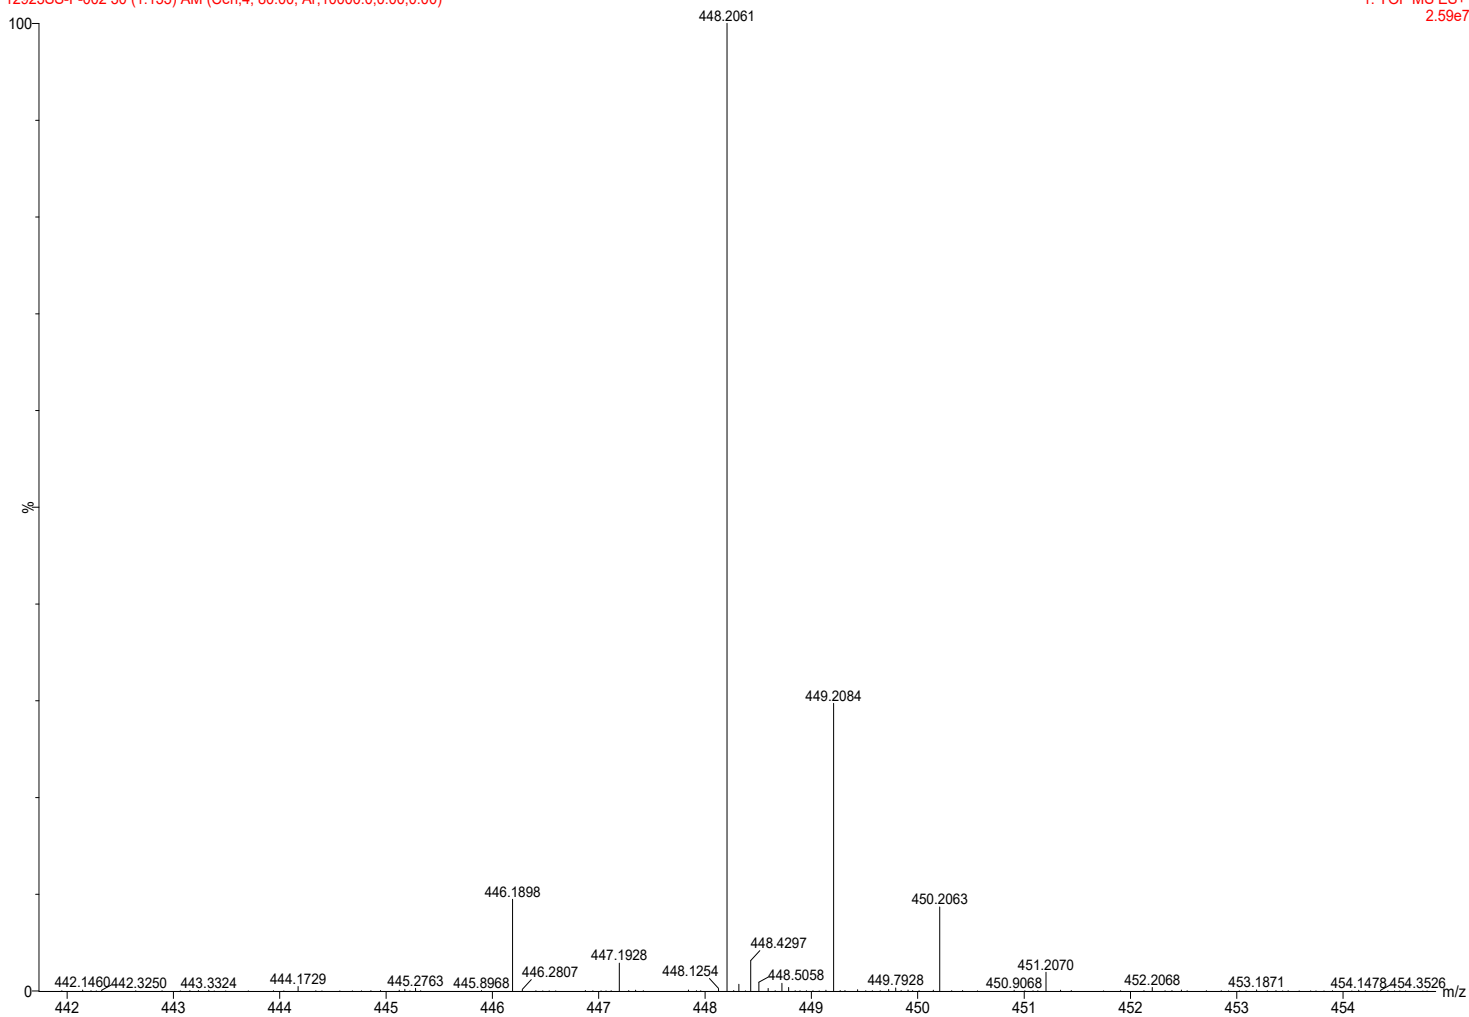

HRMS of TPS-62

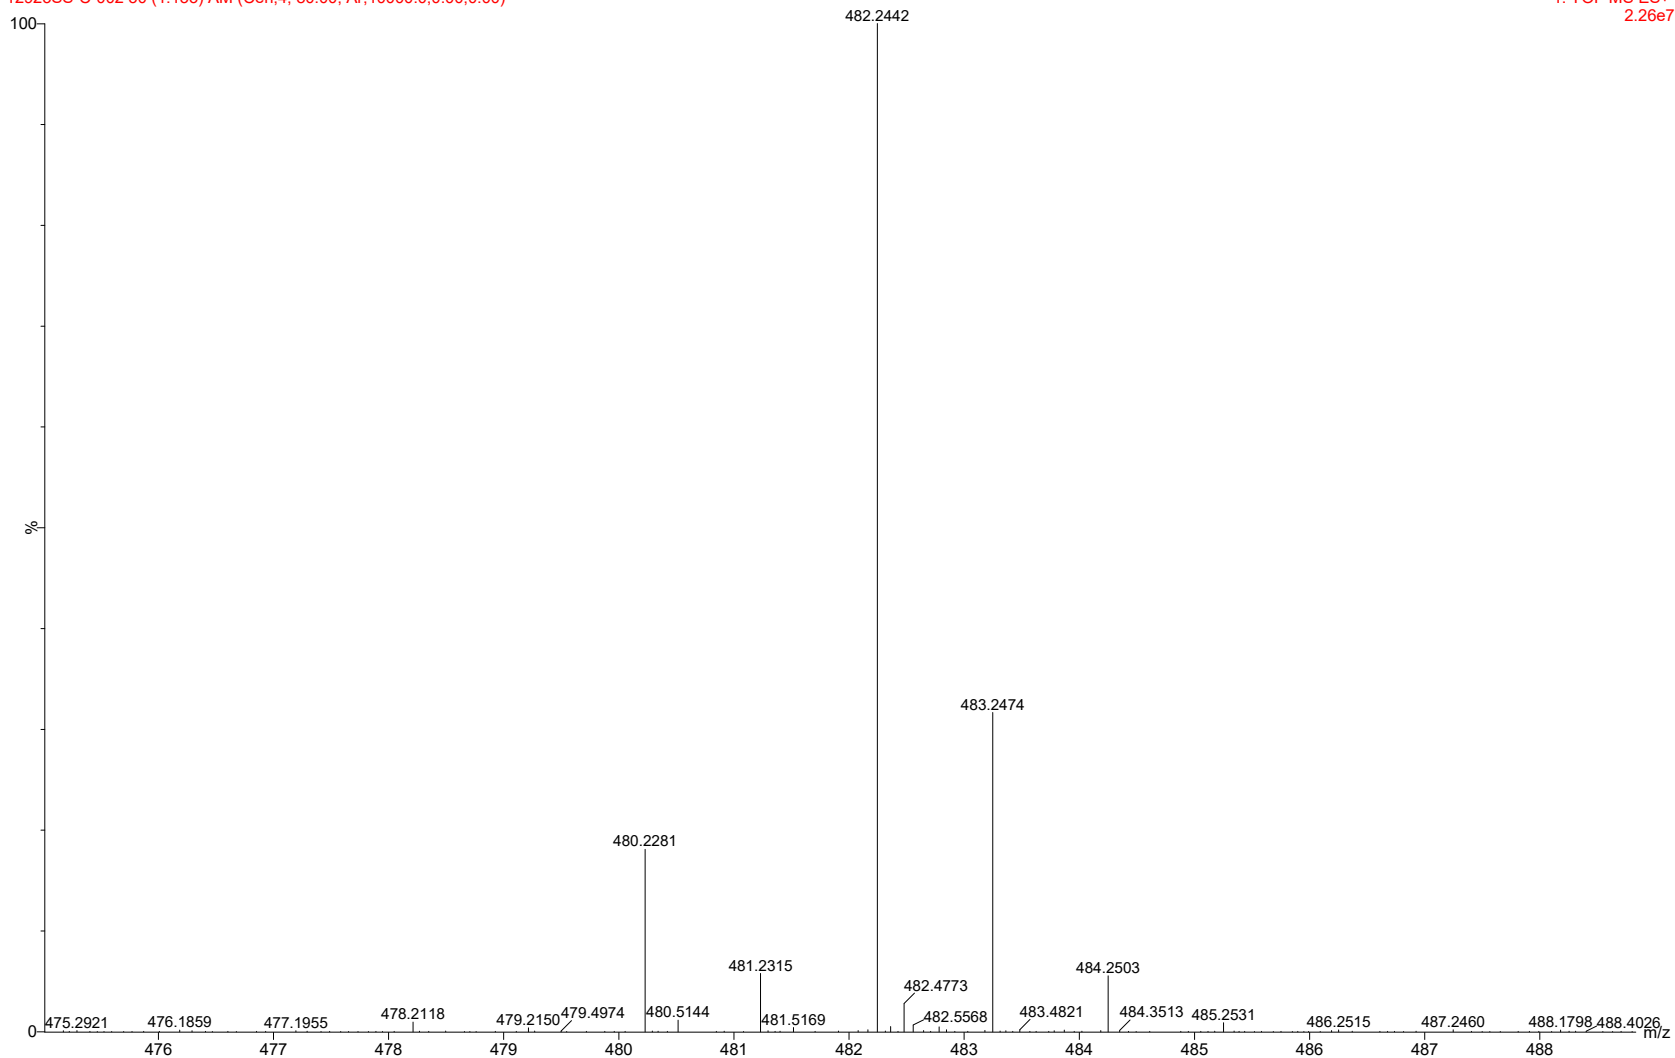

HRMS of TPS-65

TPS-67  
Gardner

SYNAPT G2-Si#UGA589

24-Jul-2020 15:59:30

13077SS-049 27 (1.033) AM (Cen,4, 80.00, Ar,10000.0,0.00,0.00); Cm (27:31)

1: TOF MS ES+  
2.31e6

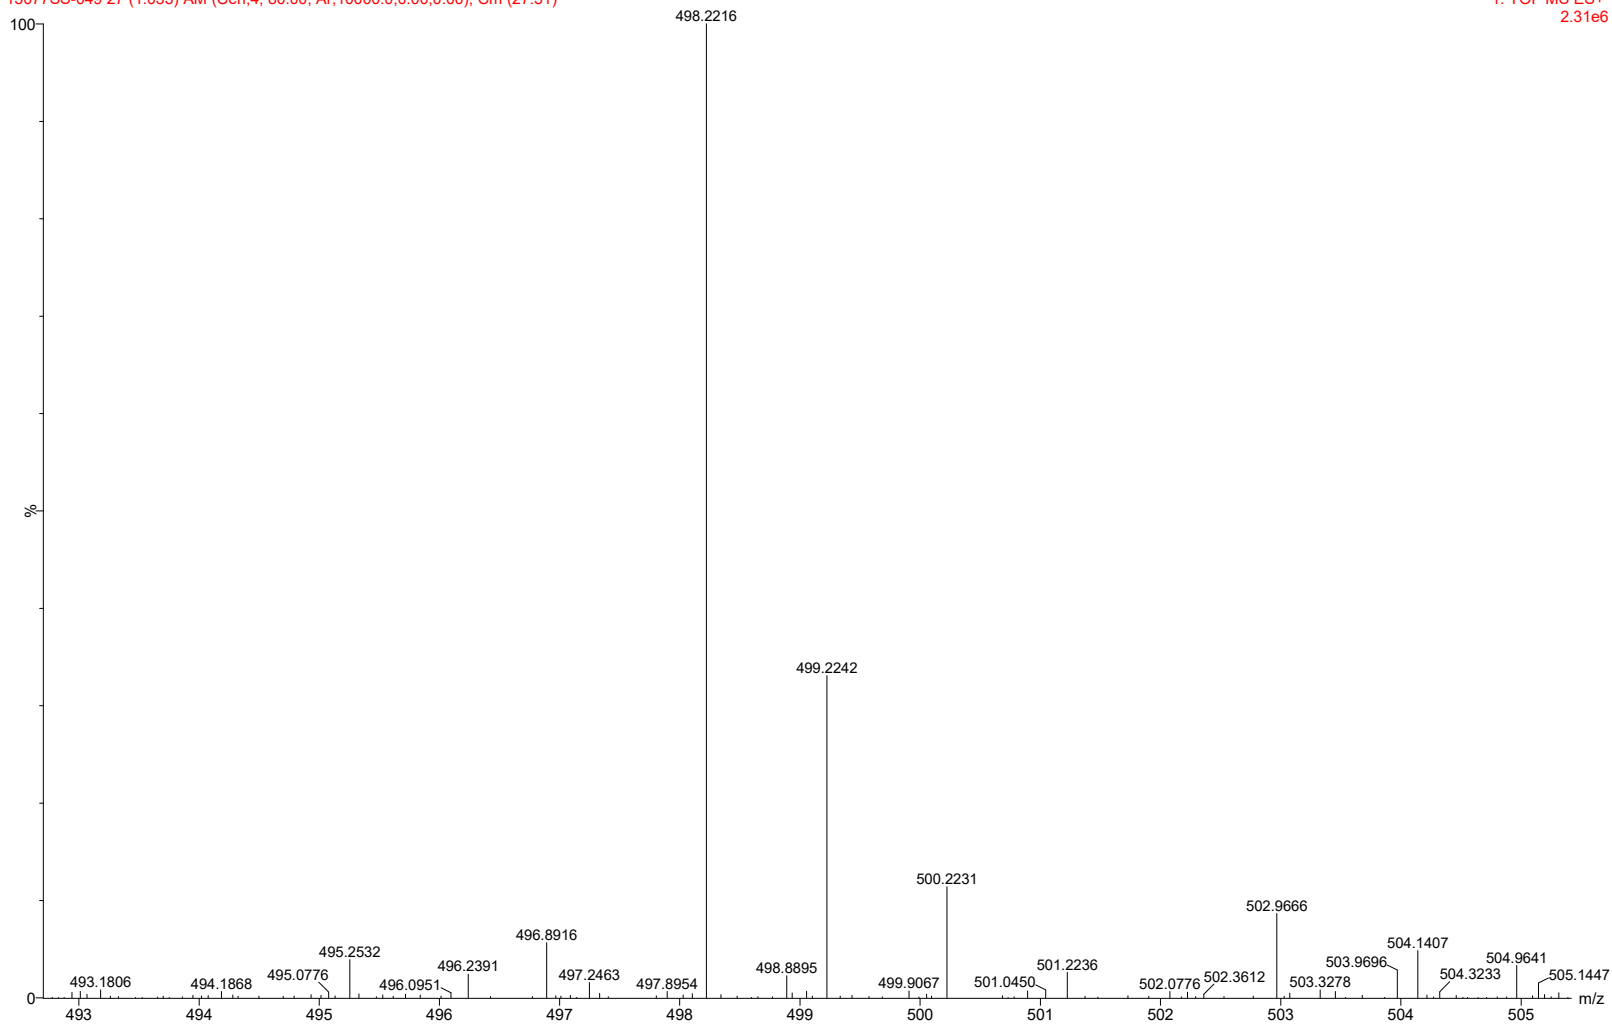

HRMS of TPS-66
